# Supplementary material for: Genome characteristics and type IV effector protein repertoire of Coxiella burnetii depend rather on Genomic Groups than on host species
Source: BMC Microbiol. 2026 Apr 22;26:393. doi: 10.1186/s12866-026-04897-w (PMC13104383; doi:10.1186/s12866-026-04897-w)
Supplement: Supplementary file 2 — Additional file 2: Table S2. Known C. burnetii effector protein-coding genes. List of accession numbers of known effector protein-encoding loci in C. burnetii strain Nine Mile I. Corresponding loci in other reference strains were identified by BLAST search. [file 12866_2026_4897_MOESM2_ESM.xlsx]

## Sheet: Tabelle1
Coxiella burnetii RSA 493 literature research	Status in RSA 493 GenBank annotation (GCF_000007765.2)	Coxiella burnetii CbuG (GCF_000019865.1)	Coxiella burnetii CbuK (GCF_000019885.1)	Coxiella burnetii Dugway 5J108-111 (GCF_000017105.1)	Coxiella burnetii RSA 331 (GCF_000018745.1)	alternative name1	alternative name2	alternative name3
CBU_0012*	pseudogene	CbuG_0281*	CbuK_0201	CBUD_0136	COXBURSA331_A2190
CBU_0021	gene	CbuG_0289	CbuK_0209	CBUD_0143	COXBURSA331_A2183	cetCb1	cvpB	cig2
CBU_0041	gene	CbuG_1970	CbuK_1986	CBUD_2061	COXBURSA331_A0154*	coxCC1	cirA
CBU_0048	gene	CbuG_1952*	CbuK_2004*	CBUD_2044	COXBURSA331_A0133
CBU_0049	gene	-	-	-	-
CBU_0062	gene	-	-	-	-	cem1
CBU_0069*	pseudogene	-	CbuK_Rs10040, CbuK1981a	CBUD_2035	COXBURSA331_A0158	ankP
CBU_0072	gene	-	CbuK_1982*	CBUD_2034	COXBURSA331_A0160	ankA
CBU_0077	gene	CbuG_1938	CbuK_1977	CBUD_2029	COXBURSA331_A0165	mceA
CBU_0080*	discontinued	CbuG_1937	CbuK_1976	CBUD_2028*	COXBURSA331_A0167*
CBU_0088	not found	-	-	-	-
CBU_0113	gene	CbuG_1899	CbuK_1938	CBUD_1994	COXBURSA331_A0202	cem2
CBU_0122	gene	CbuG_1891	CbuK_1929	CBUD_1984	COXBURSA331_A0212
CBU_0128	pseudogene	-	-	-	-
CBU_0129*	discontinued	CbuG_1886	-	CBUD_1978*	COXBURSA331_A0218	coxCC2
CBU_0144*	pseudogene	CbuG_1870*	CbuK_1907	CBUD_1960*	COXBURSA331_A0237
CBU_0145	discontinued	-	-	-	-	ankB
CBU_0175	gene	CbuG_1837	CbuK_0362	CBUD_1925	COXBURSA331_A0265	coxK1
CBU_0183	gene	CbuG_1822	CbuK_0377	CBUD_1910	COXBURSA331_A0280
CBU_0201	gene	CbuG_1805	CbuK_0392	CBUD_1894	COXBURSA331_A0296	ankC
CBU_0212*	discontinued	CbuG_1796	CbuK_0401	CBUD_1884	-	elpA
CBU_0270	gene	CbuG_1738	CbuK_0462	CBUD_1824	COXBURSA331_A0369
CBU_0295	gene	CbuG_1711*	CbuK_0492*	CBUD_1787	COXBURSA331_A0401*
CBU_0329*	discontinued	CbuG_1677*	CbuK_0525*	CBUD_1750*	COXBURSA331_A0436*; COXBURSA331_A0435*
CBU_0344*	pseudogene	CbuG_1663*	CbuK_0540	CBUD_1734	COXBURSA331_A0453
CBU_0356	discontinued	-	-	-	-	ankE
CBU_0372	gene	CbuG_1637*	CbuK_0563*	CBUD_1711	COXBURSA331_A0478
CBU_0375*	pseudogene	CbuG_1634*	CbuK_0569*	CBUD_1704	-
CBU_0376	discontinued	-	-	-	-
CBU_0388	gene	CbuG_1619*	CbuK_1672	CBUD_1680*	COXBURSA331_A0499	cetCb2
CBU_0393	discontinued	-	-	-	-
CBU_0410	gene	CbuG_1603	CbuK_1657*	CBUD_1664	COXBURSA331_A0518	coxCC3
CBU_0414*	discontinued	CbuG_1597	CbuK_1651*	CBUD_1656	COXBURSA331_A0522	coxH1
CBU_0425	gene	CbuG_1587	CbuK_1643*	CBUD_1648	COXBURSA331_A0532	cirB
CBU_0447	gene	CbuG_1564	CbuK_1411	CBUD_1627	COXBURSA331_A0556	ankF
CBU_0469	gene	CbuG_1544	CbuK_1391	CBUD_1609	COXBURSA331_A0575
CBU_0487	gene	-	-	-	-
CBU_0505	gene	-	-	-	-	cig14
CBU_0513	gene	CbuG_1498	CbuK_1341	CBUD_1562	COXBURSA331_A0625	cinF
CBU_0519	gene	-	-	-	-	dedA
CBU_0534	gene	-	CbuK_1302	CBUD_1528	COXBURSA331_A0649
CBU_0542	gene	-	-	-	-	ligA
CBU_0547	gene	-	-	-	-
CBU_0590	gene	-	CbuK_1248	CBUD_1474	COXBURSA331_A0704
CBU_0606*	discontinued	-	-	CBUD_0618	-
CBU_0626	gene	CbuG_1377	CbuK_1629	CBUD_0638	COXBURSA331_A0741	cetCb3
CBU_0635	gene	CbuG_1369	CbuK_1621*	CBUD_0646	COXBURSA331_A0749*
CBU_0637	gene	CbuG_1367	CbuK_1619	CBUD_0648	COXBURSA331_A0751
CBU_0649	gene	-	-	-	-
CBU_0665	gene	CbuG_1341	CbuK_1593	CBUD_0675	COXBURSA331_A0778*	cvpA
CBU_0773	gene	CbuG_1228	CbuK_0643	CBUD_0821	COXBURSA331_A1175	phnB
CBU_0781	gene	CbuG_1220	CbuK_0651	CBUD_0829	COXBURSA331_A1167	ankG
CBU_0790	pseudogene	-	-	-	-
CBU_0794	gene	CbuG_1207	CbuK_0662	CBUD_0861*	COXBURSA331_A1155	coxCC4
CBU_0801	gene	CbuG_1199	CbuK_0670	CBUD_0868	COXBURSA331_A1148	rimL	coxH2
CBU_0814*	pseudogene	CbuG_1185*	CbuK_0684	CBUD_0882*	COXBURSA331_A1135*; COXBURSA331_A1136*	coxU1
CBU_0822	gene	-	-	-	-	fic2
CBU_0881	gene	CbuG_1121	-	-	COXBURSA331_A1066	coxCC5
CBU_0885	gene	CbuG_1117	CbuK_0750	CBUD_0949	COXBURSA331_A1062	cetCb4
CBU_0886	gene	-	-	-	-
CBU_0937	gene	CbuG_1068	CbuK_0900	CBUD_1137	COXBURSA331_A1007	cirC	coxDFB1	mceB
CBU_0978	gene	CbuG_1027	CbuK_0861	CBUD_1069	COXBURSA331_A0960	cem3
CBU_1024*	pseudogene	CbuG_0983*	CbuK_0815*	CBUD_1019	COXBURSA331_A0916*	ankH
CBU_1043	gene	-	-	-	-	gacA
CBU_1045*	discontinued	CbuG_0959	CbuK_0793*	CBUD_0997	COXBURSA331_A0894	coxDFB2
CBU_1063	gene	CbuG_0941	CbuK_0928*	CBUD_1164	COXBURSA331_A0871	cem4
CBU_1079	gene	CbuG_0924	CbuK_0945	CBUD_1181	COXBURSA331_A0851
CBU_1102*	discontinued	-	CbuK_0972	CBUD_1204	-
CBU_1107*	pseudogene	-	CbuK_0977*	CBUD_1210	COXBURSA331_A1253*
CBU_1108	discontinued	-	-	-	-
CBU_1110	discontinued	-	-	-	-
CBU_1150*	pseudogene	CbuG_0859	CbuK_1017*	CBUD_1247	COXBURSA331_A1300
CBU_1198	gene	CbuG_0811	CbuK_1062	CBUD_1287	COXBURSA331_A1348
CBU_1213	gene	CbuG_0789	-	CBUD_1298	-	ankI
CBU_1217	gene	CbuG_0795*	CbuK_1077	CBUD_1301*	COXBURSA331_A1358	coxU2	nopA
CBU_1251	not found	-	-	-	-
CBU_1253	pseudogene	-	-	CBUD_RS06720	-	ankJ
CBU_1254	discontinued	-	-	-	-
CBU_1268	gene	CbuG_0742	CbuK_1130	CBUD_1353	COXBURSA331_A1416	ankN
CBU_1292	gene	-	-	-	-	ankK
CBU_1314	gene	CbuG_0696	CbuK_1177	CBUD_1402	COXBURSA331_A1465	coxCC6
CBU_1349	gene	CbuG_0662	CbuK_1211	CBUD_1437	COXBURSA331_A1449
CBU_1370	gene	CbuG_0643	-	CBUD_1457	COXBURSA331_A1526	cem5	EPF1
CBU_1379*	pseudogene	CbuG_0633	CbuK_1237	CBUD_1462*	COXBURSA331_A1537*	coxK2
CBU_1387	gene	CbuG_0624	CbuK_1458	CBUD_0607	COXBURSA331_A1546	cem6	emcA
CBU_1406*	pseudogene	CbuG_0608*	CbuK_1480	CBUD_0588	COXBURSA331_A1566*	coxDFB3
CBU_1409	gene	-	-	CBUD_0587	-	cem7
CBU_1425	gene	CbuG_0591	CbuK_1498	CBUD_0572	COXBURSA331_A1585	coxDFB4	mceC
CBU_1434	gene	CbuG_0575	CbuK_0601	CBUD_0561	COXBURSA331_A1602
CBU_1457	gene	CbuG_0554	CbuK_1685	CBUD_0496	COXBURSA331_A1628*	coxTPR1
CBU_1460	gene	CbuG_0550*	CbuK_1689*	CBUD_0501*	COXBURSA331_A1633*	coxCC7	cig44
CBU_1461*	pseudogene	CbuG_0549*	CbuK_1690	CBUD_0503*	COXBURSA331_A1635*	coxCC8
CBU_1485	gene	-	-	-	-
CBU_1493	gene	CbuG_0513	CbuK_1724	CBUD_0489	COXBURSA331_A1673
CBU_1524*	discontinued	CbuG_0468	CbuK_1751	CBUD_0462	COXBURSA331_A1705*	coxCC9	caeA
CBU_1530	gene	CbuG_0481	CbuK_1757	-	-
CBU_1532*	discontinued	CbuG_0477	CbuK_1760*	CBUD_0454	COXBURSA331_A1716*	caeB
CBU_1543	gene	CbuG_0467	CbuK_1769	CBUD_0444	COXBURSA331_A1727	coxCC10	cig49	mceF
CBU_1556	gene	CbuG_0454	CbuK_1785	CBUD_0430	COXBURSA331_A1743	coxCC11	cvpC
CBU_1566	gene	CbuG_0446	CbuK_1793	CBUD_0422	COXBURSA331_A1752
CBU_1569	gene	CbuG_0443*	CbuK_1796*	CBUD_0419	COXBURSA331_A1755*	coxCC12
CBU_1576	gene	CbuG_0436	-	CBUD_0410	COXBURSA331_A1764
CBU_1594	gene	-	CbuK_1823	CBUD_0395	COXBURSA331_A1782	mceD
CBU_1599*	discontinued	CbuG_0414*	CbuK_1827*	CBUD_0392*	-	coxCC13
CBU_1607	gene	CbuG_0407	CbuK_1834	CBUD_0383	COXBURSA331_A1795
CBU_1614	gene	-	CbuK_1838	-	-
CBU_1620	discontinued	-	-	-	-
CBU_1634a	gene	CbuG_0388	CbuK_1857	CBUD_0363	COXBURSA331_A1819	cem8
CBU_1636	gene	CbuG_0386*	CbuK_1859*	CBUD_0362*	COXBURSA331_A1821	coxCC14	cig55
CBU_1639	gene	CbuG_0383*	CbuK_1862	CBUD_0358	COXBURSA331_A1824
CBU_1665	gene	-	CbuK_0343*	CBUD_0334	COXBURSA331_A1856
CBU_1676	gene	CbuG_0345	-	CBUD_0325	-	cem9
CBU_1677	gene	CbuG_0344	CbuK_0333	CBUD_0324	COXBURSA331_A1868	mceE
CBU_1685	gene	CbuG_0337	CbuK_0326*	CBUD_0317*	COXBURSA331_A1874
CBU_1686	gene	CbuG_0336	CbuK_0325*	CBUD_0315*	COXBURSA331_A1875	cetCb5
CBU_1699	gene	-	-	-	-
CBU_1724	gene	CbuG_0105*	CbuK_0285	CBUD_0279*	COXBURSA331_A1915*	cetCb6
CBU_1751	gene	CbuG_0133	CbuK_0255	CBUD_0250	COXBURSA331_A1944	coxDFB5	cig57
CBU_1752	gene	CbuG_0134	CbuK_0254	CBUD_0249	COXBURSA331_A1945
CBU_1754	gene	CbuG_0136	CbuK_0252	CBUD_0247	COXBURSA331_A1947
CBU_1757*	pseudogene	CbuG_0139*	CbuK_0249*	CBUD_0245	COXBURSA331_A1949	ankM	cig58
CBU_1769	gene	CbuG_0151	CbuK_0236	CBUD_0236	COXBURSA331_A1962	coxH3
CBU_1776*	discontinued	-	CbuK_0231	CBUD_0231	COXBURSA331_A1971
CBU_1780	gene	-	-	-	-
CBU_1789	gene	CbuG_0170	CbuK_0083	CBUD_0015	COXBURSA331_A1987
CBU_1790	gene	CbuG_0171	-	-	COXBURSA331_A1988*
CBU_1794	gene	CbuG_0172	CbuK_0087	CBUD_0020	COXBURSA331_A1991	cem10
CBU_1802	gene	-	-	-	-
CBU_1818	gene	CbuG_0191	CbuK_0114	CBUD_0047	COXBURSA331_A2017	cem11	cvpD
CBU_1819	gene	CbuG_0192	CbuK_0115	CBUD_0048	COXBURSA331_A2018
CBU_1823	gene	CbuG_0197	CbuK_0119*	CBUD_0053	COXBURSA331_A2023	coxH4	cig61	icaA
CBU_1825	gene	CbuG_1971	CbuK_0120	CBUD_0054	COXBURSA331_A2024	coxDFB6
CBU_1863	gene	CbuG_0238	CbuK_0162	CBUD_0094	COXBURSA331_A2066	cvpE
CBU_1957	gene	-	-	-	-
CBU_1963*	discontinued	-	CbuK_2014	CBUD_2063	COXBURSA331_A0120
CBU_2007	gene	CbuG_2016	CbuK_2058	CBUD_2108	COXBURSA331_A0078	cem12	vice
CBU_2013	gene	CbuG_2022	CbuK_2064	CBUD_2113	COXBURSA331_A0073	cem13	emcB
CBU_2016	gene	CbuG_2025	CbuK_2067	CBUD_2117	COXBURSA331_A0068
CBU_2028	gene	CbuG_2038*	CbuK_2080*	CBUD_2129	COXBURSA331_A0056
CBU_2052	gene	CbuG_2057	CbuK_2099	CBUD_2147	COXBURSA331_A0031	coxCC15	cirD
CBU_2056	gene	CbuG_2060*	CbuK_2102	CBUD_2151	COXBURSA331_A0027*
CBU_2059*	pseudogene	CbuG_2063*	CbuK_2105*	CBUD_2154	COXBURSA331_A0024	cirE
CBU_2064	discontinued	-	-	-	-
CBU_2069	gene	-	-	-	-
CBU_2076	gene	CbuG_2077	CbuK_2121	CBUD_2172	COXBURSA331_A0009
CBU_2078	gene	CbuG_2079	CbuK_2125	CBUD_2174	COXBURSA331_A2207	coxfic1	fic family proteinF1
CBUA0006	gene	-	CbuK_A0010	CBUD_A0032	COXBURSA331_0047	cpeA
CBUA0013	gene	-	CbuK_A0019	CBUD_A0046	COXBURSA331_0008	cpeB
CBUA0014	gene	-	-	-	COXBURSA331_0010	cpeC	coxU3
CBUA0015	gene	-	-	-	COXBURSA331_0011	cpeD
CBUA0016	gene	-	-	-	COXBURSA331_0012	cpeE
CBUA0019	discontinued	-	-	-	-
CBUA0020	gene	-	-	CBUD_A0049	COXBURSA331_0014
CBUA0023	gene	-	CbuK_A0021	CBUD_A0052	COXBURSA331_0017	cpeF
CBUA0025	gene	-	CbuK_A0023	-	-	cpeG
CBUA0034	gene	-	CbuK_A0037	CBUD_A0063a	-	cpeH
-		-	-	CBUD_2035	-	ankO
