# Supplementary material for: Genome characteristics and type IV effector protein repertoire of Coxiella burnetii depend rather on Genomic Groups than on host species
Source: BMC Microbiol. 2026 Apr 22;26:393. doi: 10.1186/s12866-026-04897-w (PMC13104383; doi:10.1186/s12866-026-04897-w)
Supplement: Supplementary file 4 — Additional file 4: Table S3. Detected IS elements. Typed and corresponding numbers of IS elements detected in 71 C. burnetii genome assemblies that were almost closed (max. three contigs). [file 12866_2026_4897_MOESM4_ESM.xlsx]

## Sheet: Tabelle1
ID	IS110	IS1634	IS3	IS30	ISAS1	ISNCY	IS4	IS481	total
15QC1192	50	1	1	5	4	1	0	0	62
15QC1194	48	1	1	5	4	1	0	0	60
15QC1195	50	1	1	5	4	1	0	0	62
15QC1196	48	1	1	5	4	1	0	0	60
15QC1197	50	1	1	5	4	1	0	0	62
15QC1330	22	1	1	5	3	1	0	0	33
15QC1343	49	1	1	5	4	1	0	0	61
15QC1346	49	1	1	5	4	1	0	0	61
15QC1348	49	1	1	5	4	1	0	0	61
15QC1349	49	1	1	5	4	1	0	0	61
18QC0072	49	1	1	5	4	1	0	0	61
18QC0075	22	1	1	5	3	1	0	0	33
18QC1769	20	1	1	5	4	1	0	0	32
18QC1771	49	1	1	5	4	1	0	0	61
18QC1773	49	1	1	5	4	1	0	0	61
18QC1774	49	1	1	5	4	1	0	0	61
18QC1775	50	1	1	5	4	1	0	0	62
19QC0291	22	1	1	5	3	1	0	0	33
21QC0776	22	1	1	5	3	1	0	0	33
21QC0869	22	1	1	5	3	1	0	0	33
22QC0001	22	1	1	5	3	1	0	0	33
22QC1334	49	1	1	5	4	1	0	0	61
22QC1335	22	1	1	5	3	1	0	0	33
22QC1336	22	1	1	5	3	1	0	0	33
22QC1338	22	1	1	5	3	1	0	0	33
22QC1339	50	1	1	5	4	1	0	0	62
22QC1340	22	1	1	5	3	1	0	0	33
22QC1341	22	1	1	5	3	1	0	0	33
22QC1342	22	1	1	5	3	1	0	0	33
22QC1343	22	1	1	5	3	1	0	0	33
23QC0408	102	1	1	5	3	1	0	0	113
23QC0414	49	1	1	5	4	1	0	0	61
23QC0415	49	1	1	5	4	1	0	0	61
23QC0422	20	1	1	5	4	1	0	0	32
23QC0438	22	1	1	5	3	1	0	0	33
23QC0439	22	1	1	5	3	1	0	0	33
23QC0441	49	1	1	5	4	1	0	0	61
GCF_000017105.1	12	1	1	13	4	1	1	1	34
GCF_000019865.1	28	1	1	7	4	1	0	1	43
GCF_000019885.1	48	1	0	5	3	1	0	2	60
GCF_000168875.2	48	1	0	5	3	1	0	2	60
GCF_000751935.1	0	1	1	1	0	1	0	1	5
GCF_000767035.1	1	1	1	5	3	1	0	1	13
GCF_000820465.1	24	1	1	4	2	1	0	0	33
GCF_001572745.1	103	1	1	5	3	1	0	0	114
GCF_001572765.1	3	1	1	1	1	1	0	0	8
GCF_002633885.1	1	1	1	2	1	1	0	1	8
GCF_002633905.1	13	1	1	1	1	1	0	0	18
GCF_002633925.1	11	1	1	1	1	1	0	0	16
GCF_002633945.1	3	1	1	1	2	1	0	0	9
GCF_002633965.1	4	1	1	1	2	1	0	0	10
GCF_002633985.1	2	1	1	1	2	1	0	0	8
GCF_002634005.1	5	1	1	1	2	1	0	0	11
GCF_002634025.1	3	1	1	1	2	1	0	0	9
GCF_002634045.1	3	1	1	1	2	1	0	0	9
GCF_002634065.1	19	1	1	1	1	1	0	0	24
GCF_002634085.1	4	1	1	1	1	1	0	0	9
GCF_024918495.1	1	1	1	0	1	1	0	0	5
GCF_024918535.1	1	1	1	0	1	1	0	0	5
GCF_024918555.1	1	1	0	0	1	1	0	1	5
GCF_024918575.1	1	1	0	0	1	1	0	1	5
GCF_024918595.1	0	1	1	0	1	1	0	0	4
GCF_024918615.1	1	1	1	0	1	1	0	0	5
GCF_024918635.1	0	1	1	0	1	1	0	0	4
GCF_024918655.1	1	1	1	0	0	1	0	0	4
GCF_024918675.1	1	1	0	0	0	1	0	1	4
GCF_024918695.1	1	1	1	0	1	1	0	0	5
GCF_027627535.1	20	1	1	5	4	1	0	0	32
GCF_027943585.1	22	1	1	5	3	1	0	0	33
GCF_027943605.1	20	1	1	5	4	1	0	0	32
GCF_000007765.2	20	1	1	5	4	1	0	0	32
