# Supplementary material for: Genome characteristics and type IV effector protein repertoire of Coxiella burnetii depend rather on Genomic Groups than on host species
Source: BMC Microbiol. 2026 Apr 22;26:393. doi: 10.1186/s12866-026-04897-w (PMC13104383; doi:10.1186/s12866-026-04897-w)
Supplement: Supplementary file 5 — Additional file 5: Table S4. Number of core genes per Genomic Group. Total number of genes shared by all strains of each Genomic Group and relative percentage com-pared to the mean of detected genes in all strains of a Genomic Group. Groups II and IV have been split into subgroups and are only mentioned for backward comparison. [file 12866_2026_4897_MOESM5_ESM.xlsx]

## Sheet: Tabelle1
Genomic Group	# core genes (in 100% of isolates)	Mean of detected genes	Percentage of core genes [%]
I	1749	2018	86.67
II	1705	n.d.	-
II-a	1776	2100	84.5714
II-b	1729	2073	83.4057
II-c	1766	2084	84.7409
III	1828	2044	89.4325
IV	1644	n.d.	-
IV-a	1749	2013	86.8852
IV-b	1664	1980	84.0404
V	1801	2009	89.6466
VI	1979	2079	95.19
