# Supplementary material for: Genome characteristics and type IV effector protein repertoire of Coxiella burnetii depend rather on Genomic Groups than on host species
Source: BMC Microbiol. 2026 Apr 22;26:393. doi: 10.1186/s12866-026-04897-w (PMC13104383; doi:10.1186/s12866-026-04897-w)
Supplement: Supplementary file 6 — Additional file 6: Table S5. Unique SNPs in core genome and effector genes. Location of unique base variants per Genomic Group detected in either the complete core genome or the effector genes that were present in all strains. The positions are relative to the reference strain Nine Mile I (GCF_000007765.2). [file 12866_2026_4897_MOESM6_ESM.xlsx]

## Sheet: unique core genome region
# unique singe nucleotide variants in core genome region, relative to Nine Mile I reference genome (GCF_000007765.2)
GGI-III-like			GGI			GGII-a			GGII-b			GGII-c			GGIII			GGIV-a			GGIV-b - with strain Namibia			GGIV-b - without strain Namibia			strain Namibia (MST ST30)			GGV			GGVI
Position	Unique Base	Other Groups Bases	Position	Base	Other Groups Bases	Position	Base	Other Groups Bases	Position	Base	Other Groups Bases	Position	Base	Other Groups Bases	Position	Base	Other Groups Bases	Position	Base	Other Groups Bases	Position	Base	Other Groups Bases							Position	Base	Other Groups Bases	Position	Base	Other Groups Bases
3033	A	['G']	10441	A	['C']	18518	T	['C']	1896	T	['C']	46614	A	['G']	11209	A	['G']	3025	G	['C']	1414263	A	['G']	18165	G	['A']	2049	C	['T']	769	C	['T']	1833	G	['A']
11319	T	['C']	19322	T	['C']	45311	T	['C']	42093	G	['A']	50443	T	['C']	13986	T	['C']	9194	A	['G']				21253	C	['T']	9416	A	['G']	4844	T	['C']	2488	T	['C']
12399	A	['G']	19472	T	['A']	61143	A	['G']	53071	T	['G']	82519	T	['A']	15140	A	['G']	13179	T	['C']				26589	T	['C']	9519	G	['A']	6025	G	['C']	3354	G	['A']
19189	G	['C']	23144	C	['T']	68243	T	['C']	124852	A	['C']	86951	A	['G']	25619	T	['C']	13391	G	['C']				26600	T	['C']	9588	C	['T']	10012	T	['C']	3720	A	['G']
50393	C	['G']	30445	A	['G']	99094	A	['G']	136877	T	['C']	101385	A	['C']	30570	C	['T']	16553	T	['C']				40807	T	['C']	11325	A	['C']	10164	T	['C']	4338	T	['G']
51907	A	['G']	34416	A	['G']	122387	T	['G']	216431	G	['A']	133274	T	['C']	38620	G	['C']	17954	T	['C']				120154	G	['A']	12936	C	['T']	10369	A	['T']	9787	T	['C']
68232	T	['C']	43187	C	['T', 'G']	138653	G	['C']	233576	T	['C']	356606	A	['G']	39048	A	['C']	22325	T	['C']				157098	T	['C']	14817	G	['A']	12232	C	['T']	11142	A	['G']
77604	T	['A']	47396	T	['C']	138758	A	['C']	253507	A	['G']	443530	A	['G']	42542	T	['C']	26435	A	['C']				197228	T	['C']	19314	T	['C']	13412	A	['G']	11441	C	['T']
79249	T	['A']	50218	A	['G']	140090	C	['G']	256553	T	['C']	463728	A	['G']	43764	T	['C']	27579	T	['C']				208839	T	['C']	19367	T	['G']	13804	G	['A']	14754	C	['A']
82808	T	['C']	84695	G	['A']	144143	G	['A']	284354	G	['C']	478747	A	['G']	44233	A	['G']	33369	G	['C']				229778	C	['G']	20418	C	['T']	14905	A	['G']	14841	G	['A']
92946	T	['C']	85475	T	['C']	144162	T	['C']	290820	A	['G']	490153	A	['G']	46548	A	['G']	33601	A	['C']				277064	C	['G']	20428	G	['A']	14942	A	['G']	15168	G	['C']
96931	T	['G']	91429	G	['A']	172310	A	['G']	296065	A	['G']	524635	A	['G']	46584	T	['C']	33727	T	['G']				277401	A	['G']	20583	T	['A']	16200	T	['C']	18285	T	['G']
97189	T	['C']	94633	A	['G']	205838	T	['C']	309658	T	['G']	608259	G	['C']	55630	C	['T']	44321	T	['C']				288887	T	['C']	22853	T	['C']	16383	T	['G']	18907	G	['A']
98697	G	['A']	98690	T	['C']	210048	A	['G']	322195	G	['A']	672944	T	['C']	58245	C	['T']	48889	A	['C']				304703	T	['C']	22925	G	['A']	16956	A	['C']	19212	T	['C']
102812	G	['C']	105854	A	['G']	229549	C	['T']	385192	C	['T']	731380	T	['C']	63066	C	['T']	50878	C	['G']				313452	C	['A']	22928	T	['G']	18375	A	['G']	19870	A	['C']
105793	T	['C']	119062	C	['T']	258830	A	['G']	417671	C	['T']	790124	G	['C']	69758	G	['T']	51290	A	['G']				317953	A	['G']	24923	C	['T']	18478	A	['G']	19924	C	['A']
117812	T	['C']	133431	A	['G']	259403	C	['G']	429264	A	['G']	807754	A	['G']	75581	C	['T']	51755	C	['G']				339916	C	['G']	25258	T	['C']	19220	C	['G']	20323	C	['G']
122013	T	['C']	138732	A	['C']	280517	A	['G']	434539	A	['G']	815340	A	['G']	76381	G	['T']	52528	T	['C']				359537	C	['T']	25993	G	['A']	19774	T	['C']	23522	C	['T']
122044	C	['T']	141918	A	['G']	322971	A	['G']	444104	T	['G']	837468	T	['C']	77615	C	['T']	53261	T	['C']				365964	A	['C']	26731	C	['T']	20446	A	['G']	25689	T	['C']
142392	T	['C']	147872	T	['C']	326635	T	['C']	445259	A	['G']	841076	T	['G']	77835	T	['C']	53593	T	['G']				377936	C	['A']	29948	G	['C']	20557	T	['A']	29015	A	['G']
143489	A	['C']	147891	T	['C']	380763	T	['C']	450622	A	['C']	911577	A	['G']	84357	A	['G']	55734	G	['A']				381315	A	['G']	38806	A	['G']	20805	G	['C']	31526	G	['A']
145833	C	['T']	149165	A	['C']	386597	A	['G']	462287	A	['G']	933512	C	['A']	89379	C	['G']	57212	A	['G']				395061	G	['A']	42027	A	['G']	21151	G	['A']	33108	A	['C']
160354	T	['G']	151013	A	['G']	409929	A	['C']	492260	T	['C']	982381	T	['C']	91417	A	['G']	59046	T	['C']				421450	G	['A']	42487	A	['G']	21963	T	['G']	36061	T	['C']
161111	G	['C']	156818	T	['C']	427840	A	['G']	504541	T	['C']	1092714	C	['G']	98909	T	['C']	59372	T	['C']				445095	C	['G']	42780	A	['G']	22044	A	['G']	38338	T	['C']
172022	T	['C']	169330	A	['G']	471788	T	['C']	600851	C	['T']	1132745	A	['G']	99821	T	['G']	59926	T	['C']				446003	G	['A']	42951	T	['C']	22428	A	['C']	41212	T	['C']
184560	A	['C']	186346	G	['A']	474994	A	['G']	713883	T	['C']	1137895	T	['C']	101084	G	['A']	59970	C	['T']				448011	T	['C']	43572	G	['A']	23951	G	['A']	41631	C	['T']
194985	T	['A']	195233	A	['G']	481878	C	['G']	726771	A	['G']	1214962	A	['G']	105727	T	['C']	71909	G	['C']				449653	T	['C']	44032	C	['T']	24445	T	['G']	45206	T	['C']
203468	T	['C']	203270	A	['G']	499871	T	['C']	765971	T	['C']	1347902	G	['A']	108608	A	['G']	76469	C	['T']				458474	G	['A']	49041	C	['T']	24716	G	['A']	45721	T	['C']
208399	G	['T', 'C']	204188	T	['C']	521647	T	['C']	817503	T	['C']	1577860	C	['T']	111115	T	['A']	79260	A	['C']				484812	T	['G']	51066	G	['A']	26816	A	['G']	45789	C	['G']
211289	T	['G']	204255	G	['A']	527944	T	['G']	819785	A	['G']	1608765	A	['G']	111863	T	['G']	87055	G	['A']				506138	A	['T' 'G']	52554	A	['G']	27358	A	['G']	48856	G	['A']
212123	T	['C']	204299	T	['C']	529543	G	['C']	824965	C	['T']	1611501	T	['C']	114542	T	['C']	88127	G	['C']				521839	A	['G']	54262	C	['T']	29162	G	['C']	48925	G	['T']
217250	A	['G']	204700	T	['A']	532800	A	['G']	854975	C	['G']	1681458	T	['C']	115598	T	['C']	89330	C	['G']				551359	A	['C']	55088	G	['A']	30896	A	['G']	52402	C	['T']
233584	A	['G']	217709	G	['T']	534265	G	['A']	884537	T	['C']	1697293	T	['C']	115790	G	['T']	94643	A	['C']				553244	C	['T']	56532	C	['T']	32406	A	['G']	53152	A	['C']
245042	A	['G']	228459	T	['C']	580774	A	['C']	941023	A	['G']	1784909	A	['C']	117936	T	['C']	97140	A	['C']				559846	C	['T']	58657	C	['T']	33966	A	['G']	54015	T	['C']
262831	T	['C']	229649	G	['T']	583875	A	['G']	942045	T	['C']	1787266	T	['C']	120428	A	['G']	101649	A	['C']				582126	A	['C']	59100	T	['C']	34556	C	['T']	55760	A	['G']
269087	C	['T']	239304	T	['C']	593119	A	['C']	949565	T	['A']	1793055	T	['C']	144328	A	['G']	104306	T	['C']				593401	G	['A']	59477	G	['A']	34813	T	['C']	57054	A	['G']
277242	C	['T']	249941	A	['G']	671306	C	['G']	1046621	T	['C']	1805797	T	['G']	144631	A	['T', 'G']	104371	A	['G']				596902	A	['C']	73203	T	['C']	35504	A	['G']	57757	G	['T']
277246	A	['G']	250555	A	['G']	682265	C	['G']	1071170	G	['C']	1870637	G	['A']	156824	T	['C']	104968	T	['C']				601477	G	['A']	75567	G	['A']	35516	A	['T', 'G']	61657	G	['A']
277410	T	['C']	262338	G	['C']	682957	T	['C']	1073865	G	['A']	1905754	G	['C']	163125	G	['A']	113669	G	['C']				612744	T	['C']	76306	A	['C']	38835	A	['C']	61843	T	['C']
277584	C	['T']	264414	T	['C']	689769	G	['A']	1083654	T	['C']				169297	A	['G']	113681	T	['C']				681415	A	['T']	81069	A	['C']	40914	C	['T']	67306	C	['T']
278498	G	['A']	265925	G	['A']	703724	A	['C']	1115151	T	['G']				170645	A	['G']	113683	A	['G']				683790	T	['C']	81812	G	['A']	41741	T	['C']	68705	C	['T']
283091	C	['T']	278275	A	['G']	704640	T	['C']	1125860	A	['C']				171286	G	['A']	119441	A	['G']				726941	G	['A']	81940	C	['G']	41749	G	['A']	69399	G	['T']
285397	A	['G']	279452	A	['G']	717772	C	['T']	1141641	C	['G']				200317	A	['G']	130414	A	['C']				730244	A	['C']	82616	G	['T']	42457	A	['G']	70879	G	['A']
286902	G	['A']	280075	G	['T']	734351	A	['T']	1188471	G	['C']				201189	T	['C']	133240	T	['G']				731152	T	['C']	83021	C	['T']	42666	G	['A']	72475	T	['G']
293175	C	['T']	281045	A	['C']	745689	A	['G']	1219847	A	['G']				203501	A	['C', 'G']	139527	T	['G']				736795	G	['A']	86081	C	['T']	42806	T	['C']	72701	C	['A']
294055	T	['G']	282228	C	['T']	750710	T	['C']	1280055	G	['C']				208345	G	['A']	139722	T	['C']				744980	A	['G']	87541	A	['G']	43763	T	['C']	72893	T	['C']
294590	A	['G']	283399	T	['C']	846088	C	['A']	1286586	G	['A']				212007	G	['C']	140005	T	['C']				747135	G	['A']	91552	A	['G']	43941	A	['G']	73372	G	['A']
294737	T	['C']	294408	A	['G']	877406	T	['G']	1322030	C	['G']				218594	T	['C']	142993	G	['A']				757571	C	['T']	93501	C	['A']	44100	A	['G']	74325	T	['G']
295889	T	['A', 'C']	295256	T	['G']	909031	T	['C']	1364009	A	['G']				239081	A	['C']	146887	T	['C']				767881	C	['T']	99079	G	['A']	44251	T	['C']	75147	C	['T']
298364	A	['G']	295831	G	['T']	916909	C	['T']	1427800	T	['G']				248203	A	['T']	149384	A	['G']				769878	T	['C']	100103	C	['T']	44341	T	['C']	75368	A	['G']
302574	T	['C']	301344	T	['C']	929427	T	['G']	1427904	T	['C']				251176	T	['C']	157111	G	['A']				781157	A	['G']	102075	G	['A']	44390	T	['C']	77704	C	['A']
305275	A	['G']	302403	A	['C']	967525	G	['C']	1473270	C	['T']				251557	A	['G']	157452	G	['C']				783706	T	['G']	102150	G	['C']	44680	T	['C']	77705	T	['G']
320264	T	['C']	305809	A	['G']	978392	C	['G']	1508019	T	['C']				259294	G	['T']	179894	A	['G']				787221	T	['G']	104938	C	['G']	44683	A	['C']	78004	C	['T']
320699	T	['C']	308271	T	['C']	993236	G	['C']	1511262	A	['G']				269567	C	['G']	186479	A	['C']				821361	T	['C']	106564	T	['A']	44889	A	['G']	78693	T	['C']
326463	T	['C']	308363	G	['A']	1017815	T	['C']	1514719	T	['C']				278539	G	['T']	190347	T	['G']				889544	T	['C']	106609	G	['A']	44891	A	['G']	79068	T	['G']
326501	G	['A']	311992	A	['G']	1030718	A	['C']	1547609	G	['A']				287995	T	['G']	198794	A	['G']				891324	A	['C']	108381	G	['C']	45165	G	['C']	79814	G	['A']
333049	G	['A']	315311	G	['A']	1041052	A	['G']	1569404	A	['G']				292045	A	['T']	199321	A	['G']				912851	G	['A']	108882	G	['A']	45834	G	['C']	81903	T	['C']
333495	A	['G']	320549	T	['C']	1062515	A	['G']	1618374	C	['G']				292046	T	['C']	202427	T	['C']				931780	A	['C']	110215	G	['A']	45838	T	['C']	82231	A	['G']
336502	A	['G']	321090	A	['G']	1079877	T	['C']	1631606	A	['G']				294701	A	['G']	204803	T	['G']				932879	T	['C']	111249	G	['A']	45968	T	['C']	83841	C	['A']
340055	G	['A']	322338	C	['T']	1090297	A	['C']	1653511	T	['C']				295889	A	['T', 'C']	218849	A	['C']				950483	C	['T']	113636	G	['T']	47246	A	['G']	86108	G	['A']
341188	T	['C']	325224	G	['T']	1100627	T	['G']	1660974	A	['G']				323213	A	['G']	231550	C	['G']				956284	A	['G']	115069	T	['G']	48310	A	['C']	86232	G	['A']
358798	G	['A']	325761	T	['C']	1107292	G	['A']	1672069	A	['G']				324179	A	['C']	238625	T	['C']				966237	A	['C']	116313	A	['C']	49825	T	['C']	86690	A	['C']
365478	A	['G']	325996	A	['T']	1139926	G	['C']	1685620	A	['G']				328642	C	['T']	245021	G	['A']				967773	A	['G']	117651	T	['C']	51559	T	['C']	87762	A	['G']
367978	C	['T']	327030	A	['G']	1168854	T	['G']	1777204	T	['C']				328675	A	['G']	250943	G	['C']				983580	A	['G']	119265	T	['C']	52841	T	['C']	90624	T	['G']
397532	A	['G']	330785	A	['C']	1195484	A	['G']	1811778	T	['C']				328883	C	['T']	255702	A	['G']				992162	T	['G']	121584	G	['A']	53014	A	['G']	92912	T	['A']
406866	T	['G']	334884	G	['A']	1205420	T	['C']	1846999	T	['C']				332570	T	['G']	262358	T	['C']				992670	A	['G']	122847	C	['G']	53304	A	['G']	97509	T	['C']
406965	G	['A']	340568	C	['G']	1285908	T	['G']	1891109	T	['G']				334350	A	['G']	270408	A	['C']				994123	T	['C']	123331	G	['A']	53390	T	['C']	99221	C	['T']
410029	T	['C']	358749	T	['C']	1336499	A	['G']							340431	A	['G']	277145	A	['G']				1013433	A	['C']	126067	C	['A']	53468	A	['C']	99791	C	['G']
429092	C	['T']	361951	T	['C']	1344959	A	['G']							341025	C	['G']	278158	T	['C']				1014516	G	['A']	126729	C	['T']	53892	T	['G']	103134	T	['G']
429137	A	['G']	366825	G	['A']	1344988	C	['T']							344436	G	['A']	283292	T	['C']				1014895	T	['C']	132553	T	['A']	55326	T	['C']	104956	T	['C']
442369	T	['C']	372467	C	['G']	1368832	A	['C']							354471	G	['A']	283381	A	['G']				1015515	T	['C']	132654	C	['T']	55553	T	['C']	105695	T	['G']
467179	T	['C']	374167	A	['G']	1371774	A	['C']							354941	T	['C']	284260	T	['C']				1018084	T	['C']	134682	C	['T']	55901	A	['G']	107793	A	['G']
472323	C	['G']	374488	A	['G']	1406417	C	['T']							358418	A	['C']	284633	C	['T']				1027737	T	['C']	135105	G	['T']	56386	G	['A']	109100	T	['C']
484120	T	['C']	375189	C	['T']	1406868	T	['C']							364029	A	['G']	286208	A	['C']				1037129	T	['C']	135358	G	['A']	56593	A	['G']	110667	T	['C']
490975	G	['A']	378834	T	['C']	1424311	T	['C']							365883	G	['A']	292676	A	['C']				1059510	C	['T']	141144	C	['T']	56837	G	['A']	111257	C	['T']
492775	C	['T']	394658	C	['G']	1438927	A	['G']							372626	T	['G']	294970	T	['G']				1068777	A	['G']	141838	T	['G']	57700	A	['G']	111891	T	['C']
505840	A	['C']	396465	A	['G']	1444076	C	['T']							381961	T	['C']	295348	A	['C']				1074381	G	['T']	143170	T	['C']	58002	A	['G']	113010	A	['G']
522983	T	['G']	401745	G	['A']	1451476	A	['C']							409991	A	['C']	304779	T	['C']				1082695	T	['A']	143735	A	['C']	58024	T	['C']	114507	T	['C']
529767	T	['G']	407175	T	['C']	1469677	A	['G']							414591	A	['G']	304989	T	['C']				1094015	T	['C']	149340	G	['A' 'C']	58710	T	['C']	117769	A	['C']
531553	C	['T']	408582	C	['G']	1485583	A	['G']							421015	G	['A']	306019	T	['G']				1101561	A	['G']	149365	T	['C']	58729	G	['T']	118118	G	['A']
551294	C	['T']	410983	A	['G']	1510872	T	['C']							421173	A	['G']	306940	A	['G']				1111929	A	['C']	150968	A	['C']	59323	T	['G']	118341	T	['C']
556003	C	['T']	423370	T	['C']	1517839	A	['G']							424819	G	['A']	308325	T	['G']				1125614	T	['C']	156733	G	['A']	59382	G	['C']	119501	C	['T']
559427	A	['C']	423372	T	['C']	1527613	T	['A']							425468	A	['G']	308358	A	['G']				1136396	T	['C']	159831	A	['C']	60075	G	['A']	119586	G	['A']
561420	A	['G']	426890	T	['A']	1531590	A	['G']							428375	G	['A']	315628	G	['A']				1139704	G	['A']	163333	C	['T']	62489	G	['A']	120660	A	['C']
571140	A	['G']	430909	A	['G']	1535966	A	['G']							429428	C	['G']	316754	A	['C']				1169554	A	['G']	164861	G	['A']	67458	A	['G']	120830	T	['A']
574393	A	['C']	435670	A	['G']	1546247	A	['G']							432160	C	['T']	317904	A	['G']				1180730	A	['G']	172306	A	['G']	68975	A	['G']	123009	G	['A']
579138	T	['C', 'G']	439203	T	['G']	1551503	G	['T']							433053	G	['A']	318050	G	['A']				1230108	T	['G' 'A']	172840	C	['T']	69243	A	['G']	125284	G	['A']
588489	G	['T']	445137	T	['C']	1574533	A	['G']							435268	T	['A']	319028	A	['G']				1231163	T	['C']	172992	G	['A']	70407	T	['C']	125436	A	['T']
604230	C	['T']	450658	A	['G']	1624416	C	['A']							436157	G	['A']	319091	T	['C']				1234339	A	['G']	181632	A	['G']	71473	G	['A']	126612	G	['A']
608825	G	['A']	458577	C	['T']	1625050	G	['T']							440818	G	['A']	320323	T	['C']				1246203	T	['C']	181674	T	['C']	71502	C	['T']	131640	T	['G']
695316	T	['C']	491566	A	['G']	1659700	T	['G']							444175	T	['C']	321820	G	['A']				1279475	T	['C']	182444	G	['T']	73129	T	['C']	132260	C	['T']
726877	G	['T']	495799	T	['C']	1766432	A	['G']							444503	T	['C']	323824	T	['G']				1293094	C	['T']	185112	C	['G']	73254	A	['C']	133549	G	['C']
735261	A	['G']	508873	G	['C']	1771957	A	['G']							445742	A	['G']	325373	T	['G']				1295242	T	['C']	185242	A	['G']	73418	T	['G']	139237	A	['G']
745445	A	['G']	513483	C	['G']	1776452	A	['G']							446227	G	['A']	326340	A	['G']				1311160	G	['A']	186666	T	['G']	74601	A	['T']	140469	C	['T']
745819	A	['G']	518288	A	['G']	1818110	T	['A']							447208	C	['T']	329431	A	['G']				1327730	T	['G']	187831	G	['T']	74830	C	['A']	141608	T	['C']
756138	A	['G']	526393	A	['C']	1819048	C	['T']							447503	T	['G']	329901	T	['C']				1348705	C	['A']	189400	C	['T']	75908	A	['G']	142225	G	['A']
780838	T	['C']	534957	A	['G']	1841322	T	['C']							451775	T	['C']	332756	G	['A']				1366116	C	['G']	190098	C	['T']	76522	A	['C']	142791	C	['T']
789485	A	['G']	541277	T	['C']	1845187	A	['G']							461287	A	['C']	333851	C	['G']				1369821	C	['T']	192259	T	['C']	76679	A	['G']	143618	T	['C']
791700	C	['G']	544561	T	['G']	1853556	A	['C']							464544	T	['G']	340019	A	['G']				1372054	A	['G']	192764	G	['A']	77015	A	['C']	143772	T	['C']
813133	A	['G']	545182	G	['A']	1857293	T	['C']							467503	C	['G']	343236	G	['T']				1403685	A	['C']	195860	C	['G']	77378	A	['C']	146256	A	['G']
829788	T	['C']	581250	G	['A']	1872066	C	['T']							470982	G	['T']	343253	G	['C']				1406734	C	['T']	196278	C	['T']	77587	C	['G']	148330	T	['C']
841482	C	['G']	596090	A	['G']	1894320	A	['C']							488057	A	['G']	343330	G	['C']				1412629	C	['T']	197987	C	['T']	77802	A	['G']	148959	A	['G']
862567	A	['G']	603966	A	['G']	1896687	A	['G']							490030	T	['C']	347026	T	['C']				1420929	T	['C']	200394	C	['G']	77977	A	['C']	151058	C	['T']
876855	T	['C']	607298	G	['A']	1896932	A	['G']							491984	C	['T']	347645	T	['C']				1441429	T	['C']	200921	A	['G']	78459	C	['G']	151520	T	['C']
891488	T	['C']	671075	T	['C']	1904870	G	['A']							493576	G	['T']	356247	T	['C']				1442262	T	['C']	203501	C	['G' 'A']	78958	T	['C']	151535	T	['G']
896558	T	['G']	674124	T	['C']	1917638	C	['T']							495647	T	['C']	357484	T	['G']				1450871	G	['T']	205596	C	['G']	79105	T	['C']	156770	G	['A']
906145	G	['A']	677439	G	['T']	1933786	C	['G']							497220	T	['C']	358016	T	['C']				1505544	A	['G']	209125	T	['C']	80784	A	['C']	157886	A	['T', 'G']
908622	A	['C']	678734	T	['C']	1947018	A	['C']							501738	C	['T']	358019	G	['A']				1514148	G	['A']	211557	G	['C']	80785	A	['T']	158103	G	['A']
909469	A	['T']	697263	T	['C']	1966381	T	['G']							510635	A	['G']	358778	C	['T']				1524359	A	['G']	212734	C	['T']	80786	T	['A']	159911	T	['G']
914826	T	['G']	703721	T	['C']	1980689	T	['C']							514173	T	['C']	361879	A	['C']				1532963	T	['C']	212923	G	['A']	80787	A	['G']	160250	T	['G']
927026	T	['C']	714870	G	['A']										515545	T	['C']	370875	G	['T']				1535590	G	['A']	216231	G	['T']	80789	T	['A']	160671	C	['T']
928245	A	['G']	714984	T	['C']										518478	T	['A']	372599	G	['A']				1542100	A	['G']	218718	T	['C']	81780	A	['G']	162841	A	['G']
930431	A	['C']	717369	T	['C']										520204	A	['G']	372743	T	['C']				1545359	A	['C']	219629	G	['A']	83012	T	['C']	164970	G	['A']
933860	T	['C']	729917	A	['C']										520237	T	['C']	377746	T	['A']				1563033	T	['C']	219921	T	['C']	84341	T	['G']	181680	T	['C']
944934	T	['C']	733638	A	['G']										529959	A	['G']	378790	A	['C']				1568320	T	['G']	242355	C	['T']	86114	T	['C']	183170	T	['G']
951991	C	['T']	738064	T	['G']										530241	G	['A']	379289	C	['T']				1617848	C	['A']	244514	C	['T']	86651	T	['C']	184492	T	['C']
971676	G	['A']	738114	T	['C']										550704	A	['G']	379536	T	['C']				1631490	T	['C']	250304	G	['A']	90952	T	['C']	186968	T	['C']
987638	G	['C']	745668	A	['G']										554445	T	['C']	379679	G	['T']				1639357	G	['A']	250370	T	['A']	91618	T	['C']	190722	A	['G']
989566	G	['A']	765759	T	['C']										568603	G	['A']	382121	T	['C']				1650492	A	['G']	250552	T	['C']	91741	T	['C']	192218	A	['G']
992639	T	['C']	766309	T	['C']										576596	G	['A']	400855	C	['A']				1686801	A	['C']	251828	C	['T']	92926	T	['C']	193812	A	['G']
1003683	T	['C']	766841	A	['C']										579397	T	['C']	405953	C	['G']				1704297	C	['G']	252375	C	['T']	93481	T	['C']	195313	A	['G']
1014611	A	['G']	767779	A	['G']										582047	A	['G']	407982	G	['A']				1721181	T	['G']	256119	G	['A']	93670	T	['C']	196143	T	['G']
1024622	C	['T']	767952	A	['C']										587192	C	['T']	410817	A	['G']				1751243	T	['C']	256425	T	['C']	93904	T	['G']	196948	T	['C']
1036866	A	['G']	769442	A	['G']										595135	G	['C']	412426	G	['A']				1763695	T	['C']	257319	T	['C']	93919	A	['G']	199068	T	['G']
1039746	T	['G']	769564	G	['A']										596081	T	['C']	415080	T	['C']				1770697	T	['G']	259318	T	['A']	94223	T	['C']	200672	C	['G']
1063492	A	['G']	784777	A	['C']										597261	A	['G']	418118	A	['G']				1772148	T	['C']	261118	C	['T']	94542	T	['C']	201353	A	['C']
1085332	C	['G']	786703	A	['G']										607482	G	['A']	420451	A	['C']				1781831	A	['C']	263888	G	['A']	95860	T	['G']	202178	C	['T']
1085438	T	['C']	795266	T	['C']										666251	A	['C']	421570	G	['A']				1791686	A	['G']	265100	G	['C']	96174	A	['G']	202292	T	['A']
1090357	G	['A']	797565	A	['G']										678090	T	['G']	436001	T	['C']				1809625	A	['G']	265233	A	['C' 'G']	97125	C	['G']	204620	A	['G']
1096298	A	['G']	810963	T	['C']										679008	G	['A']	438200	T	['C']				1811330	T	['C']	266488	A	['C']	98116	T	['G']	205104	C	['T']
1107958	T	['A']	817213	A	['G']										681850	T	['C']	440687	T	['C']				1818639	A	['G']	277088	T	['A' 'G']	98600	A	['G']	205544	T	['C']
1114829	T	['G']	818403	A	['G']										690542	A	['G']	443013	T	['G']				1831678	G	['A']	277091	A	['G' 'T']	98602	T	['C']	208176	A	['C']
1117865	A	['G']	824917	A	['C']										692646	T	['C']	443452	T	['C']				1836558	T	['G']	277596	T	['G']	98664	A	['C']	208895	T	['C']
1123681	T	['C']	825839	T	['C']										696277	T	['G']	443720	T	['C']				1848635	G	['A']	279172	G	['A']	100724	A	['C']	209082	A	['G']
1138049	A	['G']	838647	A	['G']										699520	C	['T']	445446	C	['T']				1852945	T	['C']	279552	T	['C']	101289	A	['G']	209719	T	['C']
1140055	C	['T']	838977	T	['C']										711307	C	['T']	448527	A	['G']				1855229	A	['G']	281090	T	['G']	102448	T	['C']	209959	A	['C']
1145255	G	['C']	842095	G	['C']										733506	G	['T']	449662	T	['G']				1871016	G	['T']	282833	T	['C']	102609	C	['T']	210049	T	['G']
1171737	C	['T']	847086	C	['A']										752661	A	['G']	451016	G	['C']				1878227	C	['T']	283265	C	['T']	102642	G	['A']	212427	T	['C']
1177821	A	['G']	849368	G	['A']										757889	A	['G']	452847	A	['G']				1889916	T	['C']	283632	C	['T']	106475	A	['T']	213514	T	['C']
1227675	T	['A']	852032	A	['C']										763154	A	['G']	463136	T	['C']				1913397	T	['C' 'G']	284167	G	['T']	107395	A	['C']	214185	G	['A']
1238677	T	['G']	871892	C	['T']										763296	A	['G']	472467	A	['C']				1914126	A	['G']	286541	G	['A']	107426	G	['C']	214796	A	['G']
1246508	A	['C']	873795	A	['G']										765483	T	['C']	472965	G	['A']				1915277	A	['G']	286638	A	['C']	107684	G	['A']	229647	G	['A']
1251582	A	['C']	874670	T	['C']										768073	C	['A']	477047	C	['G']				1922668	A	['G']	287636	T	['C']	108237	G	['C']	233009	T	['C']
1254183	T	['G']	881166	T	['C']										773289	A	['G']	479437	T	['G']				1936349	G	['C']	289560	G	['A']	110693	T	['G']	238991	G	['A']
1259358	T	['C']	885830	T	['A']										773440	C	['G']	482023	C	['A']				1938943	C	['T']	291046	G	['A']	110964	T	['G']	244978	T	['C']
1260157	T	['C']	889743	G	['T']										774342	A	['G']	482220	T	['G']				1947791	C	['T']	291091	A	['G']	111212	A	['T']	247807	G	['A']
1267311	A	['G']	897602	C	['G']										793547	C	['G']	484450	T	['C']				1949287	A	['C']	292047	A	['C']	111544	A	['T']	250217	A	['T']
1283403	G	['A']	910692	A	['G']										798222	T	['C']	486547	G	['T']				1966837	A	['G']	293346	A	['G']	112770	A	['G']	253409	G	['A']
1291965	G	['C']	911187	C	['G']										798254	T	['C']	487973	G	['C']				1967218	A	['G']	294836	C	['G']	113782	C	['T']	255336	A	['C']
1294841	C	['T']	914772	A	['G']										815770	T	['C']	490793	T	['C']				1968321	C	['T']	295261	C	['T']	114259	C	['G']	256107	T	['C']
1314614	A	['G']	917197	G	['A']										823915	C	['T']	491050	A	['C']				1972006	A	['G']	295361	C	['G']	116085	A	['G']	256126	C	['T']
1316601	A	['G']	918566	A	['G']										834223	T	['C']	491162	T	['C']							295735	G	['A']	116161	T	['C']	260003	A	['C']
1318421	A	['G']	918792	G	['A']										839339	C	['T']	491260	T	['G']							298793	T	['C']	116268	T	['C']	263181	T	['A']
1357685	T	['C']	922864	T	['C']										839927	T	['C']	491747	A	['C']							301861	T	['G']	117922	T	['C']	263810	G	['A']
1380041	T	['C']	931939	A	['C']										845974	C	['T']	493435	T	['C']							303001	G	['C']	120353	G	['C']	263967	T	['G']
1390567	A	['G']	932353	T	['C']										846070	C	['G']	496252	G	['A']							306641	C	['A']	121372	T	['C']	264900	G	['A']
1395387	T	['G']	932777	G	['A']										847142	C	['T']	499406	C	['G']							307398	C	['T']	122654	A	['G']	268427	G	['A']
1411582	C	['T']	935992	G	['C']										850640	A	['G']	505290	A	['G']							308039	T	['A']	124506	A	['C']	269102	A	['G']
1415036	T	['C']	946951	A	['T', 'C']										870795	A	['G']	509734	G	['A']							309150	G	['A']	124534	T	['C']	270202	T	['C']
1419741	T	['G']	952307	T	['C']										875777	G	['C']	518276	G	['A']							313025	G	['C']	124861	T	['C']	270521	T	['C']
1448830	A	['G']	953283	A	['G']										878157	A	['G']	522099	G	['A']							314476	A	['G']	126335	A	['G']	277089	G	['A']
1467820	G	['A']	956401	G	['A']										878814	C	['T']	522898	A	['G']							316416	T	['G']	126385	A	['G']	277106	G	['A']
1491335	A	['G']	958811	C	['G']										880555	A	['G']	535005	T	['C']							318304	C	['T']	126884	A	['C']	277254	A	['T', 'C']
1505470	A	['G']	972868	A	['C']										885898	A	['G']	543391	A	['G']							319093	G	['A']	127006	G	['A']	280899	A	['C']
1506869	T	['G']	976912	A	['G']										887656	A	['G']	544251	A	['C']							319177	G	['A']	127816	C	['T']	281813	T	['C']
1524704	T	['G']	977033	A	['T', 'G']										890666	A	['T']	545156	A	['C']							323628	A	['G']	128027	T	['C']	281908	G	['T']
1530850	C	['T']	984278	C	['A']										920113	C	['T']	545568	T	['A']							324483	C	['G']	128115	C	['T']	283099	A	['C']
1536806	T	['C']	1000840	A	['C']										920285	A	['G']	551319	A	['G']							325395	T	['G']	129750	A	['G']	283214	G	['A']
1539848	T	['C']	1004143	A	['G']										920846	A	['C']	552759	A	['T']							325686	A	['C']	130095	T	['C']	285237	T	['C']
1542555	A	['G']	1005854	G	['A']										928114	T	['C']	553765	G	['T']							327527	G	['C']	131313	T	['C']	286140	T	['C']
1548392	T	['G']	1012137	T	['C']										936215	G	['A']	559620	A	['G']							328362	T	['G']	131549	A	['G']	286207	C	['T']
1551992	C	['A']	1017269	T	['G']										973331	C	['T']	568223	C	['G']							330992	C	['T']	132124	C	['T']	287617	A	['G']
1558397	A	['G']	1024409	A	['G']										981240	A	['G']	568391	T	['C']							333540	G	['C']	135004	C	['G']	288699	C	['T']
1565701	A	['G']	1024467	C	['T']										981669	A	['C']	568822	A	['G']							335209	T	['G']	135060	C	['G']	289841	G	['A']
1566517	A	['G']	1030776	A	['C']										992039	G	['A']	573412	T	['G']							335425	G	['C']	135333	T	['G']	293172	C	['T']
1569960	A	['G']	1033115	A	['G']										999091	A	['G']	576652	G	['T']							339904	G	['C']	135802	T	['G']	293231	T	['C']
1578018	T	['G']	1038671	C	['T']										1003526	C	['T']	580682	A	['C']							340250	A	['G']	136605	A	['G']	294971	C	['T']
1579730	A	['G']	1039348	A	['G']										1008092	T	['G']	581316	G	['A']							341105	C	['T']	136873	A	['G']	295499	T	['C']
1586691	T	['A']	1045803	G	['C']										1014400	A	['G']	581430	T	['C']							341561	A	['G']	138744	G	['C']	297468	C	['T']
1590513	T	['C']	1047533	T	['C']										1019471	T	['G']	582025	T	['C']							341863	A	['G']	138973	A	['C']	297891	T	['C']
1596161	T	['C']	1060048	A	['G']										1023781	A	['C']	582391	T	['C']							341924	G	['A']	139223	A	['C']	298123	T	['G']
1597441	T	['C']	1069436	A	['C']										1024678	T	['C']	582627	C	['A']							347555	T	['C' 'A']	139759	T	['G']	299262	A	['G']
1614941	T	['C']	1072318	C	['G']										1028544	A	['T']	586283	C	['G']							347715	A	['G']	139808	T	['G']	303397	C	['T']
1617751	G	['A']	1074222	T	['C']										1029889	A	['G']	587894	T	['C']							347806	G	['A']	139883	A	['C']	306374	T	['C']
1618544	C	['T']	1075217	A	['G']										1033753	G	['A']	590336	A	['G']							349523	A	['C']	140330	T	['C']	306441	T	['G']
1631623	A	['G']	1077172	T	['G']										1040250	T	['C']	593708	T	['C']							349597	A	['G']	140741	A	['G']	310286	T	['C']
1631738	A	['G']	1081759	G	['A']										1073102	T	['A']	594965	A	['G']							352516	G	['C']	141437	C	['T']	311002	A	['T']
1635920	C	['T']	1087580	T	['C']										1074853	T	['G']	597262	T	['C']							353076	G	['A']	141748	A	['G']	311074	C	['A']
1661051	A	['G']	1088187	A	['G']										1075697	G	['A']	598193	A	['G']							355031	A	['G']	142260	T	['C']	311691	A	['G']
1672494	C	['T']	1088604	A	['G']										1077670	C	['T']	603006	T	['C']							355455	A	['G']	142859	T	['C']	311695	G	['C']
1674999	A	['G']	1090564	T	['C']										1082620	C	['G']	604194	A	['G']							355458	G	['C']	143161	T	['C']	312438	T	['C']
1679241	A	['G']	1095983	A	['G']										1094504	A	['G']	604404	A	['G']							355462	A	['C']	143317	T	['C']	312439	T	['C']
1679347	A	['G']	1098195	A	['G']										1094612	A	['G']	609884	A	['G']							356566	G	['A']	143749	T	['C']	313588	C	['T']
1683489	A	['G']	1098623	T	['C']										1098813	T	['C']	610327	T	['C']							356991	C	['T']	143950	G	['A']	314754	A	['C']
1698944	A	['G']	1100647	A	['G']										1099170	A	['G']	672376	T	['C']							357574	C	['T']	144405	T	['G']	316171	A	['T']
1708985	C	['T']	1100674	G	['A']										1102395	C	['G']	676273	G	['T']							360960	C	['T']	144673	T	['C']	316207	C	['G']
1711215	A	['G']	1104321	A	['G']										1104984	T	['G']	676761	A	['G']							365036	G	['A']	145566	T	['C']	317225	T	['C']
1714412	A	['C']	1110196	T	['C']										1110694	T	['C']	678692	A	['G']							366571	T	['C']	145591	T	['C']	320370	T	['C']
1725335	A	['G']	1116402	C	['A']										1120669	G	['C']	679487	T	['C']							368411	C	['G']	145677	G	['A']	322776	T	['C']
1725432	C	['T']	1132741	T	['C']										1126435	G	['C']	680508	G	['A']							372689	T	['G']	145900	T	['C']	322943	A	['C']
1728241	A	['G']	1144278	C	['T']										1134403	C	['T']	680945	A	['G']							373283	A	['G']	148261	G	['C']	324466	A	['C']
1732123	C	['G']	1146587	T	['C']										1135705	A	['G']	689134	A	['G']							375946	A	['G']	149159	T	['G']	324879	T	['G']
1768596	G	['A']	1151203	A	['G']										1137299	G	['A']	694062	A	['C']							376678	C	['G' 'T']	149340	C	['A', 'G']	327350	T	['G']
1775501	G	['A']	1165871	T	['G']										1148201	G	['C']	700208	C	['G']							377887	C	['T']	149387	A	['G']	327878	A	['C']
1775630	A	['G']	1166951	A	['G']										1166812	T	['C']	701744	C	['T']							379058	G	['A']	149705	G	['C']	333685	A	['G']
1789310	T	['C']	1167283	T	['C']										1169619	G	['A']	703344	T	['C']							380459	C	['T']	150039	T	['C']	333688	T	['C']
1801465	A	['G']	1177990	A	['G']										1173580	A	['C']	714492	A	['G']							384205	G	['T']	150574	A	['C']	333689	T	['A']
1806976	A	['G']	1181159	C	['T']										1193695	G	['C']	724370	A	['C']							386648	A	['G']	151476	T	['C']	333691	G	['A']
1833046	A	['G']	1192799	A	['G']										1202285	T	['C']	724740	C	['T']							386804	A	['G']	156183	C	['T']	333694	C	['T']
1838962	A	['G']	1201587	T	['C']										1203289	A	['G']	726018	T	['C']							390179	A	['G']	156423	T	['C']	334064	A	['G']
1855467	T	['C']	1205510	T	['C']										1204429	A	['G']	733940	T	['G']							395452	A	['G']	156424	C	['G']	334266	G	['A']
1870957	C	['A']	1205721	A	['G']										1204930	T	['C']	734532	A	['G']							396745	C	['T']	156687	T	['C']	335290	C	['T']
1871004	T	['C']	1207438	A	['G']										1223302	A	['G']	734545	T	['G' 'C']							398140	G	['C']	156766	T	['A']	337469	C	['T']
1871571	G	['A']	1214383	T	['C']										1224709	T	['C']	751150	A	['G']							401343	C	['T']	158915	T	['G']	339126	T	['C']
1889398	T	['C']	1214852	C	['T']										1225832	T	['G']	752572	A	['C']							405831	G	['C']	159206	A	['C']	339384	G	['A']
1895285	C	['T']	1216730	A	['G']										1226666	C	['T']	759210	A	['G']							406787	G	['C']	159575	A	['G']	339856	A	['C']
1908400	C	['T']	1233899	A	['G']										1231562	A	['G']	770145	A	['C']							408757	G	['A']	159774	T	['G']	341541	G	['C']
1918033	A	['G']	1236556	A	['G']										1235417	T	['C']	774837	G	['A']							410702	C	['A']	159928	A	['G']	343953	G	['T']
1926947	T	['C']	1237845	C	['T']										1239236	A	['G']	777734	G	['A']							416188	G	['A']	160059	T	['C']	347237	T	['C']
1927244	C	['G']	1251709	G	['A']										1240712	G	['A']	780454	G	['A']							417081	A	['G']	161159	C	['T']	349112	A	['C']
1927267	T	['C']	1255567	A	['G']										1242890	T	['G']	780621	A	['C']							417116	C	['T']	162580	A	['G']	352716	A	['G']
1944255	C	['T']	1255635	T	['C']										1244257	G	['C']	783268	A	['C']							419310	G	['A']	163489	A	['T']	353312	T	['C']
1951063	T	['A']	1259829	T	['C']										1246441	T	['A']	783545	G	['C']							420936	A	['G']	163650	C	['T']	354523	T	['C']
1957823	T	['A']	1277667	G	['T']										1247928	G	['A']	783604	A	['C']							420959	C	['T']	164332	C	['G']	355042	A	['C']
1963714	G	['A']	1278039	G	['T']										1250919	T	['G']	787246	C	['G']							423899	T	['C']	165042	A	['G']	360091	A	['G']
1968565	A	['G']	1285827	T	['C']										1251153	A	['C']	790054	G	['A']							425550	G	['A']	169238	C	['T']	362118	T	['C']
1969320	A	['G']	1286450	T	['C']										1278611	A	['C']	790344	T	['G']							426401	T	['G']	170646	T	['C']	364251	C	['T']
1980323	A	['G']	1288704	G	['C']										1280309	G	['T']	790717	A	['T']							427637	C	['A']	172850	A	['G']	368327	C	['T']
			1296798	C	['T']										1280320	T	['C']	791872	C	['G']							428131	T	['C']	172959	T	['G']	368821	T	['C']
			1302720	G	['A']										1283564	A	['G']	796828	A	['G']							433546	G	['C']	180407	C	['G']	371041	T	['G']
			1307493	C	['G']										1285832	G	['C']	812422	T	['G']							436179	G	['A']	181219	T	['C']	371153	T	['C']
			1320083	T	['C']										1287322	C	['T']	812535	A	['T']							442941	G	['C']	181234	A	['G']	372758	A	['G']
			1327062	A	['G']										1287859	A	['C']	812993	T	['C']							447808	C	['G']	182401	T	['C']	373582	A	['T']
			1332834	T	['A']										1288010	C	['T']	815216	T	['C']							451895	C	['T']	182719	C	['T']	374498	A	['G']
			1339118	T	['C']										1293459	T	['C']	819483	C	['A']							453333	C	['G']	182910	C	['G']	376263	T	['C']
			1339482	A	['C']										1298958	C	['T']	821466	A	['G']							454766	G	['A']	183131	C	['T']	377414	A	['G']
			1343681	T	['G']										1302410	A	['G']	822363	A	['C']							457229	A	['T']	183211	A	['G']	378056	T	['C']
			1344604	T	['C']										1306112	C	['T']	822814	T	['C']							458671	A	['G']	184164	A	['C']	381902	T	['C']
			1344748	G	['C']										1307119	G	['C']	823885	T	['G']							459235	T	['C']	184409	A	['C']	386862	T	['C']
			1347319	G	['C']										1316703	A	['G']	824210	T	['C']							468718	C	['T']	184739	C	['G']	393066	G	['A']
			1347892	G	['C']										1316949	C	['G']	824633	G	['A']							469940	G	['C']	184789	A	['G']	398845	T	['C']
			1352417	A	['G']										1318998	C	['T']	834741	T	['C']							472141	A	['G']	185674	G	['C']	401061	G	['T']
			1358599	A	['G']										1319884	T	['C']	836732	T	['A']							474897	C	['T']	186632	G	['A']	401820	C	['G']
			1364002	A	['G']										1323652	A	['G']	837920	C	['T']							479439	C	['T']	186871	T	['C']	404266	T	['C']
			1369985	T	['C']										1339546	T	['C']	838492	T	['C']							479505	G	['A']	187195	T	['C']	407171	G	['A']
			1375030	T	['C']										1347299	A	['G']	840040	G	['T']							480216	T	['C']	187804	A	['G']	407547	T	['G']
			1377577	T	['C']										1353268	T	['C']	841327	A	['G']							480323	C	['G']	187825	G	['C']	407994	G	['A']
			1379029	G	['C']										1363738	C	['A']	844715	T	['G']							482514	C	['T']	188239	A	['C']	408537	T	['C']
			1384542	G	['A']										1366162	G	['A']	847042	A	['G']							482979	G	['T']	188871	T	['G']	411695	A	['G']
			1394839	A	['G']										1366623	T	['C']	847393	G	['A']							483457	T	['G']	189494	A	['G']	412220	A	['C']
			1396659	G	['T']										1368942	T	['C']	851563	C	['T']							484458	G	['A']	189539	G	['A']	414795	A	['T']
			1398890	A	['G']										1373163	C	['A']	860403	G	['A']							485935	G	['A']	190284	A	['G']	414903	A	['G']
			1404392	T	['C']										1385037	T	['C']	864583	C	['T']							486989	A	['G']	190412	G	['A']	415040	A	['G']
			1414409	A	['T']										1398108	A	['G']	865056	T	['G']							487618	T	['C']	192128	T	['C']	417764	T	['C']
			1414524	A	['G']										1400487	T	['C']	872153	T	['C']							488569	T	['C']	193206	T	['A']	419566	T	['G']
			1415546	A	['G']										1405532	T	['G']	874637	T	['C']							489611	C	['A']	193399	G	['T']	421962	A	['G']
			1415904	A	['C']										1406931	G	['A']	877850	A	['G']							492175	C	['G']	193734	A	['G']	421965	A	['C']
			1416889	C	['T']										1407867	A	['G']	879608	T	['C']							494724	G	['A']	193916	T	['C']	422567	A	['G']
			1429560	C	['T']										1410438	A	['C']	880965	T	['C']							498004	T	['C']	194112	T	['G']	423847	T	['C']
			1430456	A	['G']										1411538	G	['C']	889791	C	['T']							500222	C	['T']	194692	A	['G']	423972	A	['G']
			1436449	T	['C']										1418912	G	['C']	890138	T	['G']							500857	A	['G']	194780	T	['C']	424149	G	['A']
			1436587	G	['A']										1419666	T	['C']	892984	T	['G']							503709	C	['T']	194926	G	['C']	430373	C	['T']
			1436861	T	['A']										1422472	G	['A']	894532	A	['G']							504235	G	['C']	195003	G	['T']	432861	C	['T']
			1438436	A	['G']										1426437	G	['C']	895156	G	['C']							514720	G	['T']	195027	G	['C']	434451	G	['C']
			1446100	G	['T']										1434736	C	['T']	895495	A	['G']							518181	C	['T']	195124	G	['A']	434746	A	['G']
			1446262	T	['C']										1436791	A	['G']	905472	A	['G']							519272	G	['A']	195447	T	['C']	434840	C	['T']
			1447397	C	['T']										1443053	C	['T']	905652	G	['C']							519525	T	['C']	196777	T	['C']	439679	A	['G']
			1450853	T	['C']										1462520	T	['C']	906592	A	['G']							519673	G	['A']	197081	A	['G']	441684	A	['G']
			1451130	A	['T']										1463126	A	['G']	908246	A	['C']							520267	C	['G']	197176	C	['T']	443556	A	['T', 'C']
			1457666	A	['G']										1468226	A	['G']	909418	T	['A']							521984	A	['C']	197210	A	['G']	444834	A	['G']
			1459733	C	['T']										1476183	C	['T']	912749	T	['G']							523364	C	['T']	197270	G	['T']	448231	C	['G']
			1466715	T	['C']										1488476	A	['G']	913008	C	['A']							523651	C	['A']	197376	A	['G']	448284	T	['C']
			1472573	C	['A']										1510696	A	['C']	914435	G	['C']							524834	G	['A']	198539	G	['A']	449058	G	['A']
			1474967	A	['T']										1511555	A	['G']	916238	T	['C']							528879	G	['A']	198730	T	['C']	450763	A	['C']
			1476169	T	['G']										1512013	T	['C']	917522	T	['C']							531647	G	['A']	198793	T	['A']	452237	C	['T']
			1479617	A	['G']										1529642	T	['C']	924332	T	['C']							533658	G	['A']	199784	A	['G']	452592	T	['C']
			1483642	A	['G']										1540902	A	['G']	930316	T	['G']							534346	C	['G']	199924	T	['G']	453780	C	['T']
			1484707	G	['A']										1548999	C	['A']	930982	C	['A']							535017	G	['T']	200776	A	['G']	453968	C	['T']
			1490484	C	['G']										1549826	C	['T']	931046	A	['G']							535811	G	['A']	200786	T	['C']	454926	A	['C']
			1496389	A	['G']										1549912	G	['C']	931099	G	['A']							537136	G	['C']	200838	A	['C']	455569	A	['G']
			1508899	A	['G']										1550871	A	['C']	934653	A	['C']							542729	A	['C']	201129	G	['A']	456729	A	['G']
			1517126	A	['G']										1552111	C	['T']	936892	T	['G']							542885	T	['G']	201483	T	['G']	457322	A	['G']
			1517750	A	['G']										1566609	G	['T']	938195	C	['T']							543233	G	['T']	204292	T	['C']	459143	G	['A']
			1522197	A	['G']										1592077	T	['G']	940545	T	['G']							543301	G	['C']	204419	A	['C']	459860	C	['T']
			1531942	C	['T']										1597647	C	['T']	941650	A	['C']							543385	A	['G']	204769	C	['T']	460278	T	['C']
			1545049	G	['C']										1599471	A	['G']	946589	A	['G']							547082	G	['C']	205464	A	['G']	461842	T	['G']
			1545158	C	['A']										1611122	T	['C']	949195	C	['T']							547600	C	['G']	208910	T	['C']	467940	C	['T']
			1550311	T	['C']										1622829	T	['C']	949911	A	['C']							550693	G	['A']	209195	A	['G']	470134	T	['G']
			1551723	A	['G']										1625651	T	['C']	950756	A	['C']							551102	T	['C']	211570	A	['G']	470685	T	['G']
			1553022	A	['C']										1655240	G	['A']	950782	G	['A']							551104	C	['T']	212932	G	['A']	470931	A	['C']
			1558536	T	['C']										1657524	A	['G']	951684	T	['G']							551105	T	['C']	213913	A	['G']	472060	T	['C']
			1568610	C	['G']										1667717	T	['A', 'G']	955794	A	['C']							551908	C	['A']	214165	A	['G']	475948	C	['A']
			1571206	A	['G']										1670608	C	['G']	956088	A	['C']							555504	A	['C']	214927	T	['C']	477464	T	['C']
			1579606	T	['C']										1677867	A	['G']	956628	T	['G']							559509	G	['A']	214941	T	['C']	478707	T	['G']
			1587022	T	['C']										1678548	G	['A']	967001	C	['T']							561793	G	['T']	215269	A	['C']	481831	A	['G']
			1591867	T	['G']										1678998	T	['C']	967636	A	['C']							571933	G	['A']	216671	T	['C']	482675	A	['C']
			1600049	T	['G']										1682942	C	['A']	968235	A	['C']							572126	G	['A']	217793	T	['C']	483563	T	['G']
			1605208	A	['T']										1683262	A	['C']	971646	C	['T']							576438	G	['A']	218398	A	['G']	484073	T	['C']
			1609749	T	['C']										1683774	A	['G']	971652	T	['G']							578441	G	['A']	218729	A	['G']	484341	T	['C']
			1618199	T	['C']										1686727	C	['T']	972288	T	['G']							578982	G	['A']	218807	G	['C']	486140	T	['G']
			1618788	A	['G']										1699689	C	['T']	972790	G	['T']							580186	C	['G']	228601	A	['G']	486473	A	['C']
			1621439	T	['C']										1699690	T	['C']	972887	A	['G']							584606	C	['G']	230332	G	['A']	487013	C	['A']
			1624559	G	['A']										1718929	G	['A']	974585	T	['G']							589725	C	['T']	232170	A	['G']	487111	T	['C']
			1625504	T	['G']										1723898	A	['G']	975616	A	['G']							590490	T	['C']	232780	T	['C']	488943	T	['C']
			1625525	T	['C']										1724004	A	['G']	983531	A	['C']							591242	G	['A']	232994	A	['T']	489507	T	['C']
			1630379	C	['T']										1724943	T	['C']	983585	G	['T']							591301	A	['G']	233159	T	['C']	491860	A	['G']
			1637039	A	['G']										1727120	A	['G']	987541	G	['C']							592090	T	['C']	239001	T	['C']	492168	A	['T']
			1649975	G	['C']										1731571	C	['T']	993348	A	['G']							593439	G	['A']	239348	A	['C']	492994	A	['G']
			1654831	G	['C']										1741667	T	['C']	995401	T	['G']							596775	C	['G']	242235	G	['A']	493405	T	['G']
			1664385	T	['C']										1758425	C	['T']	996512	G	['C']							600128	T	['C']	242527	G	['C']	496359	G	['A']
			1676180	A	['G']										1758520	A	['G']	999389	T	['C']							600261	A	['G']	244769	T	['C']	499947	A	['C']
			1676738	C	['T']										1758979	T	['C']	1002773	T	['C']							601723	G	['T']	245694	T	['C']	500643	T	['C']
			1683810	A	['C']										1759689	A	['G']	1003360	T	['C']							607374	A	['G']	247317	C	['T']	506705	C	['T']
			1683840	A	['G']										1762058	T	['G']	1004248	T	['G']							607390	G	['A']	247397	A	['C']	509484	T	['G']
			1687333	A	['G']										1775202	A	['G']	1005264	G	['C']							607885	G	['A']	248850	G	['A']	514368	A	['C']
			1697938	T	['C']										1778837	G	['C']	1015476	A	['C']							610033	A	['C']	248896	C	['G']	515537	T	['G']
			1711433	T	['G']										1779283	T	['C']	1017205	G	['T']							613801	C	['T']	249580	A	['G']	515784	A	['G']
			1720135	A	['G']										1780104	A	['C']	1017375	A	['G']							665815	C	['A']	249835	T	['C']	517151	A	['C']
			1726928	T	['G']										1784451	A	['C']	1017673	T	['G']							673339	C	['G']	249973	A	['G']	517848	C	['T']
			1727666	T	['G']										1805900	G	['A']	1039312	A	['G']							675412	C	['T']	251505	T	['C']	518367	A	['G']
			1740814	T	['C']										1805942	A	['G']	1040182	T	['C']							676242	G	['A']	255465	T	['C']	521714	T	['C']
			1745865	G	['A']										1809435	T	['C']	1041106	A	['G']							679059	C	['T']	255831	T	['C']	526002	G	['A']
			1750219	G	['A']										1809642	G	['A']	1043898	T	['C']							683094	G	['A']	255912	T	['C']	526924	A	['G']
			1752553	T	['C']										1813835	T	['G']	1045254	T	['G']							684480	T	['C']	256486	T	['G']	531062	G	['A']
			1752864	A	['G']										1817453	C	['G']	1047970	T	['G']							685958	G	['A']	256978	T	['C']	531490	A	['G']
			1753465	C	['T']										1819096	T	['A', 'C']	1059324	T	['C']							686045	G	['A']	258821	T	['C']	534634	G	['A']
			1754794	A	['G']										1834810	A	['G']	1062069	T	['C']							688040	T	['G']	258982	A	['G']	534793	A	['C']
			1759045	T	['C']										1837034	T	['C']	1062998	C	['T']							691602	C	['T']	261304	T	['C']	534813	C	['T']
			1768747	T	['G']										1846827	C	['T']	1064771	T	['G']							696473	C	['T']	262967	T	['G']	536107	T	['G']
			1769690	A	['G']										1849508	G	['A']	1065448	T	['C']							697789	C	['G']	263772	A	['G']	536427	G	['A']
			1777131	C	['T']										1850118	T	['G']	1069566	A	['C']							699665	A	['C']	264191	A	['G']	538138	A	['G']
			1780145	A	['G']										1852865	T	['G']	1074234	T	['G']							700118	A	['C']	264380	T	['G']	538474	A	['G']
			1782575	A	['G']										1855866	A	['T']	1077232	G	['A']							701416	G	['A']	264697	A	['C']	539224	T	['C']
			1783327	T	['C']										1856411	T	['A', 'G']	1077484	T	['C']							704073	C	['T']	265604	T	['C']	539406	T	['G']
			1784339	A	['G']										1860879	A	['G']	1079638	A	['C']							704663	G	['T']	265841	A	['C']	539435	C	['T']
			1784796	C	['G']										1860909	G	['A']	1079880	A	['C']							704672	T	['C']	266075	T	['C']	541484	A	['G']
			1784861	C	['T']										1866081	A	['G']	1089567	A	['C']							705186	G	['A']	268682	T	['C']	541796	G	['A']
			1788457	A	['C']										1866907	G	['C']	1092378	T	['C']							710114	T	['C']	269132	A	['T']	544438	C	['G']
			1792308	A	['G']										1868054	T	['C']	1092416	T	['C']							710929	C	['T']	269656	T	['C']	546713	T	['C']
			1797708	T	['C']										1869731	A	['G']	1094442	A	['G']							711242	T	['G']	269983	A	['G']	547088	A	['G']
			1798176	T	['C']										1883385	T	['C']	1094767	G	['A']							714385	C	['T']	273219	T	['C']	548054	T	['G']
			1804757	C	['A']										1884013	T	['C']	1094959	T	['C']							714419	A	['G']	273374	C	['T']	551219	C	['A']
			1807586	A	['G']										1886653	T	['C']	1095635	A	['G']							717058	A	['G']	276343	C	['A']	554662	C	['T']
			1815242	A	['C']										1889457	T	['C']	1099775	A	['G']							723025	C	['T']	277086	T	['C']	555057	A	['G']
			1817560	C	['G']										1890572	C	['T']	1101694	C	['T']							724365	T	['G']	277093	A	['G']	570666	T	['C']
			1832744	A	['G']										1891182	A	['T']	1104991	T	['G']							725986	C	['A']	277243	G	['A']	571637	A	['G']
			1844476	A	['G']										1910706	T	['C']	1112232	G	['C']							726875	A	['G']	277251	T	['C']	573567	G	['A']
			1846830	A	['T']										1913610	C	['A', 'G']	1113813	A	['G']							729573	A	['C']	277595	A	['G']	575568	T	['C']
			1846996	G	['A']										1919556	C	['T']	1120722	A	['C']							732058	C	['G']	278361	A	['G']	577965	G	['A']
			1847197	G	['C']										1926928	G	['C']	1120915	T	['C']							734486	G	['T']	280150	T	['G']	579211	A	['G']
			1865511	T	['C']										1940129	C	['T']	1124912	T	['C']							735730	A	['T']	280550	A	['G']	579810	T	['C']
			1867284	A	['G']										1945393	G	['A']	1132877	T	['G']							737413	C	['T']	280936	T	['C']	579945	A	['C']
			1867855	T	['C']										1949239	A	['C']	1134145	C	['T']							743812	C	['T']	280997	T	['C']	582447	A	['G']
			1868166	G	['A']										1954301	A	['G']	1137031	A	['G']							746998	G	['A']	282236	T	['G']	583085	A	['G']
			1868509	T	['C']										1956418	A	['G']	1138561	T	['C']							750772	G	['A']	283327	A	['G']	585470	C	['T']
			1879524	T	['C']										1964156	G	['A']	1139751	C	['T']							751923	G	['A']	283739	T	['G']	585491	T	['G']
			1891449	T	['C']										1978886	T	['C']	1141558	T	['C']							753746	C	['G']	284253	T	['G']	585613	C	['T']
			1904615	C	['G']										1980708	C	['T']	1142120	A	['T']							762632	C	['G']	285047	A	['G']	587385	G	['A']
			1908178	C	['T']										1981266	G	['A']	1143885	T	['C']							763495	G	['A']	285616	A	['G']	587653	T	['C']
			1910960	A	['G']										1982413	A	['G']	1149858	T	['G']							766237	G	['A']	285625	C	['T']	589674	C	['T']
			1911460	T	['C']													1161457	A	['G']							767750	C	['T']	285948	T	['C']	591550	A	['C']
			1913614	T	['A', 'C']													1166606	A	['C']							770003	C	['T']	286038	T	['C']	591904	T	['C']
			1913619	A	['C']													1168110	G	['T']							772292	A	['G']	286276	A	['G']	592455	A	['G']
			1914231	T	['C']													1171453	T	['G']							774158	T	['C']	287210	A	['G']	593303	A	['G']
			1915059	T	['C']													1175289	A	['C']							777588	G	['C']	287666	C	['T']	593910	T	['G']
			1917477	T	['G']													1181873	A	['C']							780353	C	['T']	287779	T	['C']	594211	G	['A']
			1920563	A	['C']													1182099	A	['C']							782183	G	['C']	288002	T	['C']	595605	A	['G']
			1920855	C	['T']													1182448	C	['T']							782355	A	['G']	289452	G	['A']	598170	G	['A']
			1921011	G	['T']													1197571	C	['T']							783831	T	['C']	289816	A	['G']	598292	T	['C']
			1921025	G	['A']													1201500	C	['T']							783898	C	['G']	290100	A	['G']	599644	A	['G']
			1924881	T	['C']													1202328	G	['A']							784407	G	['C']	290276	T	['G']	605271	A	['G']
			1939969	A	['G']													1203184	C	['T']							785197	T	['G']	292539	T	['C']	605277	A	['T']
			1940689	T	['C']													1206282	C	['T']							787041	C	['T']	292891	T	['G']	608152	A	['G']
			1943501	T	['G']													1224535	C	['G']							787971	G	['A']	292963	C	['T']	609916	C	['T']
			1944771	A	['G']													1226268	T	['C']							791085	G	['C']	293130	T	['C']	612736	T	['G']
			1947655	T	['C']													1226527	A	['G']							794567	A	['C']	293852	T	['C']	666892	C	['T']
			1947885	A	['G']													1228436	A	['C']							795239	T	['G']	293964	A	['G']	666895	T	['C']
			1948452	G	['A']													1229099	T	['C']							796705	A	['C']	293999	A	['G']	672328	G	['A']
			1948512	A	['G']													1229419	C	['T']							806963	T	['C']	294782	A	['G']	675640	T	['C']
			1949791	A	['G']													1230269	G	['T']							807427	G	['A']	295317	A	['T']	678577	A	['G']
			1958034	G	['C']													1236554	T	['C']							809656	C	['T']	295332	T	['C']	678578	T	['G']
			1962629	C	['G']													1239487	T	['C']							810756	A	['G']	295552	A	['G']	679877	T	['G']
			1969110	A	['G']													1239546	G	['A']							813430	G	['A']	295665	T	['G']	679897	T	['C']
			1974124	A	['C']													1239704	A	['G']							817922	C	['T']	296207	C	['T']	680396	A	['C']
			1978826	T	['G']													1240873	T	['G']							819577	G	['A']	296278	A	['G']	680493	G	['A']
			1982051	T	['C']													1242599	C	['G']							828595	A	['G']	296511	A	['C']	681991	T	['G']
			1987073	A	['G']													1248766	C	['G']							829813	T	['C']	297433	G	['A']	682498	A	['G']
			1989927	T	['C']													1250607	G	['A']							834150	G	['C']	298068	G	['A']	684582	A	['C']
																		1252700	A	['G']							834665	G	['A']	298071	C	['G']	684907	G	['A']
																		1253077	T	['G']							835174	T	['C']	300856	T	['C']	685324	T	['C']
																		1253687	T	['C']							836219	A	['C']	301697	A	['G']	685836	T	['C']
																		1254306	T	['C']							837786	A	['G']	302375	A	['G']	685989	A	['G']
																		1254525	A	['T']							839607	T	['C']	303287	A	['G']	690483	T	['C']
																		1256023	A	['C']							840267	G	['A']	304988	T	['C']	693791	A	['G']
																		1256205	A	['G']							842048	C	['G']	306407	A	['C']	697837	G	['A']
																		1258267	T	['C']							843175	C	['T']	306425	A	['G']	698555	G	['T']
																		1260011	C	['T']							843928	G	['A']	307809	T	['C']	698603	A	['C']
																		1261110	T	['G']							845338	C	['T']	307829	A	['G']	700569	T	['C']
																		1265772	T	['G']							845856	G	['C']	308359	A	['G']	700617	A	['G']
																		1265997	T	['C']							846544	G	['T']	308386	A	['G']	702860	G	['A']
																		1269846	C	['T']							846659	C	['T']	308583	C	['T']	703437	T	['C']
																		1270116	C	['G']							847391	T	['C']	310785	G	['A']	705229	T	['C']
																		1273757	A	['C']							847846	C	['T']	311223	T	['C']	705767	G	['C']
																		1274003	T	['G']							848223	T	['C']	311295	A	['G']	706067	A	['G']
																		1279937	G	['A']							848452	C	['G']	311321	T	['G']	708829	A	['G']
																		1281325	A	['C']							848580	G	['C' 'T']	312655	G	['A']	710161	A	['G']
																		1282077	A	['C']							854938	T	['A']	312896	T	['A']	710657	T	['G']
																		1286579	G	['A']							856634	A	['G']	313448	G	['A']	718337	G	['A']
																		1287635	A	['C']							861901	C	['G']	314507	A	['G']	725472	C	['T']
																		1289912	C	['T']							862399	G	['C']	316054	C	['T']	725857	G	['A']
																		1295855	C	['T']							864513	A	['T']	316307	A	['G']	726345	G	['A']
																		1296114	T	['C']							871606	C	['G']	316480	A	['T']	727475	C	['T']
																		1297176	T	['C']							871808	C	['T']	316489	T	['C']	728758	C	['T']
																		1299092	A	['C']							872797	C	['T']	316513	A	['G']	731102	G	['T', 'C']
																		1299864	T	['G']							873774	C	['T']	317057	T	['C']	734698	A	['G']
																		1305400	A	['G']							874612	G	['A']	317881	C	['T']	735448	A	['C']
																		1309726	G	['C']							876775	C	['A']	318830	A	['G']	736946	A	['C']
																		1313222	C	['T']							876799	C	['T']	319699	A	['G']	738145	A	['G']
																		1313951	T	['G']							877088	C	['G']	320387	A	['C']	744074	A	['C']
																		1315618	T	['G']							877722	G	['A']	320580	A	['G']	747313	G	['A']
																		1319056	C	['G']							879498	C	['G']	322385	T	['C']	748048	G	['A']
																		1319697	T	['G']							880095	G	['T']	324156	T	['C']	749630	T	['C']
																		1323299	A	['C']							880321	G	['A']	325121	A	['C']	749776	C	['T']
																		1327193	T	['C']							880628	A	['T']	325176	T	['C']	751289	G	['A']
																		1327976	C	['T']							882399	G	['T']	325301	T	['C']	753829	C	['T']
																		1329457	A	['C']							885123	G	['A']	325340	A	['G']	753887	A	['C']
																		1329623	G	['A']							885233	G	['A']	325401	G	['A']	753954	A	['G']
																		1331902	A	['C']							885592	G	['A']	326150	T	['C']	756299	G	['A']
																		1333096	T	['C']							885866	C	['T']	326581	A	['G']	758414	T	['G']
																		1333805	A	['G']							886924	G	['A']	328861	T	['C']	759981	T	['C']
																		1343833	A	['C']							887051	A	['C']	328955	T	['C']	760255	T	['C']
																		1344275	G	['T']							887135	G	['A']	331622	A	['G']	760338	T	['C']
																		1345337	T	['C']							889531	G	['A']	332321	T	['C']	760537	T	['G']
																		1345680	T	['G']							889749	C	['T']	332671	T	['G']	760589	A	['T']
																		1345862	A	['G']							891935	G	['T']	334492	A	['G']	762202	T	['C']
																		1346445	T	['G']							892968	A	['C']	335845	T	['C']	763064	C	['T']
																		1347752	T	['G']							894065	T	['A']	337161	A	['C']	764162	A	['C']
																		1349205	G	['A']							895358	A	['C']	337646	T	['C']	764403	A	['C']
																		1352921	A	['G']							897729	A	['G']	338272	A	['C']	764803	G	['A']
																		1358563	A	['G']							904817	G	['A']	339167	A	['G']	765728	T	['C']
																		1360922	T	['C']							908003	A	['C']	339398	G	['A']	766260	G	['T']
																		1365639	A	['C']							910807	T	['G']	340326	T	['G']	767634	T	['C']
																		1368585	A	['G']							911184	G	['T']	341142	T	['C']	768538	G	['A']
																		1369693	A	['G']							911782	G	['C']	341217	T	['C']	769262	G	['C']
																		1371934	T	['G']							912852	T	['C']	341609	G	['A']	770221	A	['G']
																		1372845	C	['T']							912983	G	['A']	341850	C	['T']	770358	T	['C']
																		1377076	T	['C']							913174	T	['C']	341980	A	['G']	771334	T	['C']
																		1377493	C	['T']							914924	C	['T']	343691	G	['C']	773669	T	['C']
																		1390419	T	['C']							915222	A	['G']	343971	A	['G']	776325	C	['G']
																		1390485	A	['G']							915792	A	['C']	344497	T	['G']	776554	G	['A']
																		1401827	T	['G']							919928	G	['A']	344644	A	['G']	777718	G	['A']
																		1403611	A	['C']							921554	C	['G']	347555	A	['T', 'C']	777779	C	['T']
																		1404076	T	['G']							921661	G	['A']	349761	A	['G']	778102	A	['C']
																		1404754	A	['C']							924885	T	['C']	349820	G	['A']	779673	T	['C']
																		1406109	T	['G']							925045	T	['C']	353252	A	['C']	783483	T	['A']
																		1408784	A	['G']							929792	A	['G']	353357	T	['G']	784525	C	['T']
																		1409203	A	['G']							930677	C	['G']	353582	A	['G']	785149	T	['G']
																		1414975	C	['T']							930827	C	['T']	353817	T	['G']	785242	G	['A']
																		1417182	A	['G']							931924	C	['T']	354849	G	['A']	785578	G	['A']
																		1430827	T	['C']							937976	C	['G']	355113	T	['A']	789859	T	['G']
																		1433567	T	['G']							938584	A	['G']	357656	C	['T']	790731	A	['C']
																		1443358	C	['T']							939270	A	['C']	358204	G	['C']	791233	A	['G']
																		1447316	T	['C']							939345	A	['C']	359805	T	['C']	794040	G	['A']
																		1469439	T	['C']							940494	C	['T']	360237	C	['G']	794449	A	['G']
																		1469485	G	['A']							940927	G	['C']	361632	T	['A']	797359	C	['T']
																		1474779	A	['G']							942109	G	['A']	363518	A	['G']	798662	A	['C']
																		1478666	C	['T']							944099	C	['T']	364289	A	['G']	809347	C	['T']
																		1481101	C	['T']							945894	G	['T']	366087	T	['C']	809658	G	['A']
																		1483286	T	['A']							947677	A	['G']	369286	A	['C']	809769	C	['T']
																		1488473	G	['A']							948824	G	['A']	369990	T	['G']	811114	T	['C']
																		1488967	T	['C']							952541	T	['G']	370830	A	['G']	813250	T	['C']
																		1493873	T	['A']							954825	G	['A']	372413	T	['C']	815194	T	['C']
																		1494603	A	['G']							956244	T	['G']	372935	A	['C']	815887	C	['T']
																		1497166	A	['G']							956637	G	['C']	373655	T	['C']	816453	T	['C']
																		1506172	G	['C']							956642	C	['G']	373761	G	['T']	816541	T	['C']
																		1520872	A	['G']							959533	C	['G']	373902	A	['G']	816749	G	['A']
																		1543106	G	['C']							966234	C	['G']	374589	T	['C']	817924	A	['G']
																		1547538	A	['G']							967757	T	['A' 'G']	374751	C	['A']	818868	G	['A']
																		1547759	C	['T']							968661	A	['G']	374769	T	['C']	819528	A	['C']
																		1549209	A	['G']							971090	G	['A']	375333	G	['A']	820266	T	['C']
																		1549766	C	['T']							971343	A	['G']	375590	T	['C']	821227	G	['A']
																		1552315	T	['G']							971817	T	['C']	376723	T	['C']	821848	A	['G']
																		1553185	T	['G']							971914	T	['G']	376937	A	['G']	822749	A	['G']
																		1558878	T	['G']							972274	C	['T']	377385	T	['C']	823357	T	['C']
																		1564524	A	['G']							972492	T	['C']	377446	T	['C']	824766	G	['A']
																		1566622	A	['G']							972592	T	['G']	378191	T	['A']	824772	T	['C']
																		1567581	A	['G']							972826	C	['T']	378354	A	['G']	826361	T	['C']
																		1569608	T	['G']							974011	C	['T']	378421	A	['G']	826537	G	['A']
																		1571167	A	['G']							975343	G	['A']	378811	G	['C']	826934	A	['G']
																		1572342	A	['G']							975544	G	['T']	378880	T	['C']	828264	T	['C']
																		1574470	T	['C']							976120	T	['C']	380163	T	['C']	837923	C	['T']
																		1575030	T	['C']							976466	C	['T']	380246	C	['T']	838579	A	['G']
																		1576462	A	['C']							977936	A	['G']	380468	A	['C']	840079	T	['C']
																		1577085	T	['C']							978398	T	['G']	380641	T	['C']	841038	G	['A']
																		1584102	A	['G']							984405	C	['T']	381243	T	['G']	842724	G	['A']
																		1588954	A	['G']							986267	C	['A']	383235	T	['G']	842748	T	['G']
																		1591509	T	['C']							987420	T	['A']	384130	A	['G']	843037	C	['T']
																		1593981	T	['C']							991150	C	['G']	384384	T	['C']	846300	C	['T']
																		1610742	T	['C']							991373	C	['G']	384704	A	['G']	846335	T	['C']
																		1612541	G	['T']							992182	A	['G' 'T']	384712	T	['C']	846943	T	['C']
																		1613118	G	['C']							992811	A	['G']	385702	A	['G']	849844	G	['A']
																		1613535	G	['A']							994342	A	['G']	385880	A	['G']	852106	T	['C']
																		1613567	A	['T']							995034	C	['T']	386012	T	['G']	855912	C	['T']
																		1614896	C	['T']							998006	G	['A']	386378	A	['G']	856780	T	['C']
																		1614998	A	['G']							999287	G	['A']	386419	T	['C']	859169	C	['T']
																		1615459	A	['G']							1000299	A	['G']	386896	T	['C']	859904	C	['G']
																		1615922	T	['G']							1002166	A	['C']	387015	A	['G']	860729	A	['G']
																		1617278	T	['G']							1002871	C	['T']	390145	A	['G']	861027	T	['C']
																		1620336	C	['T']							1008660	G	['C']	390282	C	['T']	861232	C	['T']
																		1622028	A	['G']							1010523	T	['G']	394900	T	['C']	861607	A	['G']
																		1622947	A	['C']							1014943	A	['G']	395494	T	['C']	861896	C	['T']
																		1626313	G	['A']							1015268	A	['G']	395771	C	['T']	863431	A	['C']
																		1628276	A	['G']							1015911	C	['A']	401828	A	['G']	863691	C	['T']
																		1638477	G	['A']							1017310	C	['T']	404315	T	['C']	871757	A	['G']
																		1649611	A	['G']							1020426	A	['G']	405712	A	['C']	872707	G	['C']
																		1650005	G	['A']							1023478	A	['G']	405763	C	['T']	873008	G	['A']
																		1658112	T	['G']							1025874	C	['T']	407840	T	['C']	878446	T	['C']
																		1659460	A	['G']							1026035	A	['C']	408669	C	['T']	878651	G	['A']
																		1662878	C	['T']							1026308	T	['C']	411595	A	['G']	879900	A	['C']
																		1663398	A	['G']							1027122	C	['T']	411850	T	['C']	881070	G	['T']
																		1667135	T	['G']							1027484	G	['T']	412219	G	['C']	881173	A	['G']
																		1667803	T	['G']							1028972	G	['A']	412298	T	['C']	881667	T	['C']
																		1672221	T	['G']							1033035	C	['G']	412401	T	['C']	882504	C	['T']
																		1676711	A	['C']							1034342	G	['A']	412778	A	['G']	884156	A	['G']
																		1677995	T	['G']							1037032	G	['A']	412989	C	['T']	887879	A	['C']
																		1678777	C	['A']							1037459	G	['C']	413272	T	['C']	888630	A	['G']
																		1679385	A	['G']							1038416	T	['C']	414367	T	['C']	891769	G	['A']
																		1681839	C	['T']							1040225	C	['T']	414569	A	['G']	897777	C	['A']
																		1682081	A	['C']							1041124	G	['A']	414739	G	['A']	905964	A	['G']
																		1685281	T	['C']							1042809	G	['A']	416579	C	['G']	908691	T	['G']
																		1688510	C	['T']							1043209	T	['C']	416856	A	['G']	908855	G	['A']
																		1697638	T	['G']							1043911	G	['C']	416952	A	['G']	909443	A	['G']
																		1700288	T	['G']							1044726	C	['T']	418111	T	['C']	909823	A	['G']
																		1701467	A	['C']							1045301	G	['A']	418332	A	['G']	911778	G	['T']
																		1703585	A	['C']							1047484	G	['C']	419154	A	['G']	914464	T	['C']
																		1704476	T	['G']							1060155	C	['T']	422199	A	['C']	915283	A	['G']
																		1711910	G	['T']							1061750	C	['T']	422367	G	['C']	916186	T	['C']
																		1718174	T	['C']							1065765	G	['A']	422917	G	['A']	916247	C	['T']
																		1718473	G	['A']							1065868	G	['T']	422918	T	['C']	918091	T	['G']
																		1719653	T	['C']							1066342	G	['A']	423624	C	['G']	920593	A	['C']
																		1721397	G	['C']							1068319	C	['T']	423699	T	['C']	920709	A	['G']
																		1722882	A	['C']							1069609	A	['T']	423818	A	['G']	922839	T	['G']
																		1724033	G	['A']							1073958	G	['A']	425415	A	['C']	923319	A	['G']
																		1726246	G	['C']							1077277	G	['A']	425665	C	['G']	924200	C	['T']
																		1726247	C	['G']							1078141	C	['A']	426077	T	['C']	925379	A	['G']
																		1729745	A	['G']							1078843	G	['T']	427259	T	['C']	925716	G	['C']
																		1730705	A	['G']							1079184	T	['C']	432423	T	['G']	930482	G	['A']
																		1730811	G	['A']							1082878	G	['C']	433192	C	['T']	931219	G	['A']
																		1732938	A	['C']							1084614	C	['A']	433514	C	['G']	932081	A	['G']
																		1738161	T	['C']							1084771	G	['C']	433523	T	['C']	932954	T	['C']
																		1739199	T	['C']							1085214	A	['G']	434389	A	['G']	935152	A	['C']
																		1743019	C	['G' 'T']							1091927	T	['G']	436568	T	['C']	937806	A	['C']
																		1743165	C	['T']							1092932	C	['A']	437435	A	['G']	938512	C	['T']
																		1753094	G	['C']							1093537	A	['G']	437540	T	['C']	939045	A	['G']
																		1753860	A	['C']							1094354	A	['C']	437792	G	['C']	940461	C	['T']
																		1754193	G	['T']							1095343	G	['A']	438299	T	['C']	942086	A	['G']
																		1757189	T	['G']							1095492	A	['G']	438931	A	['C']	950849	C	['T']
																		1758248	T	['G']							1096106	C	['T']	439491	A	['G']	950924	T	['C']
																		1758738	C	['G']							1096210	T	['G']	439675	G	['C']	952155	A	['C']
																		1758906	T	['C']							1096629	T	['C']	439912	A	['G']	954052	A	['G']
																		1761365	T	['G']							1099995	T	['C']	440382	A	['G']	954351	G	['A']
																		1761773	C	['T']							1100258	C	['T']	440436	G	['T']	959202	T	['G']
																		1762661	T	['C']							1102011	T	['G']	441300	T	['C']	959280	G	['A']
																		1768508	A	['G']							1102264	G	['C']	443358	A	['G']	966880	A	['G']
																		1769906	T	['C']							1104403	T	['G']	444194	T	['C']	968403	T	['G']
																		1771902	A	['G']							1107390	G	['A']	445820	G	['T']	974351	T	['A', 'C']
																		1773890	T	['G']							1107857	T	['G']	446104	A	['T']	974866	A	['G']
																		1774875	T	['C']							1111006	G	['A']	447079	C	['G']	974973	A	['C']
																		1775508	C	['G']							1111392	G	['A']	448648	T	['C']	976656	A	['G']
																		1778923	A	['G']							1114700	T	['C']	448858	T	['C']	978368	C	['G']
																		1781667	A	['C']							1117456	C	['G']	449026	T	['C']	980070	A	['G']
																		1781904	T	['C']							1118473	A	['G']	449549	A	['G']	983812	G	['T']
																		1783533	T	['C']							1118850	A	['G']	452380	C	['T']	985065	A	['G']
																		1786667	A	['C']							1119163	C	['G']	452864	C	['T']	985457	T	['C']
																		1787941	G	['A']							1119268	C	['T']	453542	C	['T']	987784	A	['C']
																		1789398	A	['C']							1123684	G	['C']	453816	A	['G']	988103	T	['C']
																		1790655	A	['C']							1125935	G	['C']	453873	T	['G']	992206	T	['C']
																		1791810	A	['C']							1126447	C	['T']	454509	T	['G']	994004	A	['G']
																		1793967	T	['C']							1127505	G	['C']	455034	G	['A']	997841	C	['G']
																		1797997	T	['C']							1128578	G	['A']	455203	A	['G']	1000455	C	['T']
																		1803559	C	['T']							1128640	G	['A']	456527	A	['G']	1003986	A	['G']
																		1806243	T	['C']							1130660	T	['C']	456954	A	['C']	1004270	A	['G']
																		1814176	G	['A']							1131498	G	['T']	457209	T	['G']	1005580	T	['G']
																		1819096	A	['C' 'T']							1132343	G	['C']	457513	C	['T']	1005826	T	['C']
																		1834493	A	['C']							1132375	T	['C']	457619	G	['A']	1009396	G	['A']
																		1836054	T	['C']							1140105	C	['T']	460398	C	['T']	1011573	A	['G']
																		1845639	T	['C']							1142245	C	['T']	461313	A	['G']	1013049	T	['C']
																		1846305	T	['G']							1142327	C	['T']	463013	A	['G']	1015124	A	['C']
																		1846742	A	['G']							1142351	C	['T']	463028	T	['C']	1015502	G	['A']
																		1847146	T	['G']							1144884	G	['A']	463781	T	['C']	1016876	A	['G']
																		1851256	C	['T']							1145996	C	['T']	467221	C	['G']	1017406	A	['C']
																		1854055	C	['T']							1166094	C	['T']	467792	T	['C']	1019363	A	['G']
																		1856182	T	['C']							1169214	G	['T']	469279	T	['C']	1019979	C	['T']
																		1856705	A	['C']							1169668	T	['G']	471112	T	['C']	1020414	G	['A']
																		1867849	A	['C']							1174865	T	['C']	471774	C	['G']	1023749	T	['G']
																		1868104	C	['T']							1176642	C	['T']	471863	G	['T', 'C']	1030057	G	['A']
																		1870929	T	['C']							1177148	G	['A']	472044	A	['G']	1033706	G	['A']
																		1872406	C	['A']							1177220	G	['A']	472411	A	['G']	1037147	C	['T']
																		1879192	T	['C']							1178344	A	['G']	474467	T	['C']	1038711	A	['G']
																		1883240	A	['C']							1182250	G	['C']	477722	T	['C']	1039269	C	['T']
																		1883708	G	['C']							1185685	C	['T']	477833	A	['G']	1039462	A	['C']
																		1886086	T	['G']							1185760	C	['T']	478197	C	['T']	1039927	T	['C']
																		1890404	A	['G']							1187638	T	['A']	478208	A	['G']	1041420	A	['C']
																		1891076	A	['G']							1192701	C	['T']	478629	T	['G']	1041862	A	['G']
																		1895273	A	['C']							1193699	A	['G']	479355	A	['G']	1043866	G	['A']
																		1898290	G	['C']							1195620	G	['A']	479417	T	['A']	1043981	T	['C']
																		1901954	G	['A']							1196099	G	['A']	480316	T	['C']	1044514	G	['A']
																		1911481	G	['A']							1196410	T	['G']	480782	C	['T']	1046367	A	['C']
																		1912499	A	['G']							1201716	C	['T']	481006	T	['A']	1059117	G	['A']
																		1913208	A	['G']							1203065	G	['A']	481184	T	['G']	1059487	A	['C']
																		1916485	T	['C']							1203946	T	['G']	483949	T	['C']	1060352	C	['A']
																		1918575	G	['T']							1205170	A	['T']	484833	T	['C']	1062447	A	['G']
																		1925351	C	['T']							1205677	C	['A']	485189	A	['G']	1064232	A	['G']
																		1927653	A	['C']							1208850	G	['A']	485524	T	['A']	1064703	A	['G']
																		1936006	T	['G']							1209493	T	['G']	485645	G	['C']	1064758	C	['T']
																		1937350	G	['A']							1210188	G	['A']	485814	T	['C']	1067561	C	['T']
																		1940873	T	['C']							1212172	G	['C']	487223	T	['C']	1067780	T	['C']
																		1941983	G	['C']							1212408	A	['G']	490327	A	['C']	1068349	C	['T']
																		1943290	C	['A']							1216896	G	['A']	490754	T	['C']	1068608	T	['C']
																		1945479	A	['G']							1217243	G	['C']	490837	A	['G']	1068756	A	['C']
																		1947802	T	['G']							1227043	C	['G']	491777	G	['A']	1068773	A	['C']
																		1949447	A	['G']							1229430	G	['A']	492617	A	['G']	1068907	A	['G']
																		1949681	T	['G']							1229750	G	['A']	492961	G	['C']	1069601	T	['C']
																		1949717	A	['G']							1230045	C	['T']	493126	C	['T']	1072054	A	['C']
																		1950481	T	['C']							1230917	A	['G']	493325	A	['G']	1074418	A	['G']
																		1951824	A	['G']							1235789	T	['C']	493935	A	['G']	1075472	A	['G']
																		1952213	G	['A']							1239302	G	['C']	494940	A	['G']	1080755	T	['C']
																		1953311	G	['A']							1239542	G	['A']	495149	A	['G']	1081516	C	['G']
																		1956707	A	['C']							1241332	C	['T']	495167	T	['C']	1083158	A	['G']
																		1956796	T	['C']							1241661	G	['T']	495968	T	['C']	1083876	G	['A']
																		1958255	A	['C']							1242020	C	['T']	496018	G	['A']	1084143	A	['G']
																		1960140	T	['C']							1243198	A	['G']	496139	A	['G']	1084199	C	['T']
																		1960512	A	['C']							1249072	C	['T']	496291	G	['A']	1084483	T	['G']
																		1960722	G	['A']							1249415	C	['G']	497150	A	['G']	1088935	A	['T']
																		1962271	A	['T']							1249536	C	['T']	497207	C	['T']	1090150	G	['A']
																		1962830	T	['C']							1250619	A	['G']	497581	T	['G']	1094050	A	['C']
																		1965494	C	['T']							1252785	A	['T']	497587	T	['C']	1095861	T	['C']
																		1967248	T	['C']							1252802	C	['T']	497933	A	['G']	1095900	T	['C']
																		1967401	A	['T']							1252897	G	['A']	499670	T	['C']	1097034	T	['C']
																		1970298	G	['C']							1255444	C	['T']	499731	G	['A']	1098996	T	['C']
																		1970686	T	['C']							1256122	C	['T']	500142	G	['A']	1099209	A	['T']
																		1977924	G	['C']							1256206	C	['T']	501138	A	['G']	1100309	G	['C']
																		1978041	C	['T']							1256370	A	['T']	501885	C	['T']	1105206	A	['C']
																		1981499	A	['C']							1256577	A	['G']	504787	A	['G']	1105458	A	['G']
																		1981743	T	['G']							1258761	A	['G']	505032	A	['G']	1108152	A	['G']
																		1983010	G	['A']							1265004	C	['T']	505325	C	['T']	1108490	T	['C']
																		1983069	A	['G']							1265311	T	['C']	505679	G	['A']	1108669	A	['G']
																		1984507	C	['T']							1267589	C	['T']	506475	T	['C']	1108772	C	['A']
																		1987721	A	['G']							1268344	T	['A']	507443	G	['C']	1108777	C	['T']
																		1990814	C	['A']							1273340	C	['T']	510077	T	['C']	1109569	G	['A']
																		1993896	G	['T']							1273487	C	['T']	515286	A	['G']	1110604	T	['G']
																											1275116	A	['G']	515297	T	['C']	1112481	C	['T']
																											1276375	T	['C']	516168	T	['C']	1113456	C	['G']
																											1276662	T	['C']	518486	G	['A']	1114104	T	['C']
																											1278473	T	['C']	518594	T	['C']	1114581	T	['G']
																											1279579	C	['G']	519179	A	['G']	1114770	T	['C']
																											1281422	C	['T']	521464	C	['T', 'G']	1115382	G	['A']
																											1285882	A	['C']	521605	A	['C']	1119199	C	['T']
																											1286893	G	['A']	522492	T	['C']	1119340	T	['C']
																											1286959	T	['C']	522748	T	['C']	1119556	A	['C']
																											1287969	C	['G']	522835	T	['C']	1119589	A	['C']
																											1287980	G	['A']	523126	A	['G']	1121130	C	['G']
																											1290138	G	['A']	525070	A	['G']	1124984	A	['G']
																											1292718	C	['T']	525131	A	['T']	1125143	G	['A']
																											1293859	A	['G']	525160	T	['G']	1125258	T	['C']
																											1294866	G	['A']	526502	T	['C']	1126146	A	['G']
																											1295600	G	['A']	526789	T	['C']	1126914	C	['T']
																											1298534	G	['A']	526840	T	['C']	1127116	A	['G']
																											1304728	A	['G']	528619	A	['G']	1127359	C	['T']
																											1306910	G	['A']	529762	A	['G']	1128306	T	['C']
																											1307922	T	['A']	532267	C	['T']	1128682	T	['C']
																											1308544	C	['T']	532492	A	['G']	1130436	A	['G']
																											1314724	A	['G']	532507	T	['C']	1130448	A	['G']
																											1318984	G	['A']	535302	T	['G']	1130462	T	['C']
																											1320389	G	['A']	535317	A	['T']	1130544	A	['C']
																											1321950	C	['G']	535963	A	['G']	1132340	G	['C']
																											1322527	G	['A']	537622	A	['G']	1132822	T	['C']
																											1323331	C	['G']	539759	C	['G']	1138975	G	['A']
																											1325905	C	['G']	540061	C	['G']	1139310	C	['T']
																											1329923	C	['G']	540528	T	['G']	1139830	A	['G']
																											1331101	C	['T']	541820	T	['C']	1142309	G	['A']
																											1331640	G	['C']	542160	T	['G']	1142402	T	['A']
																											1331709	A	['T']	542323	T	['C']	1144084	A	['C']
																											1334325	G	['C']	542656	G	['A']	1145541	A	['G']
																											1335449	T	['G']	542865	A	['G']	1145734	T	['C']
																											1346189	T	['G']	543100	T	['G']	1146165	C	['T']
																											1349079	T	['C']	543715	T	['A']	1147207	A	['G']
																											1352747	A	['C']	544058	T	['G']	1147250	G	['A']
																											1354720	T	['A']	544188	G	['A']	1149412	T	['G']
																											1356628	C	['G']	544294	T	['A']	1151259	A	['G']
																											1356921	C	['T']	544685	G	['A']	1151260	G	['A']
																											1357642	C	['T']	547709	T	['C']	1168855	C	['T']
																											1362409	G	['A']	550905	T	['A']	1171361	C	['T']
																											1364363	T	['C']	550914	A	['G']	1176016	G	['A']
																											1365580	G	['A']	551093	T	['C']	1177070	A	['G']
																											1365738	C	['A']	551554	A	['T']	1177106	G	['A']
																											1365802	G	['T']	551664	T	['C']	1178012	G	['C']
																											1370294	T	['A']	551982	A	['G']	1182052	G	['A']
																											1370812	C	['G']	552602	T	['C']	1182895	T	['C']
																											1373058	C	['T' 'G']	553485	T	['C']	1187625	A	['G']
																											1373258	G	['A']	554596	G	['C']	1192353	T	['C']
																											1375044	A	['C']	555592	A	['G']	1193049	A	['G']
																											1377641	T	['C']	555991	A	['G']	1193264	A	['G']
																											1381241	G	['A']	567018	A	['G']	1193296	G	['A']
																											1384838	T	['C']	567336	G	['C']	1194440	A	['G']
																											1387770	G	['A']	567927	T	['C']	1204350	G	['A']
																											1389565	G	['A']	568257	A	['G']	1204351	T	['C']
																											1391035	C	['T']	569174	G	['A']	1209002	C	['T']
																											1391562	G	['C']	569203	G	['A']	1210434	T	['C']
																											1392061	A	['C']	569323	C	['G']	1213733	A	['C']
																											1392150	A	['G']	569450	T	['G']	1214202	A	['G']
																											1392865	G	['A']	570302	T	['G']	1214500	A	['G']
																											1394406	G	['A']	570631	A	['C']	1217004	A	['G']
																											1395313	G	['A']	570984	G	['A']	1219613	T	['C']
																											1396324	G	['C']	571996	G	['A']	1225056	A	['C']
																											1398316	C	['T']	573071	T	['C']	1226442	G	['A']
																											1398889	A	['G']	574580	A	['G']	1226701	A	['T']
																											1400159	C	['T']	574587	G	['A']	1227081	C	['T']
																											1403505	T	['C']	574588	A	['G']	1230033	G	['C']
																											1403537	C	['T']	575410	G	['A']	1230329	C	['G']
																											1403791	G	['A']	576358	C	['T']	1230987	T	['G']
																											1405205	C	['T']	577069	A	['G']	1233770	C	['T']
																											1408065	G	['C']	577406	T	['C']	1237999	T	['C']
																											1411519	A	['G']	578099	G	['A']	1241222	A	['G']
																											1412341	A	['G']	578352	G	['A']	1242529	A	['C']
																											1413656	T	['C']	579457	C	['G']	1244810	C	['T']
																											1416631	A	['G']	580871	C	['A']	1248800	T	['C']
																											1416654	C	['T']	580938	G	['A']	1252241	G	['A']
																											1416801	A	['G']	581227	T	['C']	1253081	A	['G']
																											1416957	C	['A']	582879	A	['G']	1253243	G	['A']
																											1424516	C	['A']	583196	T	['C']	1253643	A	['G']
																											1425419	G	['A']	583300	G	['A']	1258262	G	['T']
																											1425499	G	['A']	583824	T	['C']	1258384	A	['G']
																											1425590	C	['T']	584148	A	['C']	1261017	G	['A']
																											1428305	G	['A']	584246	T	['G']	1265320	C	['T']
																											1428637	A	['G']	584385	G	['C']	1265961	C	['T']
																											1429194	C	['G']	585083	G	['A']	1266651	A	['G']
																											1433372	G	['A']	585846	A	['T', 'G']	1269524	T	['C']
																											1433530	G	['C']	586971	T	['C']	1270196	C	['T']
																											1434280	C	['T']	587460	T	['C']	1274160	C	['T']
																											1436679	A	['G']	588107	A	['G']	1274522	A	['G']
																											1439078	C	['T']	588425	G	['A']	1275251	C	['G']
																											1441613	C	['G']	590320	T	['C']	1278042	G	['A']
																											1444123	T	['G']	591600	T	['G']	1278091	G	['C']
																											1446225	T	['G']	592330	A	['G']	1278632	A	['G']
																											1447929	T	['C']	592820	T	['C']	1279419	T	['C']
																											1449070	G	['A']	593567	T	['G']	1280578	G	['T']
																											1450072	T	['C']	595351	A	['G']	1280618	G	['A']
																											1454320	C	['T']	596600	A	['G']	1280640	T	['A']
																											1456200	G	['C']	597270	A	['G']	1281274	T	['C']
																											1459490	T	['G']	597335	A	['G']	1281941	C	['T']
																											1462477	C	['T']	597527	T	['C']	1284928	A	['G']
																											1464296	C	['T']	598460	T	['G']	1286819	A	['G']
																											1464376	C	['T']	598805	C	['G']	1287612	G	['A']
																											1465740	T	['C']	598889	T	['G']	1288376	T	['C']
																											1466658	C	['T']	599249	T	['C']	1288829	A	['C']
																											1467227	A	['G']	599794	G	['A']	1290337	T	['C']
																											1468533	T	['G']	601308	A	['G']	1293746	T	['C']
																											1469436	C	['T']	601616	T	['C']	1294739	A	['G']
																											1471048	G	['A']	602060	A	['G']	1298858	C	['T']
																											1471643	G	['A']	602178	T	['G']	1299344	T	['C']
																											1475345	C	['T']	603736	T	['C']	1300067	G	['C']
																											1480038	G	['A']	607483	A	['C']	1300363	T	['G']
																											1480935	G	['C']	609897	C	['T']	1301206	T	['G']
																											1481143	T	['C']	613690	T	['C']	1302793	A	['G']
																											1483450	C	['T']	613697	T	['C']	1303464	A	['G']
																											1483873	A	['G']	613827	T	['C']	1304369	T	['C']
																											1485044	A	['C']	666260	T	['C']	1305016	T	['C']
																											1488128	G	['A']	668827	A	['G']	1306762	T	['G']
																											1490831	C	['G']	669097	C	['T']	1306868	A	['C']
																											1498564	G	['A']	669267	A	['G']	1312151	T	['C']
																											1505469	T	['G']	671016	A	['G']	1313861	A	['G']
																											1506936	C	['G']	673356	T	['C']	1314578	A	['G']
																											1508689	C	['A']	673886	A	['G']	1315918	A	['G']
																											1511293	A	['G']	674284	A	['G']	1316807	T	['C']
																											1514456	C	['G']	674891	T	['C']	1318567	C	['T']
																											1516962	G	['C']	675098	G	['A']	1321236	T	['C']
																											1517226	C	['T']	676084	T	['C']	1324353	A	['C']
																											1517423	G	['C']	677655	A	['G']	1327110	T	['C']
																											1517794	G	['A']	678569	A	['G']	1327818	A	['G']
																											1518764	G	['A']	678689	A	['G']	1328971	T	['G']
																											1521968	G	['C']	678691	A	['G']	1329176	C	['T']
																											1524049	T	['G']	679047	G	['A']	1331420	G	['A']
																											1527055	T	['C']	679495	A	['G']	1331421	A	['G']
																											1528427	T	['G']	679805	G	['A']	1332129	C	['T', 'G']
																											1536446	C	['T']	680318	T	['C']	1332269	G	['T']
																											1540601	G	['A']	680975	T	['C']	1333712	T	['C']
																											1541370	T	['G']	682148	A	['G']	1339443	A	['G']
																											1541371	G	['A']	682482	G	['A']	1344106	G	['C']
																											1546594	T	['C']	683118	G	['C']	1344133	G	['A']
																											1547171	A	['C']	684884	T	['C']	1347759	C	['T']
																											1550375	C	['T']	685094	G	['A']	1347789	C	['T']
																											1552033	T	['C']	686800	G	['C']	1349029	T	['C']
																											1561253	C	['G' 'T']	687452	A	['G']	1349214	C	['T']
																											1563741	A	['C']	691332	T	['C']	1350413	A	['C']
																											1567828	G	['A']	692720	T	['C']	1357471	T	['C']
																											1568097	A	['G']	694860	A	['C']	1361501	T	['C']
																											1568833	G	['A']	695869	T	['C']	1361718	C	['T']
																											1571346	C	['T']	695930	A	['G']	1363182	C	['T']
																											1574936	A	['G']	696131	T	['G']	1363286	T	['C']
																											1576906	G	['A']	696189	T	['C']	1363518	A	['C']
																											1577455	T	['C']	696534	T	['C']	1363807	A	['T']
																											1583467	G	['C']	696598	T	['C']	1364823	A	['G']
																											1584474	G	['A']	696970	A	['G']	1367121	G	['C']
																											1584543	C	['G']	697078	A	['G']	1368837	T	['C']
																											1587091	A	['G']	697458	A	['G']	1369733	C	['T']
																											1587543	C	['T']	697564	A	['G']	1372921	C	['T']
																											1589255	G	['A']	698089	T	['C']	1374871	G	['A']
																											1590436	C	['T']	699746	T	['C']	1376419	T	['G']
																											1591622	G	['A']	699901	G	['T']	1377053	T	['G']
																											1596761	T	['C']	700872	A	['G']	1379067	A	['C']
																											1605457	C	['T']	700876	C	['T']	1380257	C	['G']
																											1607868	C	['T']	701466	T	['C']	1381823	C	['T']
																											1609789	G	['A']	701586	A	['G']	1382619	A	['T']
																											1612965	T	['G']	702602	A	['C']	1383718	T	['C']
																											1613300	C	['T']	702901	T	['C']	1384628	A	['G']
																											1614646	A	['G']	703131	A	['C']	1384703	A	['G']
																											1614895	A	['T']	703362	A	['C']	1386761	C	['G']
																											1617071	G	['A']	703723	G	['A']	1387361	T	['G']
																											1617873	C	['T']	704781	G	['A']	1387556	C	['T']
																											1618246	C	['T' 'G']	705319	A	['T']	1388056	G	['A']
																											1618702	A	['G']	706052	A	['G']	1388174	A	['C']
																											1620547	G	['A']	708644	T	['C']	1388736	C	['A']
																											1623522	G	['A']	708872	A	['G']	1390027	G	['A']
																											1624424	T	['G']	710166	C	['T']	1399248	T	['C']
																											1626015	G	['T']	710643	G	['C']	1400515	A	['G']
																											1626588	A	['T']	711477	T	['C']	1401748	A	['G']
																											1629187	A	['C']	713854	T	['G']	1401791	T	['C']
																											1631604	T	['C']	715019	A	['G']	1405042	A	['G']
																											1632942	T	['G']	715159	C	['G']	1406200	C	['T']
																											1636216	A	['G']	718121	T	['C']	1406336	T	['C']
																											1639704	C	['T']	723100	A	['G']	1408381	T	['C']
																											1640706	G	['A']	724413	C	['T']	1408637	T	['C']
																											1641030	G	['A']	724525	A	['C']	1409112	G	['A']
																											1647907	C	['T']	724960	A	['G']	1409689	T	['C']
																											1648394	C	['T']	725396	T	['C']	1411626	A	['G']
																											1651220	G	['A']	725855	A	['G']	1413014	C	['T']
																											1657445	C	['T']	725874	A	['G']	1413603	A	['C']
																											1657546	G	['A']	726197	A	['G']	1414618	A	['G']
																											1659010	C	['T']	727190	T	['C']	1414693	C	['T']
																											1660713	A	['G']	727223	T	['C']	1417834	C	['T']
																											1667008	G	['C']	727896	C	['T']	1420180	G	['T']
																											1668031	C	['T']	727994	C	['G']	1422583	T	['C', 'G']
																											1668328	C	['G']	728182	A	['G']	1423147	C	['T']
																											1669851	A	['C']	729169	A	['G']	1430098	A	['G']
																											1669930	G	['A']	729879	A	['G']	1430452	G	['A']
																											1674926	T	['C']	731142	A	['C']	1433578	T	['C']
																											1680749	G	['A']	731797	G	['A']	1433647	C	['T']
																											1681957	A	['G']	733819	A	['G']	1434026	C	['G']
																											1682945	G	['A']	733934	T	['C']	1434616	T	['C']
																											1683625	T	['G']	734108	C	['T']	1434846	G	['C']
																											1698789	G	['A']	734574	A	['G']	1435083	C	['A']
																											1700287	T	['G']	734580	T	['G']	1437352	T	['G']
																											1700850	T	['A']	735651	T	['G']	1437423	G	['A']
																											1707798	C	['T']	736239	A	['G']	1439315	C	['G']
																											1713510	C	['T']	736331	A	['C']	1440997	C	['T']
																											1721170	C	['T']	736625	T	['C']	1441516	G	['A']
																											1723289	T	['C']	737383	C	['T']	1442423	T	['G']
																											1725925	T	['G']	743813	T	['C']	1443256	G	['A']
																											1726368	C	['T']	743893	A	['G']	1443335	A	['C']
																											1728516	C	['T']	744218	A	['C']	1446519	G	['A']
																											1731877	C	['T']	745926	A	['G']	1446697	A	['C']
																											1738744	A	['G']	746028	A	['G']	1447135	A	['G']
																											1741634	C	['T']	747789	G	['A']	1448735	G	['A']
																											1742042	G	['A']	747892	G	['A']	1451803	A	['G']
																											1745373	G	['A']	748331	C	['G']	1451817	A	['G']
																											1746221	C	['T']	748337	G	['A']	1454407	A	['C']
																											1749259	G	['A']	748503	G	['C']	1455097	T	['C']
																											1749753	G	['A']	749433	A	['G']	1456428	T	['C']
																											1749834	C	['T']	750095	A	['G']	1456879	A	['C']
																											1750001	G	['A']	751481	A	['G']	1456953	A	['G']
																											1750038	C	['T']	752420	A	['G']	1458918	A	['G']
																											1750318	C	['A']	752851	C	['T']	1460335	C	['T']
																											1750655	A	['C']	753022	T	['C']	1460806	G	['A']
																											1751704	C	['T']	753957	G	['A']	1461958	A	['G']
																											1753311	C	['T']	756554	A	['G']	1464212	G	['A']
																											1754145	G	['C']	756856	T	['C']	1464521	T	['C']
																											1754904	G	['A']	758606	A	['G']	1464694	A	['G']
																											1757060	G	['A']	758948	A	['G']	1468504	T	['C']
																											1757174	G	['T']	760630	A	['C']	1469083	A	['G']
																											1757263	A	['C']	760771	C	['G']	1471712	A	['C']
																											1759074	C	['T']	761118	G	['T']	1472099	G	['A']
																											1759947	G	['A']	761440	T	['C']	1473102	T	['C']
																											1766949	T	['C']	761689	A	['G']	1477057	A	['G']
																											1767421	C	['T']	762323	A	['G']	1477663	G	['A']
																											1771530	C	['G']	762541	T	['C']	1477943	T	['C']
																											1771899	G	['A']	763317	T	['G']	1478240	G	['A']
																											1772121	G	['A']	763534	T	['C']	1484537	A	['G']
																											1772498	G	['T']	763837	G	['A']	1484963	T	['C']
																											1780249	A	['C']	764259	A	['G']	1486409	A	['G']
																											1781554	G	['A']	764659	T	['G']	1486942	C	['T']
																											1782127	A	['T']	764783	G	['C']	1487322	G	['A']
																											1782719	G	['C']	765494	A	['G']	1487904	G	['A']
																											1783817	G	['C']	765496	T	['G']	1489331	A	['G']
																											1783972	T	['C']	765643	C	['A']	1495423	C	['T']
																											1784655	T	['C']	765684	T	['C']	1499774	G	['A']
																											1787070	G	['A']	765886	A	['T']	1503767	G	['A']
																											1787314	C	['T']	766044	A	['G']	1505486	G	['A']
																											1789068	A	['C']	766227	A	['C']	1505786	C	['T']
																											1790583	A	['G']	766963	C	['T']	1508856	A	['G']
																											1790678	C	['T']	768422	A	['C']	1508965	T	['C']
																											1791247	A	['G']	768855	T	['C']	1510032	A	['C']
																											1798120	G	['T']	769057	A	['G']	1512712	T	['G']
																											1799519	G	['T']	769122	T	['C']	1513663	T	['C']
																											1802373	G	['T']	769133	G	['A']	1513879	A	['G']
																											1802715	G	['A']	769162	A	['C']	1515440	T	['C']
																											1803369	C	['G']	769339	A	['C']	1515725	A	['G']
																											1805195	G	['A']	769577	T	['C']	1517531	G	['A']
																											1805319	C	['T']	769681	T	['C']	1518164	A	['G']
																											1805951	C	['T']	769855	T	['G']	1521602	T	['C']
																											1806325	G	['A']	769904	A	['G']	1521666	A	['G']
																											1809460	G	['A']	769952	T	['C']	1524445	T	['C']
																											1811978	T	['G']	770329	A	['G']	1525027	C	['T']
																											1814580	G	['A']	770617	G	['A']	1525851	T	['A']
																											1816439	G	['A']	770713	A	['C']	1526240	C	['T']
																											1816635	G	['A']	770715	A	['G']	1527579	T	['C']
																											1817418	C	['T']	770772	T	['G']	1530692	T	['C']
																											1817564	T	['G']	771279	A	['C']	1531445	G	['A']
																											1832022	G	['A']	771399	T	['C']	1532275	G	['A']
																											1834957	A	['G']	771528	G	['A']	1532421	T	['C']
																											1835076	G	['A']	771537	A	['G']	1534366	T	['C']
																											1836531	T	['A']	772645	G	['C']	1535303	G	['A']
																											1836615	A	['C']	772647	T	['C']	1536974	T	['C']
																											1837001	G	['A']	773441	T	['C']	1538948	G	['A']
																											1845837	A	['C']	775263	A	['G']	1539062	A	['G']
																											1847155	A	['C']	775870	A	['G']	1539095	T	['C']
																											1850324	C	['T']	776795	T	['G']	1539467	G	['T']
																											1853429	G	['C']	779561	T	['C']	1540136	G	['A']
																											1855327	G	['A']	780018	A	['C']	1544624	T	['C']
																											1856411	A	['G' 'T']	780128	A	['G']	1545233	T	['A']
																											1856812	G	['A']	780329	A	['C']	1546416	T	['G']
																											1857473	G	['A']	782598	C	['T']	1546673	T	['C']
																											1859269	G	['A']	782798	A	['C']	1550184	G	['A']
																											1859604	G	['A']	785942	C	['T']	1550666	A	['G']
																											1861131	G	['A']	786083	A	['G']	1552358	C	['T']
																											1861484	G	['A']	786146	T	['C']	1561650	A	['G']
																											1862292	T	['C']	786372	T	['C']	1563583	G	['T']
																											1868915	C	['A']	786819	A	['C']	1565956	A	['G']
																											1872334	C	['G']	787495	T	['C']	1567347	A	['G']
																											1877992	G	['A']	788121	A	['G']	1567737	A	['G']
																											1880132	A	['G']	788375	T	['C']	1568672	C	['T']
																											1883119	A	['G']	788729	C	['T']	1574566	A	['C']
																											1883349	A	['G']	790017	A	['G']	1576492	C	['T']
																											1883976	G	['T']	790024	T	['C']	1578327	T	['C']
																											1885928	C	['G']	793237	A	['G']	1579250	C	['T']
																											1886767	T	['A']	793793	A	['G']	1579880	T	['G']
																											1887708	G	['A']	793920	T	['C']	1582285	A	['C']
																											1888080	T	['C']	794030	A	['T']	1582287	T	['G']
																											1888088	A	['C']	794188	A	['G']	1586640	C	['T']
																											1888237	G	['A']	794395	T	['C']	1587523	C	['T']
																											1888239	A	['C']	794636	A	['G']	1587569	G	['A']
																											1888688	G	['T']	796555	T	['A']	1587914	G	['A']
																											1889030	G	['T']	796874	T	['C']	1587933	A	['G']
																											1894373	T	['C']	796989	A	['G']	1590841	C	['T', 'A']
																											1895849	C	['T']	797281	A	['C']	1595595	C	['T']
																											1896479	T	['C']	797612	T	['G']	1596749	T	['C']
																											1901057	T	['A']	797734	A	['G']	1597203	T	['C']
																											1902240	A	['C']	798422	C	['G']	1597682	A	['C']
																											1902366	G	['A']	806305	T	['C']	1597977	A	['C']
																											1904721	T	['C']	806473	A	['G']	1599249	T	['G']
																											1905103	C	['T']	807637	G	['C']	1605204	C	['G']
																											1907118	T	['C']	809629	C	['T']	1606737	A	['G']
																											1908623	C	['T']	810711	C	['G']	1608674	T	['C']
																											1908842	G	['A']	810712	T	['C']	1609199	T	['C']
																											1909963	T	['C']	811569	A	['G']	1610647	C	['T']
																											1912778	C	['T']	812144	T	['G']	1611004	A	['G']
																											1916953	G	['A']	813261	A	['G']	1611237	G	['A']
																											1921228	G	['A']	813735	T	['C']	1611577	A	['G']
																											1923246	C	['T']	816933	C	['T']	1615427	A	['G']
																											1923316	A	['C']	817228	A	['G']	1618389	T	['C']
																											1924091	C	['G']	817329	C	['T']	1618923	G	['A']
																											1924222	C	['A']	817481	A	['G']	1619145	T	['G']
																											1927749	G	['A']	817493	C	['T']	1621839	A	['C']
																											1929080	C	['T']	817497	T	['G']	1622748	G	['A']
																											1929134	G	['T']	817682	A	['G']	1631607	G	['C']
																											1935729	A	['G']	817977	T	['G']	1632414	A	['G']
																											1938146	T	['C']	818069	C	['T']	1637601	A	['G']
																											1938904	C	['T']	818071	A	['G']	1638087	T	['C']
																											1939480	G	['A']	818593	T	['A']	1639212	C	['T']
																											1941428	A	['G']	818594	A	['T']	1639436	T	['G']
																											1942644	G	['T']	819927	A	['G']	1649971	C	['A']
																											1942687	T	['C']	822724	C	['A']	1650169	G	['A']
																											1944457	T	['C']	823113	A	['G']	1650243	A	['C']
																											1944682	T	['A']	823340	A	['G']	1654563	G	['A']
																											1944844	T	['C']	823590	A	['G']	1655286	C	['A']
																											1945723	C	['T']	823667	T	['G']	1655601	A	['C']
																											1946165	G	['C']	824022	A	['C']	1658511	A	['C']
																											1950807	A	['C']	824638	A	['C']	1658601	T	['C']
																											1952143	G	['A']	826149	T	['G']	1666707	T	['C']
																											1952363	T	['C']	826190	C	['T']	1666992	A	['C']
																											1952495	T	['G']	827806	C	['T']	1668860	A	['C']
																											1953003	A	['T']	828799	T	['G']	1671228	C	['T']
																											1954173	G	['A']	828860	A	['C']	1674273	T	['G']
																											1954315	T	['A']	829184	T	['G']	1675019	C	['T']
																											1954788	A	['C']	829896	A	['C']	1678342	C	['T']
																											1955385	C	['T']	834351	A	['C']	1678722	C	['T']
																											1958510	A	['C']	834878	T	['C']	1680237	C	['T']
																											1958729	G	['A']	836340	A	['G']	1682321	G	['A']
																											1963472	T	['C']	836409	A	['G']	1683061	T	['C']
																											1967765	C	['A']	837600	A	['T']	1683145	A	['C']
																											1967777	G	['A']	837899	A	['G']	1683627	A	['G']
																											1968114	A	['G']	837928	A	['G']	1683829	T	['A']
																											1969880	A	['G']	838156	T	['C']	1686509	A	['C']
																											1971348	C	['T']	839157	T	['G']	1688212	C	['T']
																											1973443	T	['G']	839593	C	['G']	1688369	C	['T']
																											1974348	C	['T']	840140	T	['C']	1688846	C	['T']
																											1974710	T	['G']	840532	G	['C']	1697158	T	['G']
																											1974856	A	['G']	840766	A	['G']	1697963	A	['G']
																											1981116	G	['A']	841345	T	['C']	1701611	G	['T']
																											1981333	G	['C']	841608	C	['T']	1702538	A	['G']
																											1983843	T	['C']	842116	A	['G']	1702679	A	['C']
																											1984457	A	['C']	842145	T	['C']	1703731	A	['G']
																											1988626	G	['A']	842218	A	['G']	1712959	A	['G']
																											1988756	C	['T']	842556	T	['C']	1714385	G	['A']
																											1990341	G	['T']	842717	C	['G']	1715070	A	['G']
																											1993095	C	['T']	843031	C	['T']	1719022	A	['G']
																											1993409	G	['C']	843704	T	['C']	1719433	A	['G']
																											1993415	G	['A']	843917	T	['C']	1721283	A	['G']
																											1993648	G	['A']	844391	G	['A']	1722119	T	['C']
																											1993929	T	['C']	844740	A	['G']	1723535	A	['G']
																														845228	T	['C']	1726178	A	['C']
																														845458	T	['C']	1726290	T	['G']
																														845991	A	['G']	1727132	C	['T']
																														846546	T	['C']	1728125	A	['C']
																														848569	T	['C']	1731241	C	['A']
																														848580	T	['C', 'G']	1731865	C	['T']
																														848610	T	['C']	1737990	C	['T']
																														850668	A	['G']	1739231	C	['T']
																														850911	T	['A', 'G']	1743791	T	['C']
																														851118	A	['G']	1749538	G	['A']
																														851191	T	['C']	1750117	T	['G']
																														851285	T	['C']	1751092	T	['G']
																														851503	T	['C']	1752022	C	['T']
																														851591	C	['A']	1752199	A	['G']
																														851814	A	['G']	1758072	C	['G']
																														851862	T	['C']	1758553	C	['T']
																														855401	A	['G']	1759144	G	['A']
																														856120	A	['C']	1761220	T	['C']
																														856424	T	['C']	1765191	T	['C']
																														857024	T	['C']	1767898	T	['G']
																														858280	A	['G']	1772506	T	['G']
																														858775	T	['C']	1773207	T	['C']
																														858810	A	['G']	1774262	T	['C']
																														859046	T	['G']	1774677	A	['G']
																														859727	A	['G']	1777200	T	['G']
																														860232	C	['G']	1780449	C	['T']
																														860928	T	['C']	1780755	T	['A']
																														861383	T	['C']	1781122	G	['A']
																														861873	T	['C']	1781506	C	['T']
																														862753	T	['G']	1782712	T	['G']
																														862835	C	['T']	1782758	G	['A']
																														863024	A	['C']	1784777	A	['C']
																														863405	C	['T']	1785161	C	['G']
																														863560	C	['T']	1791031	A	['G']
																														864038	T	['C']	1793825	T	['C']
																														864335	A	['G']	1799076	C	['T']
																														864429	C	['T']	1801333	A	['G']
																														864489	T	['C']	1802030	A	['G']
																														871015	A	['G']	1804082	T	['C']
																														871026	C	['T']	1805981	T	['A']
																														871460	A	['G']	1806000	T	['C']
																														872123	G	['A']	1806357	A	['G']
																														872863	A	['G']	1806371	T	['C']
																														873773	T	['C']	1808750	G	['A']
																														874061	C	['A']	1809456	A	['G']
																														874338	G	['A']	1811374	A	['G']
																														874471	T	['C']	1813206	A	['C']
																														875110	T	['G']	1814557	T	['C']
																														875629	A	['G']	1814670	T	['C']
																														875683	T	['C']	1815237	A	['G']
																														875817	A	['G']	1833495	C	['T']
																														875991	A	['C']	1835447	G	['A']
																														876907	G	['C']	1835629	T	['G']
																														877337	A	['C']	1836592	A	['G']
																														878185	T	['C']	1838037	T	['G']
																														878861	C	['T']	1841001	A	['C']
																														880713	G	['A']	1845552	G	['A']
																														882203	G	['A']	1847279	T	['C']
																														882633	A	['G']	1848474	C	['A']
																														883401	C	['G']	1848515	T	['C']
																														883829	A	['G']	1849415	A	['C']
																														883924	A	['G']	1849918	G	['A']
																														885825	G	['C']	1849959	G	['A']
																														887664	A	['G']	1851182	T	['C']
																														888251	G	['T']	1851537	G	['T']
																														888252	A	['C']	1851911	G	['A']
																														888253	C	['A']	1852737	C	['T']
																														888256	C	['T']	1855443	A	['G']
																														888745	A	['C']	1856092	C	['G']
																														889318	C	['G']	1856582	A	['G']
																														890052	C	['T']	1857465	C	['T']
																														890635	A	['G']	1858330	T	['C']
																														891356	T	['C']	1864538	T	['C']
																														891677	T	['A']	1864854	C	['T']
																														891775	T	['C']	1865645	C	['T']
																														892371	T	['C']	1866245	T	['C']
																														892438	A	['G']	1867858	A	['G']
																														892769	T	['C']	1868008	G	['A']
																														892834	C	['G']	1868671	C	['T']
																														892990	T	['C']	1869238	A	['G']
																														892999	C	['A', 'G']	1873271	A	['C']
																														893492	T	['C']	1873352	C	['T']
																														894425	T	['C']	1877698	C	['T']
																														894605	A	['G']	1878691	A	['G']
																														896164	A	['C']	1879593	C	['T']
																														896711	T	['G']	1880240	C	['T']
																														896780	A	['G']	1881743	A	['G']
																														896953	A	['G']	1886886	T	['G']
																														897376	T	['C']	1889042	C	['T']
																														897398	T	['C']	1889227	A	['G']
																														897717	A	['G']	1889266	A	['G']
																														897739	A	['G']	1889701	G	['A']
																														904922	A	['C']	1890262	C	['A']
																														905021	A	['G']	1893728	A	['G']
																														905217	T	['C']	1894038	G	['T', 'C']
																														905330	C	['G']	1895371	A	['G']
																														906115	G	['T']	1895867	G	['A']
																														906134	T	['C']	1895936	A	['C']
																														906393	A	['C']	1898021	T	['G']
																														907002	T	['G']	1901323	C	['T']
																														907030	T	['C']	1901520	C	['T']
																														907330	T	['G']	1904549	T	['G']
																														907409	T	['C']	1905419	T	['C']
																														907785	C	['T']	1908027	G	['T']
																														908033	G	['C']	1909052	G	['A']
																														908172	G	['A']	1909767	A	['C']
																														908842	A	['C']	1910107	T	['G']
																														909218	A	['G']	1910154	T	['C']
																														909281	A	['G']	1912481	A	['G']
																														909586	T	['C']	1914499	G	['C']
																														909634	G	['A']	1914673	A	['C']
																														910139	G	['C']	1918496	A	['T']
																														910146	T	['G']	1919126	G	['A']
																														910206	A	['G']	1919418	T	['G']
																														910358	A	['G']	1920530	T	['C']
																														910419	T	['C']	1920711	C	['T']
																														911010	G	['A']	1921617	A	['G']
																														911212	T	['A']	1922028	T	['C']
																														911403	A	['G']	1922952	C	['T']
																														911449	A	['G']	1931958	T	['G']
																														911674	T	['C']	1933484	T	['G']
																														911699	A	['G']	1937182	A	['G']
																														912927	A	['G']	1938062	C	['T']
																														914244	A	['G']	1940500	A	['C']
																														914286	T	['C']	1940920	T	['C']
																														914505	G	['A']	1941796	T	['C']
																														914511	T	['C']	1942184	T	['C']
																														914787	A	['G']	1944040	T	['C']
																														914977	A	['G']	1944248	T	['G']
																														915109	C	['T']	1944687	T	['G']
																														915513	G	['A']	1945476	T	['C']
																														915523	A	['G']	1946776	G	['A']
																														915756	T	['C']	1946923	A	['G']
																														920186	A	['G']	1950804	T	['C']
																														920193	T	['C']	1951310	A	['G']
																														920230	C	['T']	1952364	T	['C']
																														920520	G	['A']	1957815	C	['A']
																														920550	T	['C']	1958017	C	['T']
																														920688	T	['C']	1958268	A	['G']
																														920781	T	['G']	1959052	G	['A']
																														921482	G	['A']	1960850	A	['C']
																														922964	T	['C']	1961883	A	['G']
																														924498	A	['C']	1963004	A	['G']
																														924988	C	['T']	1964057	G	['C']
																														928510	A	['G']	1966290	T	['C']
																														928841	T	['C']	1968192	G	['A']
																														931181	G	['T']	1969707	A	['G']
																														931227	G	['A']	1969981	G	['A']
																														931381	G	['C']	1970829	C	['G']
																														931386	A	['G']	1971052	A	['G']
																														931752	G	['A']	1978756	T	['G']
																														931883	T	['G']	1981991	A	['C']
																														931914	T	['C']	1982398	C	['T']
																														932179	G	['C']	1989214	A	['G']
																														932541	A	['G']	1989721	G	['A']
																														932791	A	['G']
																														933027	A	['G']
																														933440	A	['G']
																														933638	G	['C']
																														934370	T	['A']
																														934714	A	['G']
																														934982	T	['C']
																														934995	C	['G']
																														935527	C	['G']
																														935529	C	['G']
																														936320	C	['T']
																														936476	T	['C']
																														936642	A	['C']
																														937088	T	['C']
																														937450	A	['G']
																														937789	T	['C']
																														939071	T	['C']
																														939367	A	['C']
																														939380	A	['G']
																														939513	A	['G']
																														939753	A	['C']
																														939921	T	['C']
																														940146	C	['T']
																														940320	A	['G']
																														940435	T	['C']
																														940476	A	['G']
																														941620	G	['A']
																														941788	A	['G']
																														941865	A	['C']
																														943472	A	['G']
																														943766	C	['T']
																														944356	A	['G']
																														944845	A	['G']
																														944907	C	['T']
																														945242	A	['C']
																														947993	A	['G']
																														948543	A	['G']
																														950614	A	['G']
																														950723	A	['G']
																														951475	T	['G']
																														953434	C	['G']
																														953447	C	['T']
																														954429	A	['G']
																														954471	G	['A']
																														954675	G	['C']
																														955763	A	['G']
																														955861	A	['C']
																														956119	C	['G']
																														956566	G	['T']
																														956606	T	['C']
																														956794	T	['G']
																														956801	A	['G']
																														957367	A	['C']
																														957775	T	['G']
																														957926	G	['A']
																														958944	C	['G']
																														966423	A	['G']
																														966635	T	['G']
																														967407	T	['G']
																														967822	T	['C']
																														967827	A	['G']
																														967866	A	['G']
																														968149	A	['G']
																														968318	A	['C']
																														968545	A	['T']
																														968619	T	['C']
																														968688	T	['G']
																														968804	A	['G']
																														971567	T	['C']
																														971882	G	['A']
																														971921	T	['A', 'C']
																														972153	A	['G']
																														972799	T	['C']
																														972818	A	['C']
																														973892	A	['G']
																														974040	T	['C']
																														974724	A	['C']
																														974770	T	['G']
																														975112	A	['G']
																														975533	A	['G']
																														976141	T	['G']
																														978375	G	['T']
																														978958	G	['A']
																														979074	T	['C']
																														979385	T	['C']
																														979725	G	['A']
																														979841	A	['G']
																														981503	A	['G']
																														982021	A	['G']
																														982978	A	['G']
																														983861	A	['G']
																														984372	A	['G']
																														985096	A	['G']
																														986146	T	['G']
																														988065	G	['C']
																														988463	T	['C']
																														988499	G	['A']
																														989679	T	['G']
																														991178	T	['C']
																														991202	C	['T']
																														991851	C	['G']
																														992127	A	['C']
																														992224	A	['G']
																														992278	A	['G']
																														992797	T	['G']
																														992925	G	['A']
																														994725	T	['G']
																														996107	G	['C']
																														996320	C	['T']
																														996797	T	['G']
																														996844	A	['G']
																														998210	A	['G']
																														999642	A	['G']
																														999666	T	['C']
																														1000273	C	['T']
																														1000433	T	['G']
																														1000510	G	['C']
																														1001057	T	['C']
																														1001420	T	['C']
																														1002584	C	['T']
																														1003859	A	['G']
																														1004231	C	['A']
																														1004743	A	['G']
																														1008109	T	['C']
																														1008124	T	['G']
																														1008181	A	['G']
																														1008312	T	['C']
																														1008788	A	['C']
																														1009468	A	['G']
																														1012052	T	['C']
																														1012483	A	['G']
																														1012839	A	['C']
																														1012846	A	['G']
																														1013259	A	['G']
																														1014971	T	['C']
																														1015438	T	['G']
																														1015483	T	['G']
																														1016825	T	['G']
																														1017272	T	['C']
																														1017784	A	['G']
																														1018452	T	['C']
																														1018925	T	['C']
																														1019303	T	['C']
																														1020656	T	['C']
																														1020717	T	['C']
																														1022609	A	['G']
																														1023035	C	['G']
																														1024667	T	['C']
																														1025772	A	['G']
																														1026658	A	['G']
																														1026907	A	['G']
																														1027208	T	['C']
																														1027934	C	['T']
																														1029558	A	['G']
																														1029636	A	['G']
																														1029822	A	['G']
																														1030610	A	['C']
																														1031084	T	['C']
																														1033526	C	['T']
																														1034388	T	['G']
																														1036486	T	['C']
																														1038625	T	['G']
																														1039613	T	['G']
																														1042639	C	['T']
																														1042815	A	['C']
																														1042830	A	['G']
																														1043168	A	['G']
																														1044072	G	['A']
																														1044242	A	['G']
																														1045421	A	['G']
																														1046463	G	['A']
																														1046937	A	['C']
																														1048013	A	['G']
																														1060634	T	['C']
																														1060808	G	['T']
																														1061390	A	['G']
																														1061620	T	['C']
																														1063091	T	['C']
																														1064723	G	['C']
																														1064964	G	['A']
																														1066458	G	['A']
																														1067147	T	['C']
																														1068415	T	['C']
																														1068423	T	['C']
																														1068533	T	['C']
																														1068830	G	['C']
																														1068994	C	['T']
																														1069317	T	['C']
																														1069752	G	['A']
																														1072100	T	['C']
																														1072198	C	['T']
																														1073532	T	['C']
																														1075702	C	['T']
																														1075867	A	['C']
																														1076103	A	['G']
																														1076315	G	['C']
																														1076324	A	['C']
																														1076579	C	['T']
																														1078409	T	['G']
																														1079667	A	['G']
																														1082766	G	['C']
																														1082876	T	['C']
																														1083329	A	['G']
																														1084842	C	['G']
																														1084933	A	['G']
																														1085546	C	['G']
																														1086379	A	['G']
																														1087259	G	['C']
																														1087306	A	['G']
																														1087816	A	['C']
																														1088212	T	['G']
																														1088255	T	['C']
																														1089263	A	['G']
																														1089273	T	['C']
																														1089530	C	['T']
																														1090014	A	['C']
																														1090214	G	['A']
																														1090234	T	['C']
																														1091900	T	['C']
																														1091953	C	['T']
																														1092049	A	['G']
																														1093432	G	['A']
																														1093604	T	['G']
																														1093937	A	['G']
																														1095430	C	['T']
																														1095887	A	['C']
																														1096296	G	['A']
																														1096741	T	['C']
																														1098270	T	['C']
																														1098432	T	['C']
																														1098441	A	['G']
																														1098583	A	['G']
																														1098981	A	['C']
																														1099329	G	['A']
																														1099595	T	['C']
																														1100059	C	['G']
																														1100789	A	['C']
																														1100802	T	['G']
																														1101048	G	['C']
																														1101186	A	['G']
																														1101954	A	['G']
																														1102392	G	['C']
																														1102713	G	['A']
																														1102741	A	['G']
																														1104500	A	['G']
																														1104577	G	['A']
																														1105083	T	['C']
																														1105156	T	['G']
																														1105852	A	['G']
																														1105949	T	['G']
																														1105983	T	['C']
																														1107090	T	['G']
																														1107266	C	['A']
																														1107374	T	['C']
																														1107671	G	['A']
																														1109727	T	['G']
																														1110119	G	['C']
																														1110147	T	['C']
																														1110472	G	['A']
																														1111190	A	['T']
																														1111351	A	['G']
																														1111864	T	['C']
																														1112250	A	['C']
																														1112551	T	['C']
																														1112552	C	['G']
																														1112725	A	['G']
																														1114201	A	['G']
																														1114228	A	['G']
																														1114648	T	['G']
																														1115124	T	['C']
																														1120812	C	['G']
																														1123003	T	['G']
																														1123427	T	['C']
																														1125091	T	['G']
																														1126357	T	['C']
																														1126530	T	['C']
																														1126564	T	['G']
																														1126599	G	['A']
																														1127933	A	['G']
																														1128324	A	['G']
																														1128638	T	['C']
																														1128672	A	['G']
																														1130586	T	['C']
																														1133714	A	['G']
																														1133916	G	['C']
																														1134914	T	['C']
																														1135321	T	['C']
																														1135385	A	['C']
																														1136458	C	['T']
																														1136691	G	['A']
																														1137244	C	['T']
																														1139445	T	['G']
																														1139867	T	['C']
																														1142715	T	['C']
																														1143176	G	['C']
																														1143189	C	['T']
																														1143498	G	['A']
																														1143685	T	['C']
																														1143868	A	['G']
																														1144081	A	['C']
																														1144288	A	['G']
																														1144374	C	['G']
																														1144640	C	['A']
																														1145299	C	['G']
																														1145598	A	['G']
																														1145601	A	['G']
																														1146024	C	['T']
																														1146167	G	['A']
																														1146427	T	['C']
																														1146973	A	['G']
																														1147364	C	['A']
																														1147833	A	['C']
																														1148305	C	['T']
																														1148352	G	['A']
																														1149228	T	['C']
																														1150706	A	['C']
																														1150729	T	['G']
																														1150876	A	['G']
																														1150965	T	['C']
																														1151174	A	['G']
																														1162037	A	['G']
																														1162181	A	['G']
																														1162692	C	['T']
																														1163016	C	['G']
																														1163047	T	['C']
																														1163256	T	['C']
																														1165782	T	['C']
																														1166935	T	['G']
																														1167333	T	['C']
																														1168606	A	['G']
																														1168844	A	['G']
																														1170053	A	['G']
																														1171461	T	['C']
																														1171782	C	['G']
																														1172189	A	['G']
																														1173631	C	['T']
																														1177491	A	['G']
																														1177619	T	['C']
																														1178626	A	['G']
																														1178731	A	['G']
																														1181227	T	['C']
																														1182196	G	['C']
																														1182776	G	['A']
																														1183609	T	['G']
																														1184179	A	['G']
																														1184876	C	['G']
																														1185314	G	['C']
																														1185629	T	['C']
																														1186030	A	['C']
																														1186931	A	['G']
																														1187169	T	['C']
																														1187335	T	['C']
																														1189628	A	['G']
																														1189931	A	['G']
																														1191149	C	['G']
																														1191301	C	['A']
																														1191857	G	['A']
																														1191866	T	['C']
																														1192184	A	['G']
																														1192279	A	['G']
																														1194196	G	['A']
																														1198067	T	['G']
																														1198929	T	['G']
																														1198939	T	['C']
																														1199734	T	['G']
																														1199964	A	['G']
																														1200165	A	['G']
																														1200188	T	['C']
																														1201524	A	['G']
																														1202212	G	['C']
																														1202747	T	['C']
																														1202783	A	['G']
																														1203431	C	['T']
																														1204600	A	['G']
																														1205114	T	['C']
																														1205873	A	['G']
																														1206395	T	['G']
																														1206665	T	['C']
																														1208486	C	['T']
																														1209289	A	['G']
																														1209728	T	['A']
																														1209932	T	['C']
																														1210325	C	['A']
																														1210381	T	['C']
																														1212160	A	['G']
																														1213204	A	['G']
																														1213719	T	['C']
																														1213971	A	['C']
																														1214146	T	['G']
																														1214898	A	['C']
																														1217646	T	['G']
																														1218117	G	['C']
																														1219231	A	['G']
																														1223405	T	['C']
																														1224554	T	['C']
																														1225044	T	['G']
																														1225167	T	['C']
																														1226658	A	['G']
																														1226673	T	['C']
																														1227394	G	['A']
																														1228191	C	['G']
																														1230053	G	['C']
																														1230117	T	['G']
																														1230228	C	['T']
																														1230983	A	['G']
																														1231713	A	['G']
																														1231965	A	['G']
																														1232277	C	['T']
																														1233842	C	['T']
																														1234160	C	['G']
																														1234511	C	['T']
																														1234960	A	['C']
																														1235521	C	['A']
																														1236512	T	['A']
																														1236934	T	['C']
																														1237532	A	['C']
																														1238800	C	['G']
																														1238939	T	['C']
																														1239253	A	['G']
																														1240107	A	['C']
																														1240161	C	['T']
																														1240568	A	['G']
																														1240778	A	['C']
																														1240780	A	['G']
																														1240825	T	['C']
																														1241078	C	['G']
																														1241216	T	['C']
																														1241237	A	['G']
																														1241428	A	['G']
																														1242036	T	['C']
																														1243159	C	['A']
																														1244035	C	['T']
																														1244076	A	['C']
																														1244077	T	['A']
																														1244304	C	['G']
																														1244364	A	['G']
																														1246067	G	['A']
																														1246577	A	['G']
																														1246866	T	['C']
																														1247432	T	['C']
																														1247675	T	['C']
																														1247760	C	['G']
																														1248838	A	['G']
																														1248856	A	['C']
																														1249096	A	['G']
																														1249432	G	['A']
																														1249686	C	['T']
																														1251852	A	['G']
																														1253797	C	['T']
																														1253948	A	['G']
																														1254085	A	['G']
																														1254233	T	['C']
																														1256502	A	['G']
																														1257605	C	['A']
																														1257894	G	['C']
																														1258758	T	['C']
																														1259202	T	['C']
																														1259983	G	['C']
																														1259995	A	['G']
																														1260051	T	['A']
																														1260340	A	['C']
																														1260453	T	['C']
																														1261198	T	['C']
																														1261381	G	['C']
																														1264714	T	['C']
																														1264841	T	['C']
																														1265443	T	['C']
																														1265499	C	['T']
																														1265575	G	['C']
																														1265737	A	['T']
																														1266118	A	['G']
																														1267401	T	['C']
																														1268657	G	['C']
																														1269287	A	['C']
																														1270217	T	['C']
																														1271271	T	['C']
																														1271801	T	['G']
																														1275077	C	['A']
																														1275268	A	['G']
																														1275324	G	['A']
																														1275502	A	['G']
																														1276298	C	['A']
																														1276581	T	['C']
																														1276588	A	['T']
																														1277279	G	['A']
																														1277826	T	['C']
																														1277970	A	['C']
																														1278188	A	['G']
																														1278658	A	['G']
																														1278797	C	['G']
																														1279590	C	['T']
																														1279822	A	['G']
																														1279862	T	['C']
																														1280310	A	['C']
																														1280514	T	['C']
																														1280527	A	['G']
																														1280714	A	['G']
																														1280886	A	['G']
																														1281097	T	['C']
																														1281170	A	['C']
																														1281305	C	['A']
																														1282025	T	['C']
																														1282159	C	['T']
																														1282745	T	['C']
																														1283365	A	['G']
																														1283539	T	['C']
																														1284132	A	['G']
																														1286926	C	['T']
																														1287103	T	['C']
																														1287572	A	['G']
																														1288507	T	['C']
																														1290722	G	['A']
																														1291004	T	['C']
																														1291076	A	['G']
																														1292202	T	['G']
																														1292446	T	['C']
																														1295330	C	['T']
																														1295422	T	['C']
																														1295683	T	['G']
																														1295984	A	['G']
																														1296242	A	['C']
																														1296541	T	['C']
																														1297848	G	['A']
																														1299184	C	['G']
																														1299252	G	['C']
																														1300159	G	['A']
																														1300598	T	['C']
																														1300643	A	['G']
																														1300883	T	['C']
																														1302786	A	['G']
																														1304115	T	['C']
																														1305264	A	['G']
																														1305590	A	['C']
																														1307826	A	['C']
																														1308651	G	['A']
																														1311093	C	['T']
																														1311935	A	['G']
																														1313347	A	['G']
																														1313619	A	['T']
																														1313850	T	['C']
																														1313944	T	['C']
																														1314031	G	['A']
																														1314060	T	['C']
																														1314376	T	['C']
																														1314787	G	['T']
																														1315553	T	['G']
																														1315760	G	['A']
																														1315787	T	['G']
																														1315831	G	['C']
																														1316376	T	['G']
																														1316432	A	['G']
																														1316571	T	['A']
																														1316656	C	['T']
																														1318109	T	['C']
																														1318649	A	['G']
																														1318700	A	['G']
																														1318887	A	['C']
																														1319077	C	['T']
																														1320141	A	['C']
																														1320204	T	['G']
																														1322101	T	['C']
																														1322203	A	['G']
																														1322328	A	['G']
																														1322772	G	['C']
																														1322818	C	['A']
																														1323019	T	['C']
																														1323451	G	['A']
																														1324761	T	['C']
																														1325151	G	['T']
																														1325996	C	['T']
																														1326588	T	['G']
																														1326704	T	['C']
																														1326710	T	['C']
																														1329321	A	['C']
																														1329781	T	['C']
																														1330998	T	['C']
																														1331318	A	['G']
																														1331337	A	['G']
																														1331655	T	['C']
																														1332290	A	['C']
																														1332430	T	['C']
																														1332743	T	['G']
																														1333751	T	['G']
																														1336013	T	['C']
																														1337731	T	['C']
																														1337852	A	['C']
																														1338825	T	['C']
																														1344301	A	['C']
																														1344937	T	['C']
																														1345151	T	['C']
																														1345519	A	['G']
																														1345991	A	['C']
																														1345998	T	['C']
																														1346108	T	['C']
																														1347220	G	['A']
																														1347734	C	['T']
																														1347786	T	['C']
																														1347849	G	['A']
																														1347865	T	['A']
																														1348698	A	['G']
																														1349351	T	['G']
																														1349889	A	['G']
																														1349939	T	['C']
																														1350932	T	['C']
																														1355567	C	['T']
																														1355623	T	['C']
																														1356211	T	['C']
																														1357125	A	['G']
																														1357785	A	['G']
																														1358636	T	['C']
																														1361371	A	['G']
																														1362316	T	['C']
																														1362927	A	['G']
																														1363445	A	['C']
																														1363737	T	['C']
																														1364632	T	['C']
																														1364748	G	['C']
																														1365999	G	['A']
																														1367946	T	['C']
																														1368122	T	['C']
																														1368178	T	['C']
																														1368895	G	['C']
																														1369172	G	['A']
																														1369337	T	['C']
																														1369867	T	['C']
																														1370169	T	['C']
																														1370956	G	['C']
																														1372106	A	['G']
																														1373112	T	['C']
																														1373177	T	['C']
																														1374643	A	['G']
																														1374921	T	['C']
																														1375979	A	['C']
																														1376006	A	['G']
																														1376045	G	['A']
																														1376196	A	['G']
																														1376598	G	['C']
																														1376967	C	['G']
																														1377312	A	['G']
																														1377650	G	['C']
																														1377782	T	['G']
																														1377998	T	['C']
																														1379055	A	['G']
																														1380331	C	['T']
																														1380365	G	['A']
																														1380752	C	['G']
																														1380942	T	['G']
																														1381221	C	['T']
																														1382057	G	['A']
																														1382069	G	['C']
																														1382189	T	['C']
																														1382201	T	['C']
																														1382243	G	['C']
																														1383746	A	['C']
																														1383797	A	['G']
																														1383854	A	['G']
																														1383990	A	['G']
																														1385740	T	['G']
																														1386417	T	['C']
																														1387214	T	['C']
																														1387875	C	['T']
																														1388276	T	['G']
																														1388835	C	['T']
																														1390029	A	['G']
																														1391344	T	['C']
																														1392621	A	['G']
																														1394359	T	['C']
																														1394956	G	['A']
																														1399512	T	['C']
																														1400473	T	['C']
																														1400520	A	['G']
																														1401001	A	['G']
																														1401770	C	['T']
																														1404367	A	['G']
																														1404885	T	['G']
																														1405244	T	['C']
																														1405633	T	['C']
																														1405842	T	['C']
																														1408145	A	['C']
																														1409000	A	['G']
																														1409504	G	['A']
																														1409542	T	['G']
																														1409718	A	['C']
																														1410795	T	['A']
																														1411268	T	['G']
																														1411465	T	['C']
																														1411980	G	['A']
																														1412598	A	['G']
																														1413126	A	['G']
																														1413663	A	['G']
																														1414025	G	['C']
																														1414094	T	['C']
																														1414809	A	['G']
																														1414892	G	['T']
																														1415026	A	['G']
																														1415041	C	['T']
																														1417206	T	['C']
																														1418882	G	['C']
																														1419522	A	['G']
																														1420862	A	['C']
																														1421719	T	['C']
																														1421799	C	['A']
																														1422317	A	['G']
																														1422583	G	['T', 'C']
																														1422651	A	['G']
																														1425388	T	['C']
																														1427842	C	['T']
																														1427887	A	['C']
																														1428337	A	['G']
																														1430972	A	['G']
																														1433740	T	['G']
																														1434069	A	['G']
																														1434375	A	['G']
																														1434596	T	['C']
																														1435909	A	['G']
																														1435994	A	['G']
																														1436344	A	['G']
																														1437108	C	['T']
																														1437405	A	['G']
																														1437406	G	['C']
																														1439230	C	['G']
																														1441463	A	['G']
																														1441482	A	['G']
																														1442496	T	['C']
																														1443427	A	['G']
																														1446318	G	['T']
																														1446943	C	['T']
																														1448256	T	['C']
																														1448311	T	['C']
																														1448916	A	['G']
																														1448958	C	['T']
																														1450781	A	['G']
																														1450897	A	['G']
																														1450939	C	['G']
																														1451118	T	['C']
																														1451500	C	['T']
																														1451777	A	['G']
																														1451809	T	['C']
																														1452312	A	['G']
																														1453903	T	['C']
																														1454442	A	['C']
																														1456601	T	['C']
																														1457794	A	['C']
																														1459125	T	['C']
																														1459182	A	['C']
																														1460380	A	['C']
																														1462101	T	['G']
																														1462558	G	['A']
																														1463279	T	['G']
																														1464441	C	['A']
																														1466907	T	['G']
																														1467270	T	['C']
																														1467384	A	['G']
																														1468239	G	['A']
																														1468538	G	['A']
																														1470222	A	['G']
																														1470413	A	['G']
																														1471310	A	['C']
																														1472935	T	['C']
																														1473248	G	['A']
																														1474213	A	['G']
																														1474496	A	['G']
																														1474959	A	['G']
																														1476165	C	['T']
																														1476539	G	['C']
																														1478174	T	['C']
																														1478842	A	['G']
																														1479478	T	['G']
																														1479625	A	['G']
																														1479627	C	['T']
																														1479672	A	['G']
																														1480362	A	['G']
																														1480406	T	['C']
																														1483473	A	['G']
																														1483578	T	['C']
																														1484625	A	['G']
																														1485183	T	['C']
																														1486193	C	['T']
																														1486248	T	['C']
																														1487162	A	['G']
																														1487559	C	['G']
																														1489191	T	['C']
																														1489206	A	['C']
																														1489380	G	['T']
																														1489794	C	['G']
																														1491425	G	['C']
																														1491542	T	['G']
																														1491592	T	['A']
																														1494536	A	['G']
																														1498528	A	['G']
																														1500099	T	['C']
																														1501303	A	['G']
																														1502814	A	['G']
																														1505559	A	['G']
																														1505828	G	['A']
																														1506488	T	['C']
																														1506956	T	['C']
																														1508814	T	['G']
																														1509029	A	['G']
																														1509268	T	['C']
																														1509381	C	['T']
																														1510051	T	['C']
																														1510145	G	['C']
																														1510227	C	['T']
																														1510862	C	['T']
																														1510961	T	['C']
																														1511320	T	['C']
																														1511832	C	['G']
																														1512122	T	['C']
																														1513339	T	['C']
																														1515745	C	['T']
																														1515989	A	['G']
																														1516735	G	['A']
																														1517381	A	['G']
																														1518093	A	['G']
																														1521477	A	['G']
																														1521718	G	['A']
																														1523006	G	['A']
																														1523880	A	['C']
																														1524140	T	['G']
																														1525157	T	['A']
																														1525710	C	['A']
[truncated: 617 more rows]

## Sheet: core genome effector regions
# unique singe nucleotide variants in effector-coding genes in core genome region, relative to Nine Mile I reference genome (GCF_000007765.2)
GGIII-like			I			II-a			II-b			II-c			III			IV-a			IV-b - without strain Namibia			V			VI			strain Namibia (MST ST30)
Position	Base	Other Groups Bases	Position	Base	Other Groups Bases	Position	Base	Other Groups Bases	Position	Base	Other Groups Bases	Position	Base	Other Groups Bases	Position	Base	Other Groups Bases	Position	Base	Other Groups Bases	Position	Base	Other Groups Bases	Position	Base	Other Groups Bases	Position	Base	Other Groups Bases	Position	Base	Other Groups Bases
12399	A	['G']	19322	T	['C']	18518	T	['C']	296065	A	['G']	837468	T	['C']	38620	G	['C']	57212	A	['G']	157098	T	['C']	12232	C	['T']	18907	G	['A']	12936	C	['T']
19189	G	['C']	19472	T	['A']	172310	A	['G']	765971	T	['C']	1611501	T	['C']	39048	A	['C']	71909	G	['C']	197228	T	['C']	18375	A	['G']	19212	T	['C']	19314	T	['C']
105793	T	['C']	105854	A	['G']	583875	A	['G']	1514719	T	['C']	1793055	T	['C']	105727	T	['C']	157111	G	['A']	377936	C	['A']	18478	A	['G']	19870	A	['C']	19367	T	['G']
262831	T	['C']	156818	T	['C']	1517839	A	['G']	1618374	C	['G']				111863	T	['G']	157452	G	['C']	551359	A	['C']	19220	C	['G']	19924	C	['A']	20418	C	['T']
295889	T	['C' 'A']	262338	G	['C']	1966381	T	['G']							156824	T	['C']	262358	T	['C']	967773	A	['G']	19774	T	['C']	20323	C	['G']	20428	G	['A']
336502	A	['G']	311992	A	['G']	1980689	T	['C']							295889	A	['C' 'T']	377746	T	['A']	1505544	A	['G']	20446	A	['G']	38338	T	['C']	20583	T	['A']
551294	C	['T']	366825	G	['A']										607482	G	['A']	479437	T	['G']	1524359	A	['G']	20557	T	['A']	57054	A	['G']	38806	A	['G']
571140	A	['G']	607298	G	['A']										765483	T	['C']	551319	A	['G']	1617848	C	['A']	38835	A	['C']	73372	G	['A']	56532	C	['T']
930431	A	['C']	765759	T	['C']										887656	A	['G']	586283	C	['G']	1751243	T	['C']	55901	A	['G']	111891	T	['C']	73203	T	['C']
987638	G	['C']	766309	T	['C']										1008092	T	['G']	837920	C	['T']	1878227	C	['T']	56386	G	['A']	131640	T	['G']	117651	T	['C']
1411582	C	['T']	766841	A	['C']										1298958	C	['T']	838492	T	['C']	1913397	T	['C' 'G']	56593	A	['G']	132260	C	['T']	172306	A	['G']
1415036	T	['C']	1320083	T	['C']										1319884	T	['C']	968235	A	['C']	1914126	A	['G']	56837	G	['A']	263181	T	['A']	242355	C	['T']
1505470	A	['G']	1358599	A	['G']										1373163	C	['A']	987541	G	['C']	1966837	A	['G']	73129	T	['C']	311691	A	['G']	335425	G	['C']
1506869	T	['G']	1414409	A	['T']										1410438	A	['C']	1095635	A	['G']	1967218	A	['G']	73254	A	['C']	311695	G	['C']	349523	A	['C']
1524704	T	['G']	1414524	A	['G']										1411538	G	['C']	1299092	A	['C']				73418	T	['G']	339126	T	['C']	349597	A	['G']
1579730	A	['G']	1415904	A	['C']										1611122	T	['C']	1299864	T	['G']				131313	T	['C']	339384	G	['A']	352516	G	['C']
1617751	G	['A']	1416889	C	['T']										1657524	A	['G']	1319697	T	['G']				131549	A	['G']	349112	A	['C']	366571	T	['C']
1618544	C	['T']	1446100	G	['T']										1682942	C	['A']	1329457	A	['C']				132124	C	['T']	352716	A	['G']	377887	C	['T']
1683489	A	['G']	1446262	T	['C']										1683262	A	['C']	1329623	G	['A']				197081	A	['G']	377414	A	['G']	479439	C	['T']
1980323	A	['G']	1447397	C	['T']										1683774	A	['G']	1358563	A	['G']				197176	C	['T']	378056	T	['C']	479505	G	['A']
			1479617	A	['G']										1723898	A	['G']	1414975	C	['T']				197210	A	['G']	453780	C	['T']	584606	C	['G']
			1517126	A	['G']										1724004	A	['G']	1417182	A	['G']				242235	G	['A']	453968	C	['T']	607374	A	['G']
			1517750	A	['G']										1913610	C	['G' 'A']	1447316	T	['C']				262967	T	['G']	551219	C	['A']	607390	G	['A']
			1579606	T	['C']										1980708	C	['T']	1481101	C	['T']				296207	C	['T']	570666	T	['C']	607885	G	['A']
			1618199	T	['C']													1506172	G	['C']				296278	A	['G']	571637	A	['G']	723025	C	['T']
			1618788	A	['G']													1552315	T	['G']				335845	T	['C']	718337	G	['A']	743812	C	['T']
			1683810	A	['C']													1576462	A	['C']				339167	A	['G']	744074	A	['C']	766237	G	['A']
			1683840	A	['G']													1577085	T	['C']				339398	G	['A']	765728	T	['C']	837786	A	['G']
			1687333	A	['G']													1610742	T	['C']				349761	A	['G']	766260	G	['T']	886924	G	['A']
			1750219	G	['A']													1617278	T	['G']				349820	G	['A']	837923	C	['T']	887051	A	['C']
			1753465	C	['T']													1658112	T	['G']				369990	T	['G']	887879	A	['C']	887135	G	['A']
			1792308	A	['G']													1682081	A	['C']				377385	T	['C']	930482	G	['A']	930677	C	['G']
			1879524	T	['C']													1685281	T	['C']				377446	T	['C']	968403	T	['G']	967757	T	['A' 'G']
			1913614	T	['A' 'C']													1688510	C	['T']				378191	T	['A']	987784	A	['C']	968661	A	['G']
			1913619	A	['C']													1721397	G	['C']				378354	A	['G']	1095861	T	['C']	987420	T	['A']
			1920563	A	['C']													1722882	A	['C']				378421	A	['G']	1095900	T	['C']	1008660	G	['C']
			1920855	C	['T']													1724033	G	['A']				411595	A	['G']	1298858	C	['T']	1095343	G	['A']
			1962629	C	['G']													1726246	G	['C']				453816	A	['G']	1299344	T	['C']	1095492	A	['G']
																		1726247	C	['G']				453873	T	['G']	1328971	T	['G']	1298534	G	['A']
																		1753860	A	['C']				454509	T	['G']	1329176	C	['T']	1320389	G	['A']
																		1754193	G	['T']				479355	A	['G']	1386761	C	['G']	1329923	C	['G']
																		1791810	A	['C']				479417	T	['A']	1411626	A	['G']	1373258	G	['A']
																		1879192	T	['C']				551554	A	['T']	1414618	A	['G']	1411519	A	['G']
																		1913208	A	['G']				551664	T	['C']	1414693	C	['T']	1416631	A	['G']
																		1936006	T	['G']				570302	T	['G']	1417834	C	['T']	1416654	C	['T']
																		1958255	A	['C']				570631	A	['C']	1446519	G	['A']	1416801	A	['G']
																		1962830	T	['C']				570984	G	['A']	1446697	A	['C']	1416957	C	['A']
																		1967248	T	['C']				583300	G	['A']	1447135	A	['G']	1446225	T	['G']
																		1967401	A	['T']				583824	T	['C']	1471712	A	['C']	1480038	G	['A']
																								584148	A	['C']	1472099	G	['A']	1480935	G	['C']
																								584246	T	['G']	1505486	G	['A']	1481143	T	['C']
																								584385	G	['C']	1505786	C	['T']	1505469	T	['G']
																								585846	A	['G' 'T']	1517531	G	['A']	1506936	C	['G']
																								607483	A	['C']	1524445	T	['C']	1514456	C	['G']
																								718121	T	['C']	1525027	C	['T']	1516962	G	['C']
																								723100	A	['G']	1539467	G	['T']	1517226	C	['T']
																								743813	T	['C']	1552358	C	['T']	1517423	G	['C']
																								743893	A	['G']	1576492	C	['T']	1517794	G	['A']
																								744218	A	['C']	1579250	C	['T']	1524049	T	['G']
																								765494	A	['G']	1579880	T	['G']	1576906	G	['A']
																								765496	T	['G']	1610647	C	['T']	1617071	G	['A']
																								765643	C	['A']	1611004	A	['G']	1617873	C	['T']
																								765684	T	['C']	1611577	A	['G']	1618246	C	['T' 'G']
																								765886	A	['T']	1618389	T	['C']	1618702	A	['G']
																								766044	A	['G']	1618923	G	['A']	1657445	C	['T']
																								766227	A	['C']	1619145	T	['G']	1657546	G	['A']
																								766963	C	['T']	1658511	A	['C']	1659010	C	['T']
																								837600	A	['T']	1658601	T	['C']	1681957	A	['G']
																								837899	A	['G']	1682321	G	['A']	1682945	G	['A']
																								837928	A	['G']	1683061	T	['C']	1683625	T	['G']
																								838156	T	['C']	1683145	A	['C']	1700850	T	['A']
																								887664	A	['G']	1683627	A	['G']	1723289	T	['C']
																								967822	T	['C']	1683829	T	['A']	1725925	T	['G']
																								967827	A	['G']	1688212	C	['T']	1726368	C	['T']
																								967866	A	['G']	1688369	C	['T']	1749259	G	['A']
																								968149	A	['G']	1688846	C	['T']	1749753	G	['A']
																								968318	A	['C']	1722119	T	['C']	1749834	C	['T']
																								968545	A	['T']	1723535	A	['G']	1750001	G	['A']
																								968619	T	['C']	1726178	A	['C']	1750038	C	['T']
																								968688	T	['G']	1726290	T	['G']	1750318	C	['A']
																								968804	A	['G']	1749538	G	['A']	1750655	A	['C']
																								1008109	T	['C']	1750117	T	['G']	1754145	G	['C']
																								1008124	T	['G']	1751092	T	['G']	1754904	G	['A']
																								1008181	A	['G']	1877698	C	['T']	1877992	G	['A']
																								1008312	T	['C']	1878691	A	['G']	1935729	A	['G']
																								1008788	A	['C']	1920530	T	['C']	1958510	A	['C']
																								1095430	C	['T']	1920711	C	['T']	1958729	G	['A']
																								1095887	A	['C']	1958268	A	['G']
																								1142715	T	['C']	1966290	T	['C']
																								1162037	A	['G']	1978756	T	['G']
																								1162181	A	['G']
																								1162692	C	['T']
																								1163016	C	['G']
																								1163047	T	['C']
																								1163256	T	['C']
																								1219231	A	['G']
																								1264714	T	['C']
																								1264841	T	['C']
																								1299184	C	['G']
																								1299252	G	['C']
																								1320141	A	['C']
																								1320204	T	['G']
																								1329321	A	['C']
																								1329781	T	['C']
																								1337731	T	['C']
																								1337852	A	['C']
																								1358636	T	['C']
																								1373177	T	['C']
																								1386417	T	['C']
																								1410795	T	['A']
																								1411268	T	['G']
																								1411465	T	['C']
																								1411980	G	['A']
																								1414809	A	['G']
																								1414892	G	['T']
																								1415026	A	['G']
																								1415041	C	['T']
																								1417206	T	['C']
																								1446318	G	['T']
																								1446943	C	['T']
																								1479478	T	['G']
																								1479625	A	['G']
																								1479627	C	['T']
																								1479672	A	['G']
																								1480362	A	['G']
																								1480406	T	['C']
																								1505559	A	['G']
																								1505828	G	['A']
																								1506488	T	['C']
																								1506956	T	['C']
																								1516735	G	['A']
																								1517381	A	['G']
																								1523880	A	['C']
																								1524140	T	['G']
																								1525157	T	['A']
																								1525710	C	['A']
																								1552398	A	['C']
																								1576664	G	['A']
																								1576689	A	['C']
																								1579015	A	['T']
																								1610330	C	['T']
																								1610381	T	['C']
																								1616600	T	['G' 'A']
																								1617458	G	['A']
																								1617578	A	['G']
																								1618098	T	['G']
																								1618104	T	['C']
																								1618778	A	['G']
																								1619814	T	['G']
																								1619968	C	['T']
																								1620054	T	['C']
																								1657302	T	['A']
																								1657348	G	['C']
																								1658772	A	['G']
																								1659253	T	['C']
																								1681971	C	['G']
																								1682415	A	['G']
																								1682893	A	['G']
																								1683482	A	['C']
																								1683672	G	['A']
																								1683676	C	['T' 'A']
																								1684253	A	['G']
																								1687598	A	['C']
																								1687630	A	['G']
																								1688054	C	['T']
																								1689048	A	['C']
																								1689385	C	['T']
																								1689392	T	['C']
																								1722117	G	['C']
																								1723096	G	['A']
																								1724090	G	['C']
																								1725885	A	['C']
																								1749273	T	['C']
																								1749473	C	['A']
																								1750566	T	['A']
																								1750771	A	['C']
																								1751209	T	['G']
																								1751362	T	['C']
																								1753753	G	['A']
																								1753799	T	['G']
																								1754447	A	['G']
																								1754842	A	['G']
																								1754898	A	['G']
																								1754991	A	['G']
																								1755004	A	['G']
																								1791841	C	['T']
																								1791915	A	['C']
																								1877754	T	['G']
																								1878605	A	['C']
																								1913225	G	['T']
																								1913526	C	['T']
																								1913733	C	['A']
																								1913775	C	['G']
																								1913889	G	['C']
																								1923536	T	['C']
																								1923595	C	['T']
																								1935531	A	['G']
																								1935783	G	['C']
																								1935975	T	['C']
																								1962683	C	['G']
																								1962731	T	['C']
																								1966203	T	['C']
																								1966455	C	['T']
																								1966503	A	['G']
																								1966653	C	['A']
																								1966939	A	['C' 'G']
																								1967313	A	['G']
																								1967331	A	['G']
																								1967524	A	['G']
																								1978755	G	['A']
