# Supplementary material for: Genome characteristics and type IV effector protein repertoire of Coxiella burnetii depend rather on Genomic Groups than on host species
Source: BMC Microbiol. 2026 Apr 22;26:393. doi: 10.1186/s12866-026-04897-w (PMC13104383; doi:10.1186/s12866-026-04897-w)
Supplement: Supplementary file 8 — Additional file 8: Table S6. Sequence variations of detected effector proteins. Sequence variants of T4BSS effector proteins detected in the investigated C. burnetii strains. A num-ber was assigned to each variation. [file 12866_2026_4897_MOESM8_ESM.xlsx]

## Sheet: Tabelle1
Accession	Host	GG	CBUD_RS08635	CBUD_RS11275	CBU_0012	CBU_0021	CBU_0041	CBU_0048	CBU_0049	CBU_0062	CBU_0069	CBU_0072	CBU_0077	CBU_0113	CBU_0122	CBU_0128	CBU_0144	CBU_0175	CBU_0183	CBU_0201	CBU_0270	CBU_0295	CBU_0344	CBU_0372	CBU_0388	CBU_0410	CBU_0425	CBU_0447	CBU_0469	CBU_0487	CBU_0505	CBU_0513	CBU_0519	CBU_0534	CBU_0542	CBU_0547	CBU_0590	CBU_0626	CBU_0635	CBU_0637	CBU_0649	CBU_0665	CBU_0773	CBU_0781	CBU_0790	CBU_0794	CBU_0801	CBU_0814	CBU_0822
15QC1192	Sheep	II-a	13	missing	1	13	disrupted	9	4	4	disrupted	2	3	1	7	truncated_at_n	disrupted	3	truncated_at_n	2	1	disrupted	disrupted	13	7	4	truncated_at_n	1	1	5	1	5	1	3	8	4	disrupted	5	disrupted	3	4	truncated_at_n	1	disrupted	disrupted	12	1	disrupted	1
15QC1194	Sheep	II-a	13	missing	1	13	disrupted	9	4	4	disrupted	2	3	1	7	truncated_at_n	disrupted	3	truncated_at_n	2	1	disrupted	disrupted	13	7	5	truncated_at_n	1	1	5	1	5	1	3	8	4	disrupted	5	disrupted	3	4	truncated_at_n	1	disrupted	disrupted	12	1	disrupted	1
15QC1195	Sheep	II-a	13	missing	1	13	disrupted	9	4	4	disrupted	2	3	1	7	truncated_at_n	disrupted	3	truncated_at_n	2	1	disrupted	disrupted	13	7	4	truncated_at_n	1	1	5	1	5	1	3	8	4	disrupted	5	disrupted	3	4	truncated_at_n	1	disrupted	disrupted	12	1	disrupted	1
15QC1196	Goat	II-a	13	missing	1	13	disrupted	9	4	4	disrupted	2	3	1	7	truncated_at_n	disrupted	3	truncated_at_n	2	1	disrupted	disrupted	13	7	5	truncated_at_n	1	1	5	1	5	1	3	8	4	disrupted	5	disrupted	3	4	truncated_at_n	1	disrupted	disrupted	12	1	disrupted	1
15QC1197	Cattle	II-a	13	missing	1	13	disrupted	9	4	4	disrupted	2	3	1	7	truncated_at_n	disrupted	3	truncated_at_n	2	1	disrupted	disrupted	13	7	4	truncated_at_n	1	1	5	1	5	1	3	8	4	disrupted	5	disrupted	3	4	truncated_at_n	1	disrupted	disrupted	12	1	disrupted	1
15QC1330	Cattle	III	13	missing	1	14	disrupted	disrupted	1	8	disrupted	1	1	1	9	truncated_at_n	disrupted	2	truncated_at_n	2	1	4	disrupted	5	7	3	truncated_at_n	1	1	5	1	5	1	3	7	5	disrupted	5	disrupted	3	2	4	1	5	disrupted	truncated_at_c	1	disrupted	1
15QC1343	Goat	II-a	13	missing	1	13	disrupted	9	4	4	disrupted	2	3	1	7	truncated_at_n	disrupted	3	truncated_at_n	2	1	disrupted	disrupted	13	7	5	truncated_at_n	1	1	5	1	5	1	3	8	4	disrupted	5	disrupted	3	4	truncated_at_n	1	disrupted	disrupted	12	1	disrupted	1
15QC1346	Sheep	II-a	13	missing	1	13	disrupted	9	4	4	disrupted	2	3	1	7	truncated_at_n	disrupted	3	truncated_at_n	2	1	disrupted	disrupted	13	7	4	truncated_at_n	1	1	5	1	5	1	3	8	4	disrupted	5	disrupted	3	4	truncated_at_n	1	disrupted	disrupted	12	1	disrupted	1
15QC1348	Sheep	II-a	13	missing	1	13	disrupted	9	4	4	disrupted	2	3	1	7	truncated_at_n	disrupted	3	truncated_at_n	2	1	disrupted	disrupted	13	7	5	truncated_at_n	1	1	5	1	5	1	3	8	4	disrupted	5	disrupted	3	4	truncated_at_n	1	disrupted	disrupted	12	1	disrupted	1
15QC1349	Human	II-a	13	missing	1	13	disrupted	9	4	4	disrupted	2	3	1	7	truncated_at_n	disrupted	3	truncated_at_n	2	1	disrupted	disrupted	13	7	5	truncated_at_n	1	1	5	1	5	1	3	8	4	disrupted	5	disrupted	3	4	truncated_at_n	1	disrupted	disrupted	12	1	disrupted	1
18QC0072	Goat	II-a	13	missing	1	13	disrupted	9	4	4	disrupted	2	3	1	7	truncated_at_n	disrupted	3	truncated_at_n	2	1	disrupted	disrupted	13	7	5	truncated_at_n	1	1	5	1	5	1	3	8	4	disrupted	5	disrupted	3	4	truncated_at_n	1	disrupted	disrupted	12	1	disrupted	1
18QC0075	Goat	III	13	missing	1	14	disrupted	disrupted	1	8	disrupted	1	1	1	9	truncated_at_n	disrupted	2	truncated_at_n	2	1	4	disrupted	5	7	3	truncated_at_n	1	1	5	1	5	1	3	7	5	disrupted	5	disrupted	3	2	4	1	5	disrupted	truncated_at_c	1	disrupted	1
18QC1769	Tick	I	disrupted	missing	disrupted	11	13	3	2	8	disrupted	1	1	2	8	truncated_at_n	disrupted	3	truncated_at_n	2	1	5	disrupted	10	6	6	truncated_at_n	1	1	5	1	5	1	2	11	6	disrupted	7	13	3	4	7	1	5	disrupted	11	1	disrupted	1
18QC1770	Cattle	III	13	missing	1	14	disrupted	disrupted	1	8	disrupted	1	1	1	9	truncated_at_n	disrupted	2	truncated_at_n	2	1	4	disrupted	5	7	3	truncated_at_n	1	1	5	1	5	1	3	7	5	disrupted	5	disrupted	3	2	4	1	5	disrupted	truncated_at_c	1	disrupted	1
18QC1771	Cattle	II-a	13	missing	1	13	disrupted	9	4	4	disrupted	2	3	1	7	truncated_at_n	disrupted	3	truncated_at_n	2	1	disrupted	disrupted	13	7	5	truncated_at_n	1	1	5	1	5	1	3	8	4	disrupted	5	disrupted	3	4	truncated_at_n	1	disrupted	disrupted	12	1	disrupted	1
18QC1773	Sheep	II-a	13	missing	1	13	disrupted	9	4	4	disrupted	2	3	1	7	truncated_at_n	disrupted	3	truncated_at_n	2	1	disrupted	disrupted	13	7	5	truncated_at_n	1	1	5	1	5	1	3	8	4	disrupted	5	disrupted	3	4	truncated_at_n	1	disrupted	disrupted	12	1	disrupted	1
18QC1774	Goat	II-a	13	missing	1	13	disrupted	9	4	4	disrupted	2	3	1	7	truncated_at_n	disrupted	3	truncated_at_n	2	1	disrupted	disrupted	13	7	5	truncated_at_n	1	1	5	1	5	1	3	8	4	disrupted	5	disrupted	3	4	truncated_at_n	1	disrupted	disrupted	12	1	disrupted	1
18QC1775	Goat	II-a	13	missing	1	13	disrupted	9	4	4	disrupted	2	3	1	7	truncated_at_n	disrupted	3	truncated_at_n	2	1	disrupted	disrupted	13	7	5	truncated_at_n	1	1	5	1	5	1	3	8	4	disrupted	5	disrupted	3	4	truncated_at_n	1	disrupted	disrupted	12	1	disrupted	1
19QC0291	Cattle	III	13	missing	1	19	disrupted	disrupted	1	8	disrupted	1	1	1	9	truncated_at_n	disrupted	2	truncated_at_n	2	1	4	disrupted	5	7	3	truncated_at_n	1	1	5	1	5	1	3	7	5	disrupted	5	disrupted	3	3	4	1	5	disrupted	truncated_at_c	1	disrupted	1
21QC0776	Cattle	III	15	missing	1	14	disrupted	disrupted	1	8	disrupted	1	1	1	9	truncated_at_n	disrupted	2	truncated_at_n	2	1	4	disrupted	5	8	3	truncated_at_n	1	1	5	1	5	1	3	7	5	truncated_at_c	5	disrupted	3	2	4	1	5	disrupted	truncated_at_c	1	disrupted	1
21QC0869	Cattle	III	13	missing	1	14	disrupted	disrupted	1	8	disrupted	1	1	1	9	truncated_at_n	disrupted	2	truncated_at_n	2	1	4	disrupted	5	7	3	truncated_at_n	1	1	5	1	5	1	3	7	5	disrupted	5	disrupted	3	2	4	truncated_at_c	5	disrupted	truncated_at_c	1	disrupted	1
22QC0001	Cattle	III	13	missing	1	14	disrupted	disrupted	1	8	disrupted	1	1	1	9	truncated_at_n	disrupted	2	truncated_at_n	2	1	4	disrupted	5	7	3	truncated_at_n	1	1	5	1	5	1	3	7	5	disrupted	5	disrupted	3	2	4	1	5	disrupted	truncated_at_c	1	disrupted	1
22QC1334	Cattle	II-a	13	missing	1	13	disrupted	9	4	4	disrupted	2	3	1	7	truncated_at_n	disrupted	3	truncated_at_n	2	1	disrupted	disrupted	13	7	5	truncated_at_n	1	1	5	1	5	1	3	8	4	disrupted	5	disrupted	3	4	truncated_at_n	1	disrupted	disrupted	12	1	disrupted	1
22QC1335	Cattle	III	13	missing	1	14	disrupted	disrupted	1	8	disrupted	1	1	1	9	truncated_at_n	disrupted	2	truncated_at_n	2	1	4	disrupted	5	7	3	truncated_at_n	1	1	5	1	5	1	3	7	5	disrupted	5	disrupted	3	2	4	1	5	disrupted	truncated_at_c	1	disrupted	1
22QC1336	Cattle	III	13	missing	1	14	disrupted	disrupted	1	8	disrupted	1	1	1	9	truncated_at_n	disrupted	2	truncated_at_n	2	1	4	disrupted	5	7	3	truncated_at_n	1	1	5	1	5	1	3	7	5	disrupted	5	disrupted	3	2	4	1	5	disrupted	truncated_at_c	1	disrupted	1
22QC1338	Cattle	III	13	missing	1	14	disrupted	disrupted	1	8	disrupted	1	1	1	9	truncated_at_n	disrupted	2	truncated_at_n	2	1	4	disrupted	5	7	3	truncated_at_n	1	1	5	1	5	1	3	7	5	disrupted	5	14	3	2	4	1	5	disrupted	truncated_at_c	1	disrupted	1
22QC1339	Cattle	II-a	13	missing	1	13	disrupted	9	4	4	disrupted	2	3	1	7	truncated_at_n	disrupted	3	truncated_at_n	2	1	disrupted	disrupted	13	7	5	truncated_at_n	1	1	5	1	5	1	3	8	4	disrupted	5	disrupted	3	4	truncated_at_n	1	disrupted	disrupted	12	1	disrupted	1
22QC1340	Cattle	III	13	missing	1	14	disrupted	disrupted	1	8	disrupted	1	1	3	9	truncated_at_n	disrupted	2	truncated_at_n	2	1	4	disrupted	5	7	3	truncated_at_n	1	1	5	1	5	1	3	7	5	disrupted	5	disrupted	3	2	4	1	5	disrupted	truncated_at_c	1	disrupted	1
22QC1341	Cattle	III	13	missing	1	14	disrupted	disrupted	1	8	disrupted	1	1	1	9	truncated_at_n	disrupted	2	truncated_at_n	2	1	4	disrupted	5	7	3	truncated_at_n	1	1	5	1	5	1	3	7	5	disrupted	5	disrupted	3	2	4	1	5	disrupted	truncated_at_c	1	disrupted	1
22QC1342	Cattle	III	13	missing	1	14	disrupted	disrupted	1	8	disrupted	1	1	1	9	truncated_at_n	disrupted	2	truncated_at_n	2	1	4	disrupted	5	7	3	truncated_at_n	1	1	5	1	5	1	3	7	5	disrupted	5	disrupted	3	2	4	1	5	disrupted	truncated_at_c	1	disrupted	1
22QC1343	Cattle	III	13	missing	1	14	disrupted	disrupted	1	8	disrupted	1	1	1	9	truncated_at_n	disrupted	2	truncated_at_n	2	1	4	disrupted	5	7	3	truncated_at_n	1	1	5	1	5	1	3	7	5	disrupted	5	disrupted	3	2	4	1	5	disrupted	truncated_at_c	1	disrupted	1
23QC0408	Sheep	II-b	truncated_at_n	missing	disrupted	15	disrupted	3	5	4	missing	missing	1	1	7	truncated_at_n	disrupted	3	truncated_at_n	2	1	4	disrupted	8	1	truncated_at_c	truncated_at_n	1	1	1	1	5	1	4	9	4	disrupted	1	disrupted	truncated_at_n	4	disrupted	1	5	disrupted	8	1	disrupted	1
23QC0414	Sheep	II-a	13	missing	1	13	disrupted	9	4	4	disrupted	2	3	1	7	truncated_at_n	disrupted	3	truncated_at_n	2	1	disrupted	disrupted	13	7	4	truncated_at_n	1	1	5	1	5	1	3	8	4	disrupted	5	disrupted	3	4	truncated_at_n	1	disrupted	disrupted	12	1	disrupted	1
23QC0415	Sheep	II-a	13	missing	1	13	disrupted	9	4	4	disrupted	2	3	1	7	truncated_at_n	disrupted	3	truncated_at_n	2	1	disrupted	disrupted	13	7	4	truncated_at_n	1	1	5	1	5	1	3	8	4	disrupted	5	disrupted	3	4	truncated_at_n	1	disrupted	disrupted	12	1	disrupted	1
23QC0422	Tick	I	disrupted	missing	disrupted	11	13	3	2	8	disrupted	1	1	2	8	truncated_at_n	disrupted	3	truncated_at_n	2	1	5	disrupted	10	6	6	truncated_at_n	1	1	5	1	5	1	2	11	6	disrupted	7	13	3	4	7	1	5	disrupted	11	1	disrupted	1
23QC0438	Goat	III	13	missing	1	14	disrupted	disrupted	1	8	disrupted	1	1	1	9	truncated_at_n	disrupted	2	truncated_at_n	2	1	4	disrupted	5	7	3	truncated_at_n	1	1	5	1	5	1	3	7	5	disrupted	5	disrupted	3	2	4	1	5	disrupted	truncated_at_c	1	disrupted	1
23QC0439	Goat	III	13	missing	1	14	disrupted	disrupted	1	8	disrupted	1	1	1	9	truncated_at_n	disrupted	2	truncated_at_n	2	1	4	disrupted	5	7	3	truncated_at_n	1	1	5	1	5	1	3	7	5	disrupted	5	disrupted	3	2	4	1	5	disrupted	truncated_at_c	1	disrupted	1
23QC0441	Sheep	II-a	13	missing	1	13	disrupted	9	4	4	disrupted	2	3	1	7	truncated_at_n	disrupted	3	truncated_at_n	2	1	disrupted	disrupted	13	7	5	truncated_at_n	1	1	5	1	5	1	3	8	4	disrupted	5	disrupted	3	4	truncated_at_n	1	disrupted	disrupted	12	1	disrupted	1
DRR179087	Cattle	I	disrupted	missing	disrupted	11	13	3	2	8	disrupted	1	1	2	8	truncated_at_n	disrupted	3	truncated_at_n	2	1	5	disrupted	10	6	6	truncated_at_n	1	1	5	1	5	1	2	11	6	disrupted	7	13	3	4	7	1	5	disrupted	11	1	disrupted	1
DRR179091	Human	I	disrupted	missing	disrupted	11	13	3	2	8	disrupted	1	1	2	8	truncated_at_n	disrupted	3	truncated_at_n	2	1	5	disrupted	10	6	6	truncated_at_n	1	1	5	1	5	1	2	11	6	disrupted	7	13	3	4	7	1	5	disrupted	11	1	disrupted	1
ERR436391	Cattle	III	13	missing	1	14	disrupted	disrupted	1	8	disrupted	1	1	1	9	truncated_at_n	disrupted	2	truncated_at_n	2	1	4	disrupted	5	7	3	truncated_at_n	1	1	5	1	5	1	3	7	5	disrupted	5	disrupted	3	2	4	1	5	disrupted	truncated_at_c	1	disrupted	1
ERR436392	Cattle	III	13	missing	1	14	disrupted	disrupted	6	8	disrupted	1	1	1	9	truncated_at_n	disrupted	2	truncated_at_n	2	1	4	disrupted	5	7	3	truncated_at_n	1	1	disrupted	1	5	1	3	7	5	disrupted	5	disrupted	3	2	4	1	5	disrupted	truncated_at_c	1	disrupted	1
ERR436395	Cattle	III	13	missing	1	14	disrupted	disrupted	1	8	disrupted	1	1	1	9	truncated_at_n	disrupted	2	truncated_at_n	2	1	4	disrupted	5	7	3	truncated_at_n	1	1	disrupted	1	5	1	3	7	5	disrupted	5	disrupted	3	2	4	1	5	disrupted	truncated_at_c	1	disrupted	1
ERR436396	Goat	II-b	truncated_at_n	missing	disrupted	15	disrupted	3	5	4	missing	missing	1	1	7	truncated_at_n	disrupted	3	truncated_at_n	2	1	4	disrupted	8	1	truncated_at_c	truncated_at_n	1	1	1	1	5	1	4	9	4	disrupted	1	disrupted	4	4	disrupted	1	5	disrupted	8	1	disrupted	1
GCF_000007765.2	Tick	I	disrupted	missing	disrupted	11	13	3	2	8	disrupted	1	1	2	8	truncated_at_n	disrupted	3	truncated_at_n	2	1	5	disrupted	12	6	6	truncated_at_n	1	1	5	1	5	1	2	11	4	disrupted	7	13	3	4	7	1	5	disrupted	11	1	disrupted	1
GCF_000017105.1	Rodent	VI	17	1	3	9	7	4	10	12	truncated_at_c	5	1	1	3	2	disrupted	3	2	2	4	14	disrupted	11	disrupted	12	truncated_at_c	2	1	2	1	7	3	8	2	7	disrupted	14	15	3	4	11	5	7	disrupted	16	1	disrupted	10
GCF_000019865.1	Human	V	disrupted	missing	disrupted	10	5	5	9	disrupted	missing	missing	1	1	1	missing	truncated_at_n	3	truncated_at_c	2	6	disrupted	disrupted	disrupted	disrupted	7	11	1	1	5	1	3	3	truncated_at_n	10	8	disrupted	11	12	3	6	truncated_at_c	6	6	disrupted	7	1	disrupted	truncated_at_n
GCF_000019885.1	Human	IV-a	disrupted	missing	2	6	4	8	8	disrupted	5	4	2	missing	1	truncated_at_c	disrupted	1	truncated_at_c	1	6	disrupted	disrupted	disrupted	disrupted	disrupted	disrupted	3	1	2	2	disrupted	3	6	4	3	disrupted	15	truncated_at_n	2	1	11	2	truncated_at_both	truncated_at_c	truncated_at_n	1	14	3
GCF_000168875.2	Goat	IV-a	disrupted	missing	2	6	4	8	8	disrupted	5	4	2	missing	1	truncated_at_c	disrupted	1	truncated_at_c	1	6	disrupted	disrupted	disrupted	disrupted	disrupted	disrupted	3	1	2	2	disrupted	3	6	4	3	disrupted	15	truncated_at_n	2	1	11	2	truncated_at_both	truncated_at_c	truncated_at_n	1	14	3
GCF_000169495.2	Human	IV-b	disrupted	missing	2	2	missing	7	8	disrupted	5	4	6	1	4	truncated_at_c	disrupted	3	3	1	truncated_at_n	truncated_at_c	disrupted	3	disrupted	disrupted	disrupted	missing	1	2	1	truncated_at_c	3	8	6	1	disrupted	12	truncated_at_n	1	5	11	2	truncated_at_both	truncated_at_c	3	1	14	8
GCF_000612785.1	Ruminants	I	disrupted	missing	disrupted	11	missing	3	2	8	disrupted	1	1	2	8	truncated_at_n	disrupted	3	truncated_at_n	2	1	5	disrupted	10	6	6	truncated_at_n	1	1	5	1	5	1	2	11	6	disrupted	7	13	3	4	7	1	5	disrupted	11	1	disrupted	1
GCF_000751935.1	Dog	V	disrupted	missing	disrupted	10	5	5	9	disrupted	missing	missing	1	1	1	missing	truncated_at_n	3	truncated_at_c	2	6	disrupted	disrupted	disrupted	disrupted	7	11	1	1	5	1	3	3	truncated_at_n	10	8	disrupted	11	12	3	6	truncated_at_c	6	6	disrupted	7	2	disrupted	truncated_at_n
GCF_000767035.1	Goat	Namibia	disrupted	missing	2	8	8	8	8	disrupted	missing	missing	1	1	1	truncated_at_c	7	1	5	1	6	truncated_at_c	disrupted	4	disrupted	disrupted	disrupted	disrupted	1	3	1	truncated_at_c	3	7	4	1	truncated_at_c	13	truncated_at_n	1	7	13	4	truncated_at_n	truncated_at_c	17	1	14	disrupted
GCF_000820465.1	Human	IV-b	disrupted	missing	2	2	disrupted	7	8	disrupted	5	4	4	1	4	truncated_at_c	disrupted	3	3	1	3	disrupted	disrupted	3	disrupted	disrupted	disrupted	3	1	2	1	truncated_at_c	3	8	1	1	disrupted	12	truncated_at_n	1	5	11	2	truncated_at_both	truncated_at_c	truncated_at_c	1	14	8
GCF_001572745.1	Goat	II-b	truncated_at_n	missing	disrupted	15	disrupted	3	5	4	missing	missing	1	1	7	truncated_at_n	disrupted	3	truncated_at_n	2	1	4	disrupted	8	1	truncated_at_c	truncated_at_n	1	1	1	1	5	1	4	9	4	disrupted	1	disrupted	truncated_at_n	4	disrupted	1	5	disrupted	8	1	disrupted	1
GCF_001572765.1	Human	II-b	truncated_at_n	missing	disrupted	16	disrupted	3	5	4	missing	missing	1	1	7	truncated_at_n	disrupted	3	truncated_at_n	2	1	4	disrupted	8	1	truncated_at_c	truncated_at_n	1	1	1	1	5	1	4	9	4	disrupted	1	disrupted	4	4	disrupted	1	5	disrupted	8	1	disrupted	1
GCF_002247185.1	Goat	III	13	missing	1	14	disrupted	disrupted	1	8	disrupted	1	1	1	9	truncated_at_n	disrupted	2	truncated_at_n	2	1	4	disrupted	5	7	3	truncated_at_n	1	1	5	1	5	1	3	7	5	disrupted	5	disrupted	3	2	4	1	5	disrupted	truncated_at_c	1	disrupted	1
GCF_002247205.1	Human	I	disrupted	missing	disrupted	11	13	3	2	8	disrupted	1	1	2	8	truncated_at_n	disrupted	3	truncated_at_n	2	1	5	disrupted	10	6	6	truncated_at_n	1	1	5	1	5	1	2	11	6	disrupted	7	13	3	4	7	1	5	disrupted	11	1	disrupted	1
GCF_002247265.1	Human	I	disrupted	missing	disrupted	11	13	3	2	8	disrupted	1	1	2	8	truncated_at_n	disrupted	3	truncated_at_n	2	1	5	disrupted	10	6	6	truncated_at_n	1	1	5	1	5	1	2	11	4	disrupted	7	13	3	4	7	1	5	disrupted	11	1	disrupted	1
GCF_002247285.1	Cattle	I	disrupted	missing	disrupted	11	13	3	2	8	disrupted	1	1	2	8	truncated_at_n	disrupted	3	truncated_at_n	2	1	5	disrupted	10	6	6	truncated_at_n	1	1	5	1	5	1	2	11	4	disrupted	7	13	3	4	7	1	5	disrupted	11	1	disrupted	1
GCF_002247335.1	Cattle	I	disrupted	missing	disrupted	11	13	3	2	8	disrupted	1	1	2	8	truncated_at_n	disrupted	3	truncated_at_n	2	1	5	disrupted	10	6	6	truncated_at_n	1	1	5	1	5	1	2	11	4	disrupted	7	13	3	4	7	1	5	disrupted	11	1	disrupted	1
GCF_002247545.1	Rodent	VI	17	1	3	9	7	4	10	13	truncated_at_c	5	1	1	3	2	disrupted	3	2	2	4	14	disrupted	11	disrupted	12	truncated_at_c	2	1	2	1	7	3	8	2	7	disrupted	14	15	3	4	11	5	7	disrupted	16	1	disrupted	10
GCF_002249845.1	Cattle	I	disrupted	missing	disrupted	11	13	3	2	8	disrupted	1	1	2	8	truncated_at_n	disrupted	3	truncated_at_n	2	1	5	disrupted	10	6	6	truncated_at_n	1	1	5	1	5	1	2	11	4	disrupted	7	13	3	4	7	1	5	disrupted	11	1	disrupted	1
GCF_002633885.1	Human	V	disrupted	missing	disrupted	10	5	5	9	disrupted	missing	missing	1	1	1	missing	truncated_at_n	3	truncated_at_c	2	6	disrupted	disrupted	disrupted	disrupted	7	11	1	1	5	1	3	3	truncated_at_n	10	8	disrupted	11	12	3	6	truncated_at_c	6	6	disrupted	7	2	disrupted	truncated_at_n
GCF_002633905.1	Human	II-b	truncated_at_n	missing	disrupted	15	disrupted	3	5	4	missing	missing	1	1	7	truncated_at_n	disrupted	3	truncated_at_n	2	1	4	disrupted	8	1	truncated_at_c	truncated_at_n	1	1	1	1	5	1	4	9	4	disrupted	1	disrupted	4	4	disrupted	1	5	disrupted	8	1	disrupted	1
GCF_002633925.1	Goat	II-b	truncated_at_n	missing	disrupted	16	disrupted	3	5	4	missing	missing	1	1	7	truncated_at_n	disrupted	3	truncated_at_n	2	1	4	disrupted	8	1	truncated_at_c	truncated_at_n	1	1	1	1	5	1	4	9	4	disrupted	1	disrupted	4	4	disrupted	1	5	disrupted	8	1	disrupted	1
GCF_002633945.1	Goat	III	13	missing	1	14	disrupted	disrupted	1	8	disrupted	1	1	1	9	truncated_at_n	disrupted	2	truncated_at_n	2	1	4	disrupted	5	7	3	truncated_at_n	1	1	5	1	5	1	3	7	5	disrupted	5	disrupted	3	2	4	1	5	disrupted	truncated_at_c	1	disrupted	1
GCF_002633965.1	Cattle	III	13	missing	1	14	disrupted	disrupted	1	8	disrupted	1	1	1	9	truncated_at_n	disrupted	2	truncated_at_n	2	1	4	disrupted	5	7	3	truncated_at_n	1	1	5	1	5	1	3	7	5	disrupted	5	disrupted	3	2	4	1	5	disrupted	truncated_at_c	1	disrupted	1
GCF_002633985.1	Cattle	III	13	missing	1	14	disrupted	disrupted	1	8	disrupted	1	1	1	9	truncated_at_n	disrupted	2	truncated_at_n	2	1	4	disrupted	5	7	3	truncated_at_n	1	1	5	1	5	1	3	7	5	disrupted	5	disrupted	3	2	4	1	5	disrupted	truncated_at_c	1	disrupted	1
GCF_002634005.1	Sheep	III	13	missing	1	14	disrupted	disrupted	1	8	disrupted	1	1	1	9	truncated_at_n	disrupted	2	truncated_at_n	2	1	4	disrupted	5	7	3	truncated_at_n	1	1	5	1	5	1	3	7	5	disrupted	5	disrupted	3	2	4	1	5	disrupted	truncated_at_c	1	disrupted	1
GCF_002634025.1	Human	II-a	13	missing	1	12	disrupted	3	4	4	disrupted	2	3	1	7	truncated_at_n	disrupted	3	truncated_at_n	2	1	disrupted	disrupted	13	7	5	truncated_at_n	1	1	5	1	5	1	3	8	4	disrupted	3	disrupted	3	4	truncated_at_n	1	disrupted	disrupted	12	1	disrupted	1
GCF_002634045.1	Human	II-a	13	missing	1	12	disrupted	3	4	4	disrupted	2	3	1	7	truncated_at_n	disrupted	3	truncated_at_n	2	1	disrupted	disrupted	13	7	5	truncated_at_n	1	1	5	1	5	4	3	8	4	disrupted	5	disrupted	3	4	truncated_at_n	1	disrupted	disrupted	12	1	disrupted	1
GCF_002634065.1	Human	IV-b	disrupted	missing	2	2	disrupted	7	8	disrupted	5	7	6	1	4	truncated_at_c	disrupted	3	3	1	3	truncated_at_c	disrupted	3	disrupted	disrupted	disrupted	3	1	2	1	truncated_at_c	3	8	1	1	disrupted	12	truncated_at_n	1	5	11	2	truncated_at_both	truncated_at_c	2	1	14	8
GCF_002634085.1	Goat	II-b	truncated_at_n	missing	disrupted	15	disrupted	3	5	4	missing	missing	1	1	7	truncated_at_n	disrupted	3	truncated_at_n	2	1	4	disrupted	8	1	truncated_at_c	truncated_at_n	1	1	1	1	5	1	4	9	4	disrupted	1	disrupted	4	4	disrupted	1	5	disrupted	missing	1	disrupted	1
GCF_002896735.1	Cattle	III	13	missing	1	14	disrupted	disrupted	1	8	disrupted	1	1	1	9	truncated_at_n	disrupted	2	truncated_at_n	2	1	4	disrupted	5	7	3	truncated_at_n	1	1	5	1	5	1	3	7	5	disrupted	5	disrupted	3	2	4	1	5	disrupted	truncated_at_c	1	disrupted	1
GCF_002896755.1	Cattle	III	13	missing	1	14	disrupted	disrupted	1	8	disrupted	1	1	4	9	truncated_at_n	disrupted	2	truncated_at_n	2	1	4	disrupted	5	7	3	truncated_at_n	1	1	5	1	5	1	3	7	5	disrupted	5	disrupted	3	2	4	1	5	disrupted	truncated_at_c	1	disrupted	1
GCF_002896775.1	Cattle	III	13	missing	1	14	disrupted	disrupted	1	8	disrupted	1	1	1	9	truncated_at_n	disrupted	2	truncated_at_n	2	1	4	disrupted	5	7	3	truncated_at_n	1	1	5	1	5	1	3	7	5	disrupted	5	disrupted	3	2	4	1	5	disrupted	truncated_at_c	1	disrupted	1
GCF_002896835.1	Sheep	III	13	missing	1	14	disrupted	disrupted	1	8	disrupted	1	1	1	9	truncated_at_n	disrupted	2	truncated_at_n	2	1	4	disrupted	5	7	3	truncated_at_n	1	1	5	1	5	1	3	7	5	disrupted	6	disrupted	3	2	4	1	5	disrupted	truncated_at_c	1	disrupted	1
GCF_003849965.1	Cattle	III	13	missing	1	14	disrupted	disrupted	1	8	disrupted	1	1	1	9	truncated_at_n	disrupted	2	truncated_at_n	2	1	4	disrupted	5	7	3	truncated_at_n	1	1	5	1	5	1	3	7	5	disrupted	5	disrupted	3	2	4	1	5	disrupted	truncated_at_c	1	disrupted	1
GCF_024918495.1	Human	II-c	truncated_at_n	missing	1	15	disrupted	3	5	4	missing	missing	1	1	7	truncated_at_n	disrupted	3	truncated_at_n	2	1	4	disrupted	8	3	truncated_at_c	truncated_at_n	1	1	1	1	5	1	4	9	4	disrupted	1	disrupted	4	4	8	1	5	disrupted	8	1	disrupted	1
GCF_024918535.1	Human	II-b	truncated_at_n	missing	1	15	disrupted	3	5	4	missing	missing	1	1	7	truncated_at_n	disrupted	3	truncated_at_n	2	1	4	disrupted	8	1	truncated_at_c	truncated_at_n	1	1	1	1	5	1	4	9	4	disrupted	1	disrupted	4	4	10	1	5	disrupted	8	1	disrupted	1
GCF_024918555.1	Mouse	IV-a	disrupted	missing	2	7	4	8	8	disrupted	5	4	5	1	1	truncated_at_both	disrupted	1	truncated_at_c	1	6	disrupted	disrupted	disrupted	disrupted	disrupted	disrupted	3	1	2	2	disrupted	3	6	4	3	disrupted	truncated_at_n	truncated_at_n	2	1	11	truncated_at_n	truncated_at_both	truncated_at_c	missing	1	14	7
GCF_024918575.1	Human	IV-a	disrupted	missing	2	4	4	8	8	disrupted	5	4	2	1	1	truncated_at_c	disrupted	1	truncated_at_c	1	6	disrupted	30	disrupted	disrupted	disrupted	disrupted	3	1	2	2	truncated_at_c	3	6	4	1	disrupted	15	truncated_at_n	2	1	11	2	truncated_at_n	truncated_at_c	missing	1	14	3
GCF_024918595.1	Human	II-c	truncated_at_n	missing	disrupted	15	disrupted	3	5	15	missing	missing	1	1	7	truncated_at_n	disrupted	3	truncated_at_n	2	1	4	disrupted	8	disrupted	truncated_at_c	truncated_at_n	1	1	1	1	5	1	3	9	4	disrupted	1	disrupted	4	4	9	1	5	disrupted	8	1	disrupted	1
GCF_024918615.1	Human	II-c	truncated_at_n	missing	1	15	disrupted	3	5	4	missing	missing	1	1	7	truncated_at_n	disrupted	3	truncated_at_n	2	1	4	disrupted	8	3	truncated_at_c	truncated_at_n	1	1	1	1	5	1	4	9	4	disrupted	1	disrupted	4	4	8	1	5	disrupted	8	1	disrupted	11
GCF_024918635.1	Human	I	disrupted	missing	disrupted	11	13	3	2	8	disrupted	1	1	2	8	truncated_at_n	disrupted	4	truncated_at_n	2	1	5	disrupted	10	6	6	truncated_at_n	1	1	5	1	5	1	2	11	4	disrupted	7	13	3	4	7	1	5	disrupted	11	1	disrupted	1
GCF_024918655.1	Tick	IV-b	disrupted	missing	2	1	6	8	disrupted	disrupted	5	4	1	1	4	truncated_at_c	7	3	3	1	5	truncated_at_c	disrupted	3	disrupted	disrupted	disrupted	3	1	2	1	truncated_at_c	3	8	1	2	disrupted	truncated_at_n	truncated_at_n	1	5	11	2	truncated_at_n	truncated_at_c	missing	1	14	6
GCF_024918675.1	Human	IV-a	disrupted	missing	2	6	4	8	8	disrupted	5	4	5	1	1	truncated_at_c	disrupted	1	truncated_at_c	1	6	truncated_at_c	disrupted	disrupted	disrupted	disrupted	disrupted	3	1	2	2	disrupted	3	6	4	3	disrupted	truncated_at_n	truncated_at_n	2	1	11	2	truncated_at_both	truncated_at_c	missing	1	14	3
GCF_024918695.1	Human	II-a	13	missing	1	13	17	3	4	4	disrupted	2	3	1	7	truncated_at_n	disrupted	3	truncated_at_n	2	1	disrupted	disrupted	truncated_at_n	7	5	truncated_at_n	1	1	5	1	5	1	5	8	4	disrupted	5	disrupted	5	4	truncated_at_n	1	5	19	12	1	disrupted	1
GCF_025989895.1	Goat	II-c	truncated_at_n	missing	disrupted	15	disrupted	3	5	4	missing	missing	1	1	7	truncated_at_n	disrupted	3	truncated_at_n	2	2	4	disrupted	8	2	truncated_at_c	truncated_at_n	1	1	1	1	5	disrupted	4	9	4	disrupted	2	disrupted	truncated_at_n	4	disrupted	1	5	disrupted	8	1	disrupted	1
GCF_025989925.1	Human	IV-a	disrupted	missing	2	6	4	8	8	disrupted	5	4	2	missing	1	truncated_at_c	disrupted	1	truncated_at_c	1	6	disrupted	disrupted	disrupted	disrupted	disrupted	disrupted	3	1	2	2	disrupted	3	6	4	3	disrupted	15	truncated_at_n	2	1	11	2	truncated_at_both	truncated_at_c	truncated_at_n	1	14	3
GCF_025989955.1	Human	V	disrupted	missing	disrupted	10	5	5	9	disrupted	missing	missing	1	1	1	missing	truncated_at_n	3	truncated_at_c	2	6	disrupted	disrupted	disrupted	disrupted	7	11	1	1	5	1	3	3	truncated_at_n	10	8	disrupted	11	12	3	6	truncated_at_c	6	6	disrupted	7	1	disrupted	truncated_at_n
GCF_025990005.1	Human	II-b	truncated_at_n	missing	disrupted	15	disrupted	3	5	4	missing	missing	1	1	7	missing	disrupted	3	truncated_at_n	2	1	4	disrupted	8	1	truncated_at_c	truncated_at_n	1	1	1	1	5	1	4	9	4	disrupted	1	disrupted	4	4	disrupted	1	5	disrupted	8	1	disrupted	1
GCF_025990095.1	Human	II-c	truncated_at_n	missing	disrupted	15	disrupted	3	5	4	missing	missing	1	1	7	truncated_at_n	disrupted	3	truncated_at_n	2	1	4	disrupted	8	4	truncated_at_c	truncated_at_n	1	1	1	1	5	1	4	9	4	disrupted	1	disrupted	truncated_at_n	4	disrupted	1	5	disrupted	8	1	disrupted	1
GCF_025990275.1	Tick	I	disrupted	missing	disrupted	11	13	3	2	8	disrupted	1	1	2	8	truncated_at_n	disrupted	3	truncated_at_n	2	1	5	disrupted	12	6	9	truncated_at_n	1	1	5	1	5	1	2	11	4	disrupted	7	13	3	4	7	1	5	disrupted	11	1	disrupted	1
GCF_025990295.1	Human	III	13	missing	1	14	disrupted	disrupted	1	8	disrupted	1	1	1	9	truncated_at_n	disrupted	2	truncated_at_n	2	1	4	disrupted	5	disrupted	3	truncated_at_n	1	1	5	1	5	5	3	7	5	disrupted	5	disrupted	3	2	4	1	5	disrupted	truncated_at_c	1	disrupted	1
GCF_025990315.1	Human	II-c	truncated_at_n	missing	disrupted	15	disrupted	3	5	4	missing	missing	1	missing	7	truncated_at_n	disrupted	3	truncated_at_n	2	1	4	disrupted	8	4	truncated_at_c	truncated_at_n	1	1	1	1	5	1	4	9	4	disrupted	1	disrupted	truncated_at_n	4	disrupted	1	5	disrupted	8	1	disrupted	1
GCF_025990355.1	Human	II-b	truncated_at_n	missing	disrupted	15	disrupted	3	5	4	missing	missing	1	1	7	truncated_at_n	disrupted	3	truncated_at_n	2	1	4	disrupted	8	1	truncated_at_c	truncated_at_n	1	1	1	1	5	1	4	9	4	disrupted	1	disrupted	truncated_at_n	4	disrupted	1	5	disrupted	8	1	disrupted	1
GCF_025990375.1	Human	II-c	truncated_at_n	missing	disrupted	15	disrupted	3	5	4	missing	missing	1	1	7	truncated_at_n	disrupted	3	truncated_at_n	2	1	4	disrupted	8	2	truncated_at_c	truncated_at_n	1	1	1	1	5	1	4	9	4	disrupted	1	disrupted	4	4	disrupted	1	5	disrupted	8	1	disrupted	1
GCF_025990395.1	Human	III	13	missing	1	14	disrupted	disrupted	1	8	disrupted	1	1	1	9	truncated_at_n	disrupted	2	truncated_at_n	2	1	4	disrupted	5	7	3	truncated_at_n	1	1	5	1	5	1	3	7	5	disrupted	5	disrupted	3	2	4	1	5	disrupted	truncated_at_c	1	disrupted	1
GCF_025990455.1	Human	I	disrupted	missing	disrupted	11	13	3	2	8	disrupted	1	1	2	8	truncated_at_n	disrupted	3	truncated_at_n	2	1	5	disrupted	12	6	9	truncated_at_n	1	1	5	1	5	1	2	11	4	disrupted	7	13	3	4	7	1	5	disrupted	11	1	disrupted	1
GCF_025990495.1	Human	IV-b	disrupted	missing	2	1	6	8	8	disrupted	5	4	1	1	4	truncated_at_c	disrupted	3	3	1	5	truncated_at_c	disrupted	3	disrupted	disrupted	disrupted	3	1	2	1	truncated_at_c	3	8	1	2	disrupted	16	truncated_at_n	1	5	11	2	truncated_at_n	truncated_at_c	4	1	14	8
GCF_025990535.1	Human	IV-b	disrupted	missing	2	2	disrupted	7	8	disrupted	missing	missing	6	1	4	truncated_at_c	disrupted	3	3	1	3	truncated_at_c	disrupted	3	disrupted	disrupted	disrupted	3	1	2	1	truncated_at_c	3	8	1	1	disrupted	12	truncated_at_n	1	5	11	2	truncated_at_both	truncated_at_c	1	1	14	truncated_at_n
GCF_025990565.1	Human	IV-b	disrupted	missing	2	2	disrupted	7	8	disrupted	5	4	4	1	4	truncated_at_c	disrupted	3	3	1	3	disrupted	disrupted	3	disrupted	disrupted	disrupted	3	1	2	1	truncated_at_c	3	8	1	1	disrupted	12	truncated_at_n	1	5	disrupted	2	truncated_at_both	truncated_at_c	2	1	14	8
GCF_025990595.1	Human	IV-a	disrupted	missing	2	6	4	8	8	disrupted	5	4	2	missing	1	truncated_at_c	disrupted	1	truncated_at_c	1	6	disrupted	disrupted	disrupted	disrupted	disrupted	disrupted	3	1	2	2	disrupted	3	6	4	3	disrupted	15	truncated_at_n	2	1	11	2	truncated_at_both	truncated_at_c	truncated_at_n	1	14	3
GCF_025990615.1	Human	IV-a	disrupted	missing	2	6	4	8	8	disrupted	5	4	2	missing	1	truncated_at_c	disrupted	1	truncated_at_c	1	6	disrupted	disrupted	disrupted	disrupted	disrupted	disrupted	3	1	2	2	disrupted	3	6	4	3	disrupted	15	truncated_at_n	2	1	11	2	truncated_at_both	truncated_at_c	truncated_at_n	1	14	3
GCF_025990695.1	Human	IV-a	disrupted	missing	2	6	4	8	8	disrupted	5	4	2	missing	1	truncated_at_c	disrupted	1	truncated_at_c	1	6	disrupted	disrupted	disrupted	disrupted	disrupted	disrupted	3	1	2	2	disrupted	3	6	4	3	disrupted	15	truncated_at_n	2	1	11	2	truncated_at_both	truncated_at_c	truncated_at_n	1	14	3
GCF_025990715.1	Human	IV-b	disrupted	missing	2	2	disrupted	7	8	disrupted	5	4	4	1	4	truncated_at_c	disrupted	3	3	1	3	disrupted	disrupted	3	disrupted	disrupted	disrupted	3	1	2	1	truncated_at_c	3	8	1	1	disrupted	12	truncated_at_n	1	5	disrupted	2	truncated_at_both	truncated_at_c	2	1	14	8
GCF_025990755.1	Tick	I	disrupted	missing	disrupted	11	13	3	2	8	disrupted	1	1	2	8	truncated_at_n	disrupted	3	truncated_at_n	2	1	5	disrupted	12	6	10	truncated_at_n	1	1	5	1	5	1	2	11	4	disrupted	7	13	3	4	7	1	5	disrupted	11	1	disrupted	1
GCF_025990765.1	Human	II-c	truncated_at_n	missing	disrupted	15	disrupted	3	5	4	missing	missing	1	1	7	truncated_at_n	disrupted	3	truncated_at_n	2	1	4	disrupted	8	2	truncated_at_c	truncated_at_n	1	1	1	1	5	1	4	9	4	disrupted	1	disrupted	4	4	disrupted	1	5	disrupted	9	1	disrupted	1
GCF_025990795.1	Human	IV-a	disrupted	missing	2	6	4	8	8	disrupted	5	4	2	missing	1	truncated_at_c	disrupted	1	truncated_at_c	1	6	disrupted	disrupted	disrupted	disrupted	disrupted	disrupted	3	1	2	2	disrupted	3	6	4	3	disrupted	15	disrupted	2	1	11	2	truncated_at_both	disrupted	truncated_at_n	1	14	3
GCF_025990815.1	Human	I-III-like	13	missing	truncated_at_c	17	disrupted	3	1	8	disrupted	1	1	1	8	truncated_at_n	disrupted	3	truncated_at_n	2	1	truncated_at_c	disrupted	9	7	3	truncated_at_n	1	1	5	1	5	1	3	11	4	disrupted	4	13	3	4	7	1	5	19	12	1	disrupted	1
GCF_025990835.1	Human	IV-a	disrupted	missing	2	6	4	8	8	disrupted	5	4	2	missing	1	truncated_at_c	disrupted	1	truncated_at_c	1	6	disrupted	disrupted	disrupted	disrupted	disrupted	disrupted	3	1	2	2	disrupted	3	6	3	3	disrupted	15	disrupted	2	1	11	2	truncated_at_both	disrupted	truncated_at_n	1	14	3
GCF_025990855.1	Human	IV-b	disrupted	missing	2	5	6	8	8	disrupted	missing	missing	1	1	4	truncated_at_c	disrupted	3	3	1	6	truncated_at_c	disrupted	3	disrupted	disrupted	disrupted	3	1	2	1	truncated_at_c	7	8	1	1	disrupted	16	truncated_at_n	1	5	11	2	8	truncated_at_c	4	1	14	4
GCF_025990865.1	Human	IV-b	disrupted	missing	2	2	disrupted	7	8	disrupted	missing	missing	6	1	4	truncated_at_c	disrupted	3	3	1	3	truncated_at_c	disrupted	3	disrupted	disrupted	disrupted	3	1	2	1	truncated_at_c	3	8	1	1	disrupted	12	truncated_at_n	1	5	11	2	truncated_at_both	truncated_at_c	1	1	14	truncated_at_n
GCF_025990895.1	Human	IV-b	disrupted	missing	2	2	disrupted	7	8	disrupted	missing	missing	6	1	4	truncated_at_c	disrupted	3	3	1	3	truncated_at_c	disrupted	3	disrupted	disrupted	disrupted	3	1	2	1	truncated_at_c	3	8	1	1	disrupted	12	truncated_at_n	1	5	11	2	truncated_at_both	truncated_at_c	1	1	14	truncated_at_n
GCF_027627535.1	Human	I	disrupted	missing	disrupted	11	13	3	2	8	disrupted	1	1	2	8	truncated_at_n	disrupted	3	truncated_at_n	2	1	5	disrupted	10	6	6	truncated_at_n	1	1	5	1	5	1	2	11	4	disrupted	7	13	3	4	7	1	5	disrupted	11	1	disrupted	1
GCF_027943585.1	Human	III	13	missing	1	18	disrupted	disrupted	1	8	disrupted	1	1	1	9	truncated_at_n	disrupted	2	truncated_at_n	2	1	4	disrupted	5	7	3	truncated_at_n	1	1	5	1	5	1	3	7	5	disrupted	5	disrupted	3	2	4	1	5	disrupted	truncated_at_c	1	disrupted	1
GCF_027943605.1	Human	I	disrupted	missing	disrupted	11	13	3	2	8	disrupted	1	1	2	8	truncated_at_n	disrupted	3	truncated_at_n	2	1	5	disrupted	10	6	6	truncated_at_n	1	1	5	1	5	1	2	11	6	disrupted	7	13	3	4	7	1	5	disrupted	11	1	disrupted	1
GCF_032463305.1	Human	IV-b	disrupted	missing	2	1	6	8	8	disrupted	missing	missing	1	1	4	truncated_at_c	disrupted	3	3	1	6	truncated_at_c	disrupted	3	disrupted	disrupted	disrupted	3	1	2	1	truncated_at_c	3	disrupted	5	1	disrupted	16	truncated_at_n	1	5	11	2	8	truncated_at_c	truncated_at_n	1	14	4
SRR12935076	Goat	III	13	missing	1	14	disrupted	disrupted	1	8	disrupted	1	1	1	9	truncated_at_n	disrupted	2	truncated_at_n	2	1	4	disrupted	5	7	3	truncated_at_n	1	1	5	1	5	1	3	7	5	disrupted	5	disrupted	3	2	4	1	5	disrupted	truncated_at_c	1	disrupted	1
SRR12935077	Cattle	III	13	missing	1	14	disrupted	disrupted	1	8	disrupted	1	1	missing	9	truncated_at_n	disrupted	2	truncated_at_n	2	1	4	disrupted	5	7	3	truncated_at_n	1	1	5	1	5	1	3	7	5	disrupted	5	disrupted	3	2	4	1	5	disrupted	truncated_at_c	1	disrupted	1
SRR12935078	Cattle	III	13	missing	1	14	disrupted	disrupted	1	8	disrupted	1	1	1	9	truncated_at_n	disrupted	2	truncated_at_n	2	1	4	disrupted	5	7	3	truncated_at_n	1	1	5	1	5	1	3	7	5	disrupted	5	disrupted	3	2	4	1	5	disrupted	truncated_at_c	1	disrupted	1
SRR22439204	Human	IV-a	disrupted	missing	2	3	3	8	7	disrupted	truncated_at_n	4	2	missing	1	truncated_at_c	disrupted	1	truncated_at_c	1	6	disrupted	disrupted	disrupted	disrupted	disrupted	disrupted	3	1	2	2	disrupted	3	6	3	1	disrupted	15	truncated_at_n	2	1	11	2	truncated_at_both	truncated_at_c	truncated_at_n	1	14	3
SRR22439205	Human	IV-a	disrupted	missing	2	3	3	8	7	disrupted	truncated_at_n	4	2	missing	1	truncated_at_c	disrupted	3	truncated_at_c	1	6	disrupted	disrupted	disrupted	disrupted	disrupted	disrupted	3	1	2	2	disrupted	3	6	11	1	disrupted	15	truncated_at_n	2	1	11	2	truncated_at_both	truncated_at_c	truncated_at_n	1	14	3
SRR26633117	Tick	I	disrupted	missing	disrupted	11	13	3	2	8	disrupted	1	1	2	8	truncated_at_n	disrupted	3	truncated_at_n	2	1	5	disrupted	10	6	6	truncated_at_n	1	1	5	1	5	1	2	11	6	disrupted	7	13	3	4	7	1	5	disrupted	11	1	disrupted	1
SRR3347474	Soil	III	13	missing	1	14	disrupted	disrupted	1	8	disrupted	1	1	1	9	truncated_at_n	disrupted	2	truncated_at_n	2	1	4	disrupted	5	7	3	truncated_at_n	1	1	5	1	5	1	3	7	5	disrupted	5	disrupted	3	2	4	1	5	disrupted	truncated_at_c	1	disrupted	1
SRR405074	Human	I	disrupted	missing	disrupted	11	13	3	3	8	disrupted	1	1	2	8	truncated_at_n	disrupted	3	truncated_at_n	2	1	5	disrupted	10	6	6	truncated_at_n	1	1	5	1	5	1	2	11	4	disrupted	7	13	3	4	7	1	5	disrupted	11	1	disrupted	1
SRR405075	Human	V	disrupted	missing	disrupted	10	5	5	9	disrupted	missing	missing	1	1	5	missing	truncated_at_n	3	truncated_at_c	2	6	disrupted	disrupted	disrupted	disrupted	7	11	1	1	5	1	3	3	truncated_at_n	10	8	disrupted	11	12	3	6	truncated_at_c	6	6	disrupted	7	1	disrupted	truncated_at_n
SRR6300869	Human	I	disrupted	missing	disrupted	11	13	3	3	8	disrupted	1	1	2	8	truncated_at_n	disrupted	3	truncated_at_n	2	1	5	disrupted	10	6	6	truncated_at_n	1	1	5	1	5	1	2	11	4	disrupted	7	13	3	4	7	1	5	disrupted	11	1	disrupted	1
SRR6300871	Human	II-a	13	missing	1	13	disrupted	3	4	4	disrupted	2	3	1	7	truncated_at_n	disrupted	3	truncated_at_n	2	1	disrupted	disrupted	13	7	5	truncated_at_n	1	1	5	1	5	1	3	8	4	disrupted	5	disrupted	3	4	truncated_at_n	1	disrupted	disrupted	12	1	disrupted	12
SRR6300872	Tick	I	disrupted	missing	disrupted	11	13	3	2	8	disrupted	1	1	2	8	truncated_at_n	disrupted	3	truncated_at_n	2	1	5	disrupted	10	6	6	truncated_at_n	1	1	5	1	5	1	2	11	6	disrupted	7	13	3	4	7	1	5	disrupted	11	1	disrupted	1
SRR6300873	Human	I	disrupted	missing	disrupted	11	13	3	3	8	disrupted	1	1	2	8	truncated_at_n	disrupted	3	truncated_at_n	2	1	5	disrupted	10	6	6	truncated_at_n	1	1	5	1	5	1	2	11	4	disrupted	7	13	3	4	7	1	5	disrupted	11	1	disrupted	1
SRR6300874	Cattle	I	disrupted	missing	disrupted	11	13	3	2	8	disrupted	1	1	2	8	truncated_at_n	disrupted	3	truncated_at_n	2	1	5	disrupted	10	6	6	truncated_at_n	1	1	5	1	5	1	2	11	4	disrupted	7	13	3	4	7	1	5	disrupted	11	1	disrupted	1
SRR6300875	Rodent	VI	17	1	3	9	7	4	10	8	truncated_at_c	6	1	1	6	2	disrupted	3	2	2	4	14	31	11	disrupted	12	truncated_at_c	2	1	2	1	7	3	8	2	7	disrupted	17	15	3	4	11	5	7	disrupted	16	1	disrupted	10
SRR6479428	Human	NA	16	missing	disrupted	20	disrupted	disrupted	1	disrupted	disrupted	3	1	1	2	truncated_at_n	disrupted	2	truncated_at_n	3	1	5	disrupted	disrupted	disrupted	11	truncated_at_n	1	1	4	3	disrupted	1	3	7	4	truncated_at_n	disrupted	disrupted	3	4	disrupted	1	9	disrupted	13	3	disrupted	1
SRR6479430	Goat	II-b	truncated_at_n	missing	disrupted	15	disrupted	3	5	4	missing	missing	1	1	7	truncated_at_n	disrupted	3	truncated_at_n	2	1	4	disrupted	8	1	truncated_at_c	truncated_at_n	1	1	1	1	5	1	4	9	4	disrupted	1	disrupted	4	4	disrupted	1	5	disrupted	10	1	disrupted	1
SRR8234304	Goat	II-c	truncated_at_n	missing	disrupted	15	disrupted	3	5	4	missing	missing	1	1	7	truncated_at_n	disrupted	3	truncated_at_n	2	1	4	disrupted	8	2	truncated_at_c	truncated_at_n	1	1	1	1	5	1	4	9	4	disrupted	1	disrupted	4	4	disrupted	1	5	disrupted	8	1	disrupted	1
SRR8234306	Goat	II-b	truncated_at_n	missing	disrupted	15	disrupted	3	5	4	missing	missing	1	1	7	truncated_at_n	disrupted	3	truncated_at_n	2	1	4	disrupted	8	1	truncated_at_c	truncated_at_n	1	1	1	1	5	1	4	9	4	disrupted	1	disrupted	4	4	disrupted	1	5	disrupted	8	1	disrupted	1
SRR8234307	Goat	II-b	truncated_at_n	missing	disrupted	15	disrupted	3	5	4	missing	missing	1	1	7	truncated_at_n	disrupted	3	truncated_at_n	2	1	4	disrupted	8	1	truncated_at_c	truncated_at_n	1	1	1	1	5	1	4	9	4	disrupted	1	disrupted	4	4	disrupted	1	5	disrupted	8	1	disrupted	1
[truncated: 110 more columns]
