# Supplementary material for: Genome characteristics and type IV effector protein repertoire of Coxiella burnetii depend rather on Genomic Groups than on host species
Source: BMC Microbiol. 2026 Apr 22;26:393. doi: 10.1186/s12866-026-04897-w (PMC13104383; doi:10.1186/s12866-026-04897-w)
Supplement: Supplementary file 10 — Additional file 10: Table S7. Unique effector protein variant per Genomic Group. Unique sequence variants of effector proteins per Genomic Group. The designation of the proteins is according to the proteins’ similarity to reference strain Nine Mile I (GCF_000007765.2) effectors. [file 12866_2026_4897_MOESM10_ESM.xlsx]

## Sheet: Tabelle2
Genomic Group	I	II-a	II-b	II-c	III	I-III-like	IV-a	IV-b (including strain Namibia)	IV-b (excluding strain Namibia)	Strain Namibia	V	VI
	Unique effector variant	Unique effector variant	Unique effector variant	Unique effector variant	Unique effector variant	Unique effector variant	Unique effector variant	Unique effector variant	Unique effector variant	Unique effector variant	Unique effector variant	Unique effector variant
	CBU_0021	CBU_0049	CBU_0388	CBU_1677	CBU_0122	CBU_0012	CBU_0505	CBU_0637	CBU_0122	CBU_0021	CBU_0021	CBU_0012
	CBU_0113	CBU_0072	CBU_1677	CBU_1686	CBU_0372	CBU_0021	CBU_0534	CBU_1370	CBU_0183	CBU_0041	CBU_0041	CBU_0021
	CBU_0388	CBU_0077	CBU_1686		CBU_0547	CBU_0372	CBU_0637	CBU_1789	CBU_0372	CBU_0183	CBU_0048	CBU_0041
	CBU_0534	CBU_0542			CBU_0665	CBU_0626	CBU_0649		CBU_0649	CBU_0372	CBU_0049	CBU_0048
	CBU_0626	CBU_0665			CBU_0886	CBU_0978	CBU_0885		CBU_0885	CBU_0447	CBU_0144	CBU_0049
	CBU_0794	CBU_1387			CBU_0937	CBU_1457	CBU_1349		CBU_1253	CBU_0487	CBU_0410	CBU_0069
	CBU_0885	CBU_1485			CBU_1370	CBU_1460	CBU_1370		CBUD_0997	CBU_0534	CBU_0425	CBU_0128
	CBU_1370	CBU_1639			CBU_1425	CBU_1556	CBU_1607			CBU_0626	CBU_0513	CBU_0183
	CBU_1460	CBU_1819			CBU_1457	CBU_1576	CBU_1724			CBU_0649	CBU_0534	CBU_0270
	CBU_1493	CBU_1823			CBU_1556	CBU_1639	CBU_1789			CBU_0665	CBU_0542	CBU_0295
	CBU_1530	CBU_2078			CBU_1751	CBU_1685	CBU_1794			CBU_0773	CBU_0547	CBU_0372
	CBU_1569	CbuG_1711			CBU_1752	CBU_1699	CBUD_2063			CBU_0794	CBU_0626	CBU_0410
	CBU_1685				CBU_1818	CBU_1751				CBU_0822	CBU_0635	CBU_0425
	CBU_1686				CBU_2007	CBU_1752				CBU_0885	CBU_0649	CBU_0447
	CBU_1724				CBUA0006	CBU_1818				CBU_0937	CBU_0665	CBU_0513
	CBU_1751				CBUA0016	CBU_2007				CBU_0978	CBU_0773	CBU_0542
	CBU_1752					CBU_2078				CBU_1063	CBU_0781	CBU_0547
	CBU_1790					CBUD_0454				CBU_1213	CBU_0794	CBU_0635
	CBU_1818					CbuK_1976				CBU_1314	CBU_0886	CBU_0773
	CBU_1863									CBU_1349	CBU_0937	CBU_0781
	CBU_2013									CBU_1406-9	CBU_0978	CBU_0794
	CBU_2056									CBU_1461	CBU_1150	CBU_0822
	CbuG_0789									CBU_1485	CBU_1213	CBU_0886
	COXBURSA331_A0436-like									CBU_1493	CBU_1268	CBU_1043
	COXBURSA331_A1449									CBU_1530	CBU_1292	CBU_1107
										CBU_1543	CBU_1314	CBU_1314
										CBU_1556	CBU_1349	CBU_1434
										CBU_1566	CBU_1370	CBU_1493
										CBU_1569	CBU_1379	CBU_1556
										CBU_1576	CBU_1387	CBU_1569
										CBU_1685	CBU_1434	CBU_1576
										CBU_1686	CBU_1457	CBU_1594
										CBU_1699	CBU_1485	CBU_1607
										CBU_1724	CBU_1543	CBU_1639
										CBU_1751	CBU_1556	CBU_1677
										CBU_1769	CBU_1576	CBU_1699
										CBU_1794	CBU_1639	CBU_1724
										CBU_1818	CBU_1665	CBU_1751
										CBU_1819	CBU_1685	CBU_1752
										CBU_1825	CBU_1699	CBU_1754-7
										CBU_2007	CBU_1724	CBU_1769
										CBU_2052	CBU_1751	CBU_1780
										CBU_2056	CBU_1752	CBU_1789
										CBUA0013	CBU_1789	CBU_1818
										CBUA0025	CBU_1794	CBU_1863
										CBUD_2063	CBU_1818	CBU_1957
										CbuK_0972	CBU_1819	CBU_2007
										CbuK_1976	CBU_1863	CBU_2028
										COXBURSA331_A0436-like	CBU_2016	CBU_2052
											CBU_2028	CBU_2059
											CBU_2056	CBU_2069
											CBU_2069	CBU_2076
											CBUA0006	CBUA0006
											CBUA0013	CBUA0013
											CBUA0025	CBUD_0454
											CBUD_0231	CBUD_0618-like
											CBUD_1462	CBUD_0997
											CbuG_0789	CBUD_1462
											CbuK_1976	CBUD_1704-like
											COXBURSA331_A0436-like	CBUD_1884
												CBUD_RS08635
												CBUD_RS11275
												COXBURSA331_A0522
												cpeI
												cpeJ
												cpeK
												cpeL
