# Supplementary material for: Genome characteristics and type IV effector protein repertoire of Coxiella burnetii depend rather on Genomic Groups than on host species
Source: BMC Microbiol. 2026 Apr 22;26:393. doi: 10.1186/s12866-026-04897-w (PMC13104383; doi:10.1186/s12866-026-04897-w)
Supplement: Supplementary file 12 — Additional file 12: Table S8. T4BSS protein sequence variants. Sequence variants of T4BSS proteins detected in the investigated C. burnetii strains. A number was assigned to each sequence variation. [file 12866_2026_4897_MOESM12_ESM.xlsx]

## Sheet: Tabelle1
Organism	DotA	DotB	DotC	DotD	DotE	DotN	DotO	DotP	IcmE	IcmG	IcmH	IcmK	IcmL1	IcmL2	IcmN	IcmO	IcmP	IcmQ	IcmR	IcmS	IcmT	IcmV	IcmW	IcmX
15QC1192	1	2	5	3	1	1	1	2	4	1	2	1	1	1	1	1	1	1	1	1	1	1	1	1
15QC1194	1	2	5	3	1	1	1	2	4	1	2	1	1	1	1	1	1	1	1	1	1	1	1	1
15QC1195	1	2	5	3	1	1	1	2	4	1	2	1	1	1	1	1	1	1	1	1	1	1	1	1
15QC1196	1	2	5	3	1	1	1	2	4	1	2	1	1	1	1	1	1	1	1	1	1	1	1	1
15QC1197	1	2	5	3	1	1	1	2	4	1	2	1	1	1	1	1	1	1	1	1	1	1	1	1
15QC1330	2	1	5	2	1	1	1	2	4	1	disrupted	1	1	1	1	1	2	1	1	1	1	truncated_at_c	1	1
15QC1343	1	2	5	3	1	1	1	2	4	1	2	1	1	1	1	1	1	1	1	1	1	1	1	1
15QC1346	1	2	5	3	1	1	1	2	4	1	2	1	1	1	1	1	1	1	1	1	1	1	1	1
15QC1348	1	2	5	3	1	1	1	2	4	1	2	1	1	1	1	1	1	1	1	1	1	1	1	1
15QC1349	1	2	5	3	1	1	1	2	4	1	2	1	1	1	1	1	1	1	1	1	1	1	1	1
18QC0072	1	2	5	3	1	1	1	2	4	1	2	1	1	1	1	1	1	1	1	1	1	1	1	1
18QC0075	2	1	5	2	1	1	1	2	4	1	disrupted	1	1	1	1	1	2	1	1	1	1	truncated_at_c	1	1
18QC1769	4	1	5	3	1	1	1	2	2	1	3	2	1	1	2	1	2	2	1	1	1	truncated_at_c	1	1
18QC1770	2	1	5	2	1	1	1	2	4	1	disrupted	1	1	1	1	1	2	1	1	1	1	truncated_at_c	1	1
18QC1771	1	2	5	3	1	1	1	2	4	1	2	1	1	1	1	1	1	1	1	1	1	1	1	1
18QC1773	1	2	5	3	1	1	1	2	4	1	2	1	1	1	1	1	1	1	1	1	1	1	1	1
18QC1774	1	2	5	3	1	1	1	2	4	1	2	1	1	1	1	1	1	1	1	1	1	1	1	1
18QC1775	1	2	5	3	1	1	1	2	4	1	2	1	1	1	1	1	1	1	1	1	1	1	1	1
19QC0291	2	1	5	2	1	1	1	2	4	1	disrupted	1	1	1	1	1	2	1	1	1	1	truncated_at_c	1	1
21QC0776	2	1	5	2	1	1	1	2	4	1	disrupted	1	1	1	1	1	2	1	1	1	1	truncated_at_c	1	1
21QC0869	2	1	5	2	1	1	1	2	4	1	disrupted	1	1	1	1	1	2	1	1	1	1	truncated_at_c	1	1
22QC0001	2	1	5	2	1	1	1	2	disrupted	1	disrupted	1	1	1	1	1	2	1	1	1	1	truncated_at_c	1	1
22QC1334	1	2	5	3	1	1	1	2	4	1	2	1	1	1	1	1	1	1	1	1	1	1	1	1
22QC1335	2	1	5	2	1	1	1	2	4	1	disrupted	1	1	1	1	1	2	1	1	1	1	truncated_at_c	1	1
22QC1336	2	1	5	2	1	1	1	2	4	1	disrupted	1	1	2	1	1	2	1	1	1	1	truncated_at_c	1	1
22QC1338	2	1	5	2	1	1	1	2	4	1	disrupted	1	1	1	1	1	2	1	1	1	1	truncated_at_c	1	1
22QC1339	1	2	5	3	1	1	1	2	4	1	2	1	1	1	1	1	1	1	1	1	1	1	1	1
22QC1340	2	1	5	2	1	1	1	2	4	1	disrupted	1	1	1	1	1	2	1	1	1	1	truncated_at_c	1	1
22QC1341	2	1	5	2	1	1	1	2	4	1	disrupted	1	1	1	1	1	2	1	1	1	1	truncated_at_c	1	1
22QC1342	2	1	5	2	1	1	1	2	4	1	disrupted	1	1	1	1	1	2	1	1	1	1	truncated_at_c	1	1
22QC1343	2	1	5	2	1	1	1	2	4	1	disrupted	1	1	1	1	1	2	1	1	1	1	truncated_at_c	1	1
23QC0408	2	3	5	1	1	1	1	2	1	1	3	1	1	1	1	1	2	1	1	3	1	truncated_at_c	3	1
23QC0414	1	2	5	3	1	1	1	2	4	1	2	1	1	1	1	1	1	1	1	1	1	1	1	1
23QC0415	1	2	5	3	1	1	1	2	4	1	2	1	1	1	1	1	1	1	1	1	1	1	1	1
23QC0422	4	1	5	3	1	1	1	2	2	1	3	2	1	1	2	1	2	2	1	1	1	truncated_at_c	1	1
23QC0438	2	1	5	2	1	1	1	2	4	1	disrupted	1	1	1	1	1	2	1	1	1	1	truncated_at_c	1	1
23QC0439	2	1	5	2	1	1	1	2	4	1	disrupted	1	1	1	1	1	2	1	1	1	1	truncated_at_c	1	1
23QC0441	1	2	5	3	1	1	1	2	4	1	2	1	1	1	1	1	1	1	1	1	1	1	1	1
DRR179087	4	1	5	3	1	1	1	2	2	1	3	2	1	1	2	1	2	2	1	1	1	truncated_at_c	1	1
DRR179091	4	1	5	3	1	1	1	2	2	1	3	2	1	1	2	1	2	2	1	1	1	truncated_at_c	1	1
ERR436391	2	1	5	2	1	1	1	2	4	1	disrupted	1	1	1	1	1	2	1	1	1	1	truncated_at_c	1	1
ERR436392	2	1	5	2	1	1	1	2	4	1	disrupted	1	1	1	1	1	2	1	1	1	1	truncated_at_c	1	1
ERR436395	2	1	5	2	1	1	1	2	4	1	disrupted	1	1	1	1	1	2	1	1	1	1	truncated_at_c	1	1
ERR436396	2	3	5	1	1	1	1	2	1	1	3	1	1	1	1	1	2	1	1	3	1	truncated_at_c	3	1
GCF000007765	4	1	5	3	1	1	1	2	2	1	3	2	1	1	2	1	2	1	1	1	1	truncated_at_c	1	1
GCF000017105	5	1	1	4	2	1	1	1	13	3	7	5	1	1	1	3	4	1	1	4	1	truncated_at_c	1	2
GCF000019865	7	1	4	3	1	3	3	2	9	3	4	1	1	1	1	2	2	3	1	5	1	truncated_at_c	2	2
GCF000019885	6	1	2	4	2	1	4	2	11	2	6	4	2	1	3	3	5	7	1	1	1	truncated_at_c	1	4
GCF000168875	6	1	2	4	2	1	4	2	11	2	6	4	2	1	3	3	5	7	1	1	1	truncated_at_c	1	4
GCF000169495	3	1	2	4	2	1	4	2	10	3	6	3	2	1	1	3	3	6	1	1	1	truncated_at_c	1	7
GCF000612785	4	1	5	3	1	1	1	2	2	1	3	2	1	1	2	1	2	2	1	1	1	truncated_at_c	1	1
GCF000751935	7	1	4	3	1	2	3	2	9	3	4	1	1	1	1	2	2	3	1	5	1	truncated_at_c	2	2
GCF000767035	8	1	3	4	2	1	5	2	15	3	6	1	2	1	1	3	3	6	1	1	1	truncated_at_c	1	6
GCF000820465	3	1	2	4	2	1	6	2	14	3	6	3	2	1	1	3	3	6	1	1	1	truncated_at_c	1	5
GCF001572745	2	3	5	1	1	1	1	2	1	1	3	1	1	1	1	1	2	1	1	3	1	truncated_at_c	3	1
GCF001572765	2	3	5	1	1	1	1	2	1	1	10	1	1	1	1	1	2	1	1	3	1	truncated_at_c	3	1
GCF002247185	2	1	5	2	1	1	1	2	6	1	disrupted	1	1	1	1	1	2	1	1	1	1	truncated_at_c	1	1
GCF002247205	4	1	5	3	1	1	1	2	2	1	3	2	1	1	2	1	2	2	1	1	1	truncated_at_c	1	1
GCF002247265	4	1	5	3	1	1	1	2	2	1	3	2	1	1	2	1	2	1	1	1	1	truncated_at_c	1	1
GCF002247285	4	1	5	3	1	1	1	2	2	1	3	2	1	1	2	1	2	1	1	1	1	truncated_at_c	1	1
GCF002247335	4	1	5	3	1	1	1	2	2	1	3	2	1	1	2	1	2	1	1	1	1	truncated_at_c	1	1
GCF002247545	5	1	1	4	2	1	1	1	13	3	7	5	1	1	1	3	4	1	1	4	1	truncated_at_c	1	2
GCF002249845	4	1	5	3	1	1	1	2	2	1	3	2	1	1	2	1	2	1	1	1	1	truncated_at_c	1	1
GCF002633885	7	1	4	3	1	2	3	2	9	3	4	1	1	1	1	2	2	3	1	5	1	truncated_at_c	2	2
GCF002633905	2	3	5	1	1	1	1	2	1	1	3	1	1	1	1	1	2	1	1	3	1	truncated_at_c	3	1
GCF002633925	2	3	5	1	1	1	1	2	1	1	10	1	1	3	1	1	2	1	1	3	1	truncated_at_c	3	1
GCF002633945	2	1	5	2	1	1	1	2	4	1	disrupted	1	1	1	1	1	2	1	1	1	1	truncated_at_c	1	1
GCF002633965	2	1	5	2	1	1	1	2	4	1	disrupted	1	1	1	1	1	2	1	1	1	1	truncated_at_c	1	1
GCF002633985	2	1	5	2	1	1	1	2	4	1	disrupted	1	1	1	1	1	2	1	1	1	1	truncated_at_c	1	1
GCF002634005	2	1	5	2	1	1	1	2	4	1	disrupted	1	1	1	1	1	2	1	1	1	1	truncated_at_c	1	1
GCF002634025	1	2	5	3	1	1	1	2	4	1	11	1	1	1	1	1	1	1	1	1	1	1	1	1
GCF002634045	1	2	5	3	1	1	1	2	4	1	11	1	1	1	1	1	1	1	1	1	1	1	1	1
GCF002634065	3	1	2	4	2	1	4	2	10	3	6	3	2	1	1	3	3	6	1	1	1	truncated_at_c	1	7
GCF002634085	2	3	5	1	1	1	1	2	1	1	3	1	1	1	1	1	2	1	1	3	1	truncated_at_c	3	1
GCF002896735	2	1	5	2	1	1	1	2	4	1	disrupted	1	1	1	1	1	2	4	1	1	1	truncated_at_c	1	1
GCF002896755	2	1	5	2	1	1	1	2	4	1	disrupted	1	1	1	1	1	2	1	1	1	1	truncated_at_c	1	1
GCF002896775	2	1	5	2	1	1	1	2	4	1	disrupted	1	1	1	1	1	2	1	1	1	1	truncated_at_c	1	1
GCF002896835	2	1	5	2	1	1	1	2	4	1	disrupted	1	1	1	1	1	2	1	1	1	1	truncated_at_c	1	1
GCF003849965	2	1	5	2	1	1	1	2	7	1	disrupted	1	1	1	1	1	2	1	1	1	1	truncated_at_c	1	1
GCF024918495	2	3	5	1	1	1	1	2	5	1	3	1	1	1	4	1	2	1	1	2	1	truncated_at_c	3	1
GCF024918535	2	3	5	1	1	1	1	2	5	1	3	1	1	1	5	1	2	1	1	3	1	truncated_at_c	3	1
GCF024918555	6	1	2	4	2	1	4	2	11	2	6	1	2	1	3	3	5	7	1	1	1	truncated_at_c	1	8
GCF024918575	3	1	2	4	2	1	4	2	11	2	5	1	2	1	3	3	5	7	1	1	1	truncated_at_c	1	4
GCF024918595	2	3	5	1	1	1	1	2	4	1	3	1	1	1	4	1	2	1	1	2	1	truncated_at_c	3	3
GCF024918615	2	3	5	1	1	1	1	2	4	1	3	1	1	4	5	1	2	5	1	2	1	truncated_at_c	3	1
GCF024918635	4	1	5	3	1	1	1	2	2	1	3	2	1	1	2	1	2	1	1	1	1	truncated_at_c	1	1
GCF024918655	3	1	2	4	2	1	4	2	12	3	6	3	2	1	1	3	3	6	1	1	1	truncated_at_c	1	2
GCF024918675	6	1	2	4	2	1	4	2	11	2	6	1	2	1	3	3	5	7	1	1	1	truncated_at_c	1	4
GCF024918695	1	2	5	3	1	1	1	2	4	1	2	1	1	1	1	1	1	1	1	1	1	1	1	1
GCF025989895	2	3	5	truncated_at_n	1	1	1	2	1	1	3	1	1	1	1	1	2	1	1	2	1	truncated_at_c	3	1
GCF025989925	6	1	2	4	2	1	4	2	11	2	6	1	2	1	3	3	5	7	1	1	1	truncated_at_c	1	4
GCF025989955	7	1	4	3	1	1	3	2	9	3	4	1	1	1	1	2	2	3	1	5	1	truncated_at_c	2	2
GCF025990005	2	3	5	1	1	1	1	2	1	1	3	1	1	1	1	1	2	1	1	3	1	truncated_at_c	3	1
GCF025990095	2	3	5	1	1	1	1	2	1	1	3	1	1	1	1	1	2	1	1	2	1	truncated_at_c	3	1
GCF025990275	4	1	5	3	1	1	1	2	2	1	3	2	1	1	2	1	2	1	1	1	1	truncated_at_c	1	1
GCF025990295	2	1	5	2	1	1	1	2	4	1	disrupted	1	1	1	1	1	2	1	1	1	1	truncated_at_c	1	1
GCF025990315	2	3	5	1	1	1	1	2	1	1	3	1	1	1	1	1	2	1	1	2	1	truncated_at_c	3	1
GCF025990355	2	3	5	1	1	1	1	2	1	1	3	1	1	1	1	1	2	1	1	3	1	truncated_at_c	3	1
GCF025990375	2	3	5	1	1	1	1	2	1	1	3	1	1	1	1	1	2	1	1	2	1	truncated_at_c	3	1
GCF025990395	2	1	5	2	1	1	1	2	4	1	disrupted	1	1	1	1	1	2	1	1	1	1	truncated_at_c	1	1
GCF025990455	4	1	5	3	1	1	1	2	2	1	3	2	1	1	2	1	2	1	1	1	1	truncated_at_c	1	1
GCF025990495	3	1	2	4	2	1	4	2	12	3	6	3	2	1	1	3	3	6	1	1	1	truncated_at_c	1	2
GCF025990535	3	1	2	4	2	1	4	2	10	3	6	3	2	1	1	3	3	6	1	1	1	truncated_at_c	1	5
GCF025990565	3	1	2	4	2	1	4	2	14	3	6	3	3	1	1	3	3	6	1	1	1	truncated_at_c	1	5
GCF025990595	6	1	2	4	2	1	4	2	11	2	6	1	2	1	3	3	5	7	1	1	1	truncated_at_c	1	4
GCF025990615	6	1	2	4	2	1	4	2	11	2	6	1	2	1	3	3	5	7	1	1	1	truncated_at_c	1	4
GCF025990695	6	1	2	4	2	1	4	2	11	2	6	4	2	1	3	3	5	7	1	1	1	truncated_at_c	1	4
GCF025990715	3	1	2	4	2	1	4	2	14	3	6	3	2	1	1	3	3	6	1	1	1	truncated_at_c	1	5
GCF025990755	4	1	5	3	1	1	1	2	2	1	3	2	1	1	2	1	2	1	1	1	1	truncated_at_c	1	1
GCF025990765	2	3	5	1	1	1	1	2	16	1	3	1	1	1	1	1	2	1	1	2	1	truncated_at_c	3	1
GCF025990795	6	1	2	4	2	1	4	2	11	2	6	1	2	1	3	3	5	7	1	1	1	truncated_at_c	1	4
GCF025990815	3	1	5	3	1	1	1	2	8	1	3	1	1	1	1	1	2	1	1	1	1	truncated_at_c	1	1
GCF025990835	6	1	2	4	2	1	4	2	11	2	6	1	2	1	3	3	5	7	1	1	1	truncated_at_c	1	4
GCF025990855	3	1	2	4	2	1	4	2	12	3	6	3	2	1	1	3	3	6	1	1	1	truncated_at_c	1	2
GCF025990865	3	1	2	4	2	1	4	2	10	3	6	3	2	1	1	3	3	6	1	1	1	truncated_at_c	1	5
GCF025990895	3	1	2	4	2	1	4	2	10	3	8	3	2	1	1	3	3	6	1	1	1	truncated_at_c	1	5
GCF027627535	4	1	5	3	1	1	1	2	2	1	3	2	1	1	2	1	2	1	1	1	1	truncated_at_c	1	1
GCF027943585	2	1	5	2	1	1	1	2	6	1	disrupted	1	1	1	1	1	2	1	1	1	1	truncated_at_c	1	1
GCF027943605	4	1	5	3	1	1	1	2	2	1	3	2	1	1	2	1	2	2	1	1	1	truncated_at_c	1	1
GCF032463305	3	4	2	4	2	1	4	2	12	3	6	3	2	1	1	3	3	6	1	1	1	truncated_at_c	1	2
SRR12935076	2	1	5	2	1	1	1	2	4	1	disrupted	1	1	1	1	1	2	1	1	1	1	truncated_at_c	1	1
SRR12935077	2	1	5	2	1	1	1	2	4	1	disrupted	1	1	1	1	1	2	1	1	1	1	truncated_at_c	1	1
SRR12935078	2	1	5	2	1	1	1	2	4	1	disrupted	1	1	1	1	1	2	1	1	1	1	truncated_at_c	1	1
SRR22439204	3	1	2	4	2	1	4	2	11	2	6	1	2	1	3	3	5	7	1	1	1	truncated_at_c	1	4
SRR22439205	3	1	2	4	2	1	4	2	11	2	6	1	2	1	3	3	5	7	1	1	1	truncated_at_c	1	4
SRR26633117	4	1	5	3	1	1	1	2	2	1	3	2	1	1	2	1	2	2	1	1	1	truncated_at_c	1	1
SRR3347474	2	1	5	2	1	1	1	2	6	1	disrupted	1	1	1	1	1	2	1	1	1	1	truncated_at_c	1	1
SRR405074	4	1	5	3	1	1	1	2	2	1	3	2	1	1	2	1	2	2	1	1	1	truncated_at_c	1	1
SRR405075	7	1	4	3	1	1	3	2	9	3	4	1	1	1	1	2	2	3	1	5	1	truncated_at_c	2	2
SRR6300869	4	1	5	3	1	1	1	2	2	1	3	2	1	1	2	1	2	2	1	1	1	truncated_at_c	1	1
SRR6300871	1	2	5	3	1	1	1	2	4	1	2	1	1	1	1	1	1	1	1	1	1	1	1	1
SRR6300872	4	1	5	3	1	1	1	2	2	1	3	2	1	1	2	1	2	2	1	1	1	truncated_at_c	1	1
SRR6300873	4	1	5	3	1	1	1	2	2	1	3	2	1	1	2	1	2	2	1	1	1	truncated_at_c	1	1
SRR6300874	4	1	5	3	1	1	1	2	2	1	3	2	1	1	2	1	2	1	1	1	1	truncated_at_c	1	1
SRR6300875	5	1	1	4	2	1	1	1	13	3	7	5	1	1	1	3	4	1	1	4	1	truncated_at_c	1	2
SRR6479428	3	5	5	5	3	1	2	2	2	1	3	1	1	1	1	1	2	1	1	1	1	truncated_at_c	1	1
SRR6479430	2	3	5	1	1	1	1	2	1	1	3	1	1	1	1	1	2	1	1	3	1	truncated_at_c	3	1
SRR8234304	2	3	5	1	1	1	1	2	1	1	3	1	1	1	1	1	2	1	1	2	1	truncated_at_c	3	1
SRR8234306	2	3	5	1	1	1	1	2	1	1	3	1	1	1	1	1	2	1	1	3	1	truncated_at_c	3	1
SRR8234307	2	3	5	1	1	1	1	2	1	1	3	1	1	1	1	1	2	1	1	3	1	truncated_at_c	3	1
